# Supplementary material for: The development and evaluation of a medication diary to report problems with medication use
Source: PubMed Central journal article supplement — Heliyon. 2024 Feb 9;10(4):e26127. doi: 10.1016/j.heliyon.2024.e26127 (PMC10875575; doi:10.1016/j.heliyon.2024.e26127), 2024-02-09



# My MEDICATION DIARY

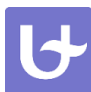

University of Antwerp  
Faculty of Medicine and  
Health Sciences

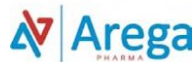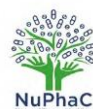

# Table of Contents

|                                       |    |
|---------------------------------------|----|
| Personal information                  | 3  |
| The relevance of a medication diary   | 4  |
| How to complete the medication chart? | 5  |
| Medication chart                      | 6  |
| Information for each medicine         | 15 |
| How to fill in my medication diary    | 25 |
| Monthly overview                      | 26 |
| Problem sheets                        | 51 |
| Notes                                 | 92 |

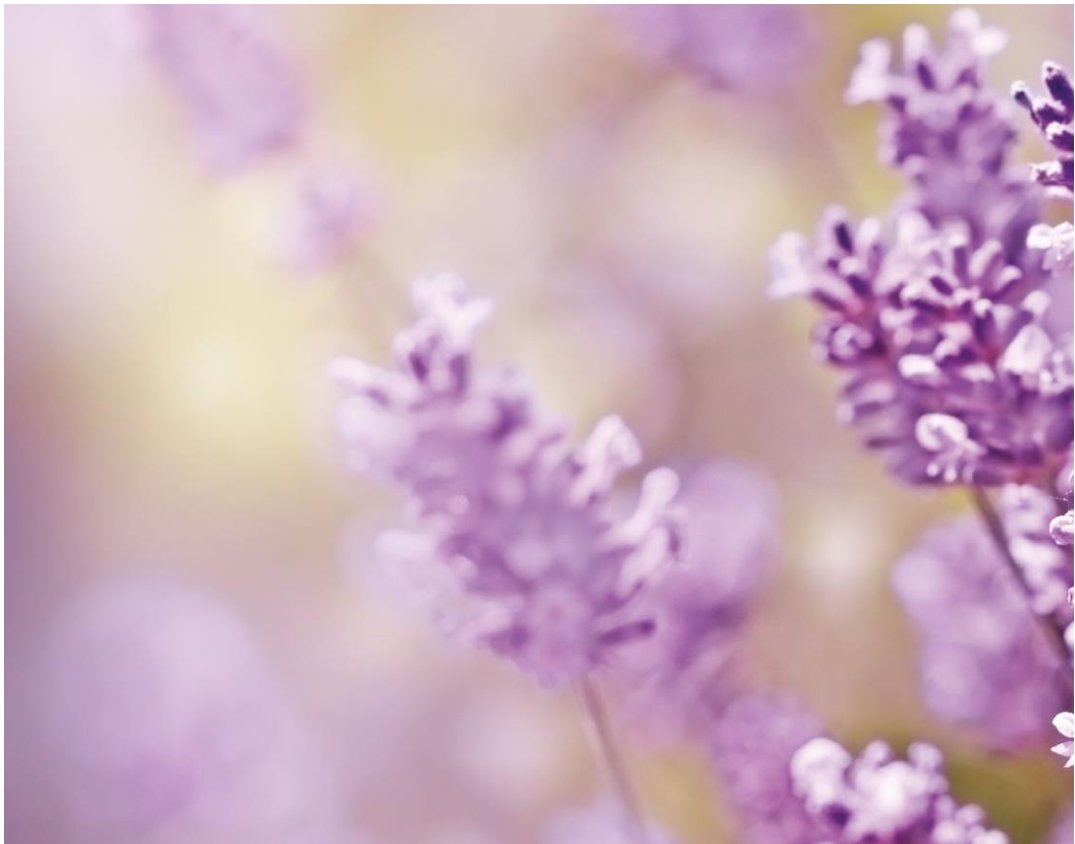

# Personal information

Name: \_\_\_\_\_

Phone number: \_\_\_\_\_

Email: \_\_\_\_\_

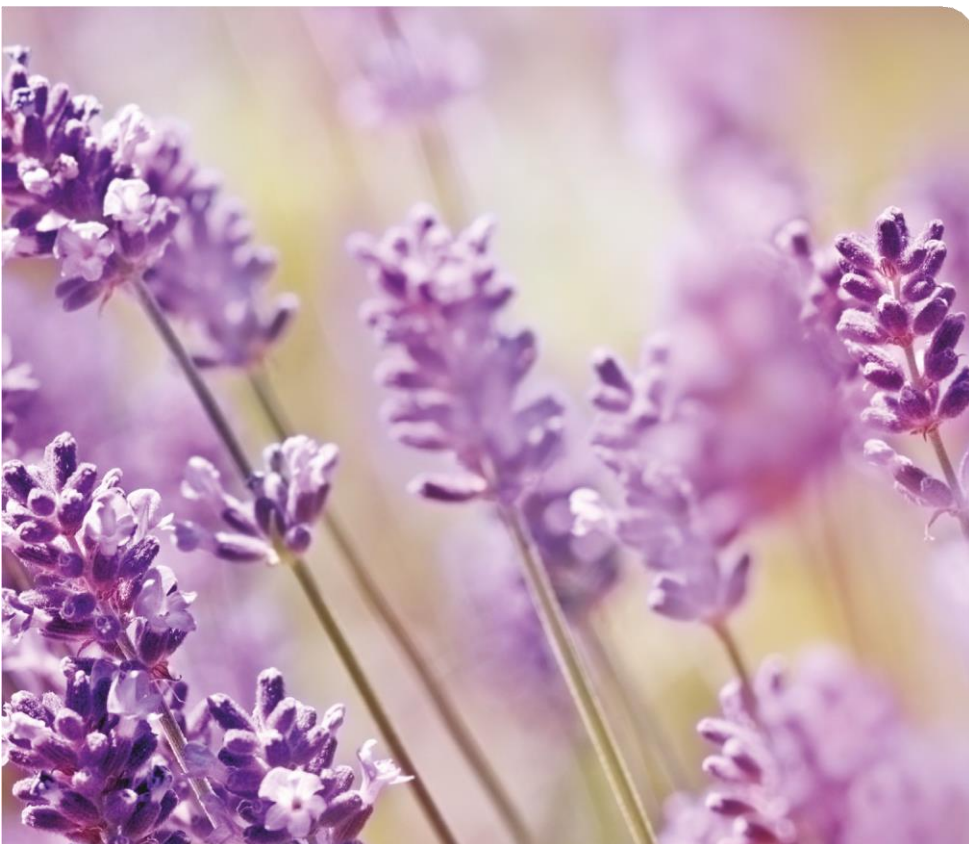

## The **relevance** of a medication diary

Good communication between patients and healthcare providers is crucial for treatment with medication to work well. On the one hand, it is important for the treatment to be tailored to the patient's needs, experiences and goals. On the other hand, it is important for healthcare providers to see how the patient uses and responds to the medication prescribed.

This diary allows you to record problems with your medication. This will make it easier to discuss problems with your doctor, pharmacist, nurse, or any other healthcare providers, so they can help you by tailoring your medication to your specific needs.

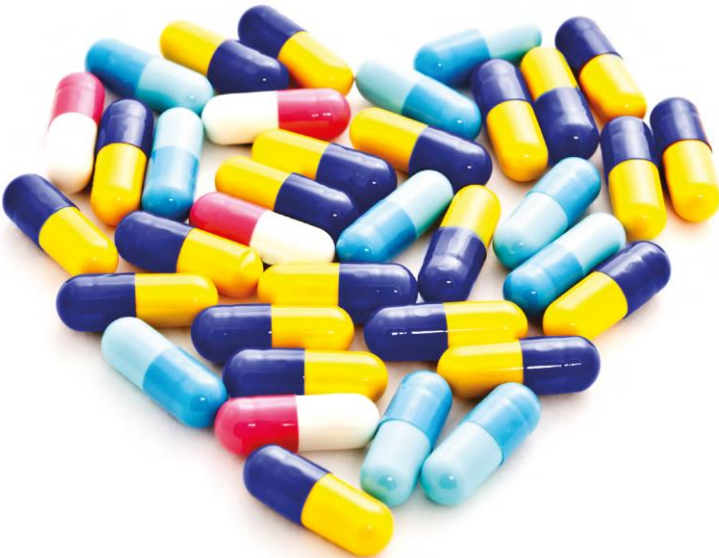

## How to complete the medication chart?

- By listing the different medications you take on the medication chart, you can keep a clear overview at all times.
- Note down every medicine you use: not only those prescribed by your doctor, but also any other products (food supplements, homeopathic remedies, etc.) that you take for your health.
- At the top, note the date you completed the schedule.
- For each medicine, state:
  - The name
  - The indication: the reason why you take the medication (e.g. diabetes, high blood pressure, etc.)
  - The dosing frequency: how often you are supposed to take the medication (e.g. every Monday, 3 times a day, etc.)
  - The amount (e.g. 1 tablet of 500mg).
  - The time of administration: the time of day when the medicine should be taken (e.g. at 8 a.m., before breakfast, etc.)
  - The administration route (e.g. oral, nasal, dermal, etc.).
  - The start date and stop date, if known.
- Leave fields blank if you do not know any of the above aspects.
- If you received a printed chart from your doctor, you can stick this into the diary on the page where you otherwise would have completed the chart.
- Whenever changes are made to your medication regimen, you should fill in a new medication chart.

# Medication Chart

| Brand name          | Indication  | Dosing frequency<br>+ quantity |
|---------------------|-------------|--------------------------------|
| Example: Omeprazole | Acid reflux | Once a day<br>1 tablet (10 mg) |
|                     |             |                                |
|                     |             |                                |
|                     |             |                                |
|                     |             |                                |
|                     |             |                                |
|                     |             |                                |
|                     |             |                                |
|                     |             |                                |
|                     |             |                                |
|                     |             |                                |
|                     |             |                                |
|                     |             |                                |
|                     |             |                                |

Date of completion: \_\_\_/\_\_\_/\_\_\_

Medication Chart

| Time                          | Administration | Start date      | Stop date       |
|-------------------------------|----------------|-----------------|-----------------|
| At 8 a.m.<br>before breakfast | Oral           | 1/6/2021        | 1/7/2021        |
|                               |                | ___ / ___ / ___ | ___ / ___ / ___ |
|                               |                | ___ / ___ / ___ | ___ / ___ / ___ |
|                               |                | ___ / ___ / ___ | ___ / ___ / ___ |
|                               |                | ___ / ___ / ___ | ___ / ___ / ___ |
|                               |                | ___ / ___ / ___ | ___ / ___ / ___ |
|                               |                | ___ / ___ / ___ | ___ / ___ / ___ |
|                               |                | ___ / ___ / ___ | ___ / ___ / ___ |
|                               |                | ___ / ___ / ___ | ___ / ___ / ___ |
|                               |                | ___ / ___ / ___ | ___ / ___ / ___ |
|                               |                | ___ / ___ / ___ | ___ / ___ / ___ |
|                               |                | ___ / ___ / ___ | ___ / ___ / ___ |
|                               |                | ___ / ___ / ___ | ___ / ___ / ___ |
|                               |                | ___ / ___ / ___ | ___ / ___ / ___ |
|                               |                | ___ / ___ / ___ | ___ / ___ / ___ |
|                               |                | ___ / ___ / ___ | ___ / ___ / ___ |



# Medication Chart

| Brand name          | Indication  | Dosing frequency + quantity    |
|---------------------|-------------|--------------------------------|
| Example: Omeprazole | Acid reflux | Once a day<br>1 tablet (10 mg) |
|                     |             |                                |
|                     |             |                                |
|                     |             |                                |
|                     |             |                                |
|                     |             |                                |
|                     |             |                                |
|                     |             |                                |
|                     |             |                                |
|                     |             |                                |
|                     |             |                                |
|                     |             |                                |

Date of completion: \_\_\_/\_\_\_/\_\_\_

Medication Chart

| Time                          | Administration | Start date  | Stop date   |
|-------------------------------|----------------|-------------|-------------|
| At 8 a.m.<br>before breakfast | Oral           | 1/6/2021    | 1/7/2021    |
|                               |                | ___/___/___ | ___/___/___ |
|                               |                | ___/___/___ | ___/___/___ |
|                               |                | ___/___/___ | ___/___/___ |
|                               |                | ___/___/___ | ___/___/___ |
|                               |                | ___/___/___ | ___/___/___ |
|                               |                | ___/___/___ | ___/___/___ |
|                               |                | ___/___/___ | ___/___/___ |
|                               |                | ___/___/___ | ___/___/___ |
|                               |                | ___/___/___ | ___/___/___ |
|                               |                | ___/___/___ | ___/___/___ |
|                               |                | ___/___/___ | ___/___/___ |
|                               |                | ___/___/___ | ___/___/___ |
|                               |                | ___/___/___ | ___/___/___ |
|                               |                | ___/___/___ | ___/___/___ |
|                               |                | ___/___/___ | ___/___/___ |

# Medication Chart

| Brand name          | Indication  | Dosing frequency + quantity    |
|---------------------|-------------|--------------------------------|
| Example: Omeprazole | Acid reflux | Once a day<br>1 tablet (10 mg) |
|                     |             |                                |
|                     |             |                                |
|                     |             |                                |
|                     |             |                                |
|                     |             |                                |
|                     |             |                                |
|                     |             |                                |
|                     |             |                                |
|                     |             |                                |
|                     |             |                                |
|                     |             |                                |
|                     |             |                                |
|                     |             |                                |
|                     |             |                                |
|                     |             |                                |
|                     |             |                                |
|                     |             |                                |
|                     |             |                                |
|                     |             |                                |
|                     |             |                                |

Date of completion: \_\_\_/\_\_\_/\_\_\_

Medication Chart

| Time                          | Administration | Start date  | Stop date   |
|-------------------------------|----------------|-------------|-------------|
| At 8 a.m.<br>before breakfast | Oral           | 1/6/2021    | 1/7/2021    |
|                               |                | ___/___/___ | ___/___/___ |
|                               |                | ___/___/___ | ___/___/___ |
|                               |                | ___/___/___ | ___/___/___ |
|                               |                | ___/___/___ | ___/___/___ |
|                               |                | ___/___/___ | ___/___/___ |
|                               |                | ___/___/___ | ___/___/___ |
|                               |                | ___/___/___ | ___/___/___ |
|                               |                | ___/___/___ | ___/___/___ |
|                               |                | ___/___/___ | ___/___/___ |
|                               |                | ___/___/___ | ___/___/___ |
|                               |                | ___/___/___ | ___/___/___ |
|                               |                | ___/___/___ | ___/___/___ |
|                               |                | ___/___/___ | ___/___/___ |
|                               |                | ___/___/___ | ___/___/___ |
|                               |                | ___/___/___ | ___/___/___ |

# Medication Chart

| Brand name          | Indication  | Dosing frequency + quantity    |
|---------------------|-------------|--------------------------------|
| Example: Omeprazole | Acid reflux | Once a day<br>1 tablet (10 mg) |
|                     |             |                                |
|                     |             |                                |
|                     |             |                                |
|                     |             |                                |
|                     |             |                                |
|                     |             |                                |
|                     |             |                                |
|                     |             |                                |
|                     |             |                                |
|                     |             |                                |
|                     |             |                                |
|                     |             |                                |
|                     |             |                                |
|                     |             |                                |
|                     |             |                                |
|                     |             |                                |
|                     |             |                                |
|                     |             |                                |

Date of completion: \_\_\_/\_\_\_/\_\_\_

Medication Chart

| Time                          | Administration | Start date  | Stop date   |
|-------------------------------|----------------|-------------|-------------|
| At 8 a.m.<br>before breakfast | Oral           | 1/6/2021    | 1/7/2021    |
|                               |                | ___/___/___ | ___/___/___ |
|                               |                | ___/___/___ | ___/___/___ |
|                               |                | ___/___/___ | ___/___/___ |
|                               |                | ___/___/___ | ___/___/___ |
|                               |                | ___/___/___ | ___/___/___ |
|                               |                | ___/___/___ | ___/___/___ |
|                               |                | ___/___/___ | ___/___/___ |
|                               |                | ___/___/___ | ___/___/___ |
|                               |                | ___/___/___ | ___/___/___ |
|                               |                | ___/___/___ | ___/___/___ |
|                               |                | ___/___/___ | ___/___/___ |

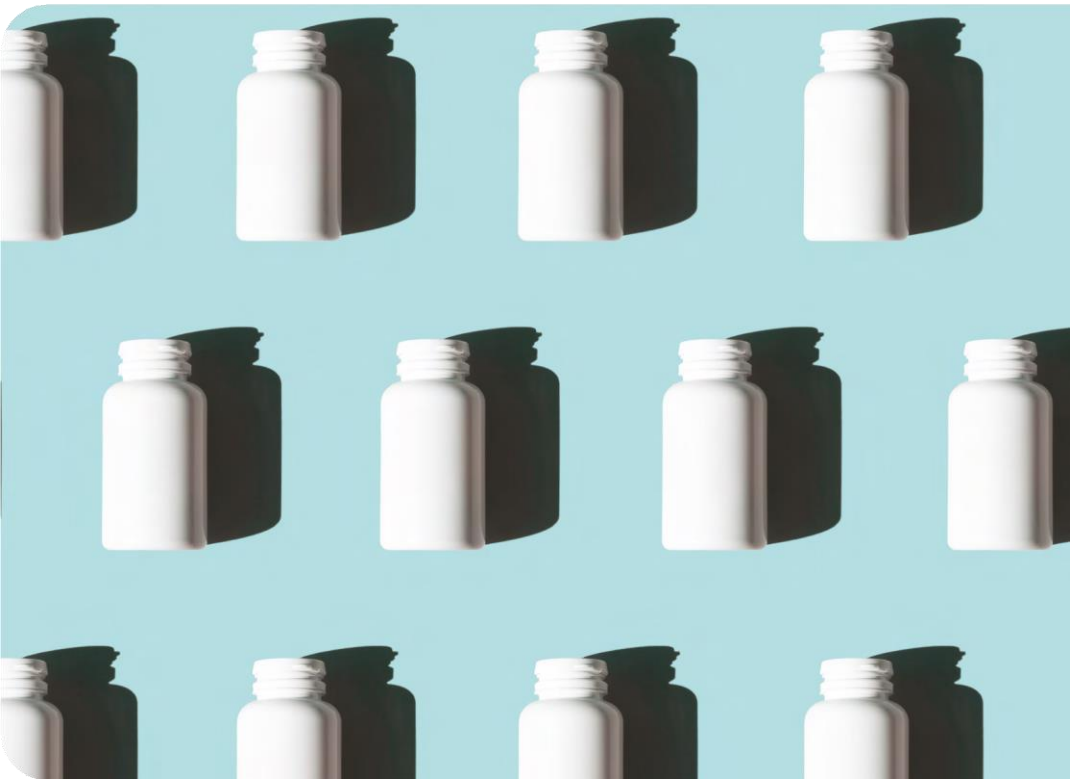

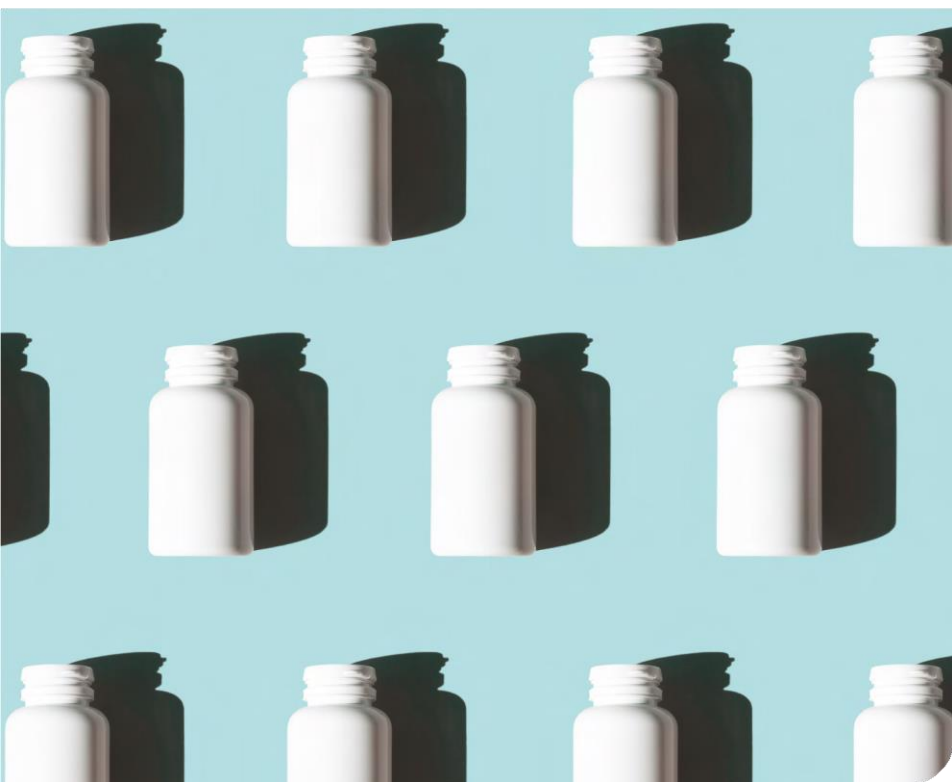

## Information for each medicine

You can opt to fill in an information sheet for each medicine you use, noting specifics such as common side effects or precautions to be taken.



# Medication name:

What should I pay attention to when taking the medication?

---

---

---

---

---

What adverse reactions can this medication cause?

---

---

---

---

---

What other information about the medication is relevant to me?

---

---

---

---

---

# Medication name:

What should I pay attention to when taking the medication?

---

---

---

---

---

---

What adverse reactions can this medication cause?

---

---

---

---

---

---

What other information about the medication is relevant to me?

---

---

---

---

---

---

# Medication name:

What should I pay attention to when taking the medication?

---

---

---

---

---

---

What adverse reactions can this medication cause?

---

---

---

---

---

---

---

---

What other information about the medication is relevant to me?

---

---

---

---

---

---

# Medication name:

What should I pay attention to when taking the medication?

---

---

---

---

---

---

What adverse reactions can this medication cause?

---

---

---

---

---

---

---

---

What other information about the medication is relevant to me?

---

---

---

---

---

---

# Medication name:

What should I pay attention to when taking the medication?

---

---

---

---

---

---

What adverse reactions can this medication cause?

---

---

---

---

---

---

What other information about the medication is relevant to me?

---

---

---

---

---

---

# Medication name:

What should I pay attention to when taking the medication?

---

---

---

---

---

---

What adverse reactions can this medication cause?

---

---

---

---

---

---

What other information about the medication is relevant to me?

---

---

---

---

---

---

# Medication name:

What should I pay attention to when taking the medication?

---

---

---

---

---

---

What adverse reactions can this medication cause?

---

---

---

---

---

---

---

---

What other information about the medication is relevant to me?

---

---

---

---

---

---

# Medication name:

What should I pay attention to when taking the medication?

---

---

---

---

---

---

What adverse reactions can this medication cause?

---

---

---

---

---

---

What other information about the medication is relevant to me?

---

---

---

---

---

---



# Diary

**Important:** There are no right or wrong answers. Try to fill in the diary as honestly as possible.

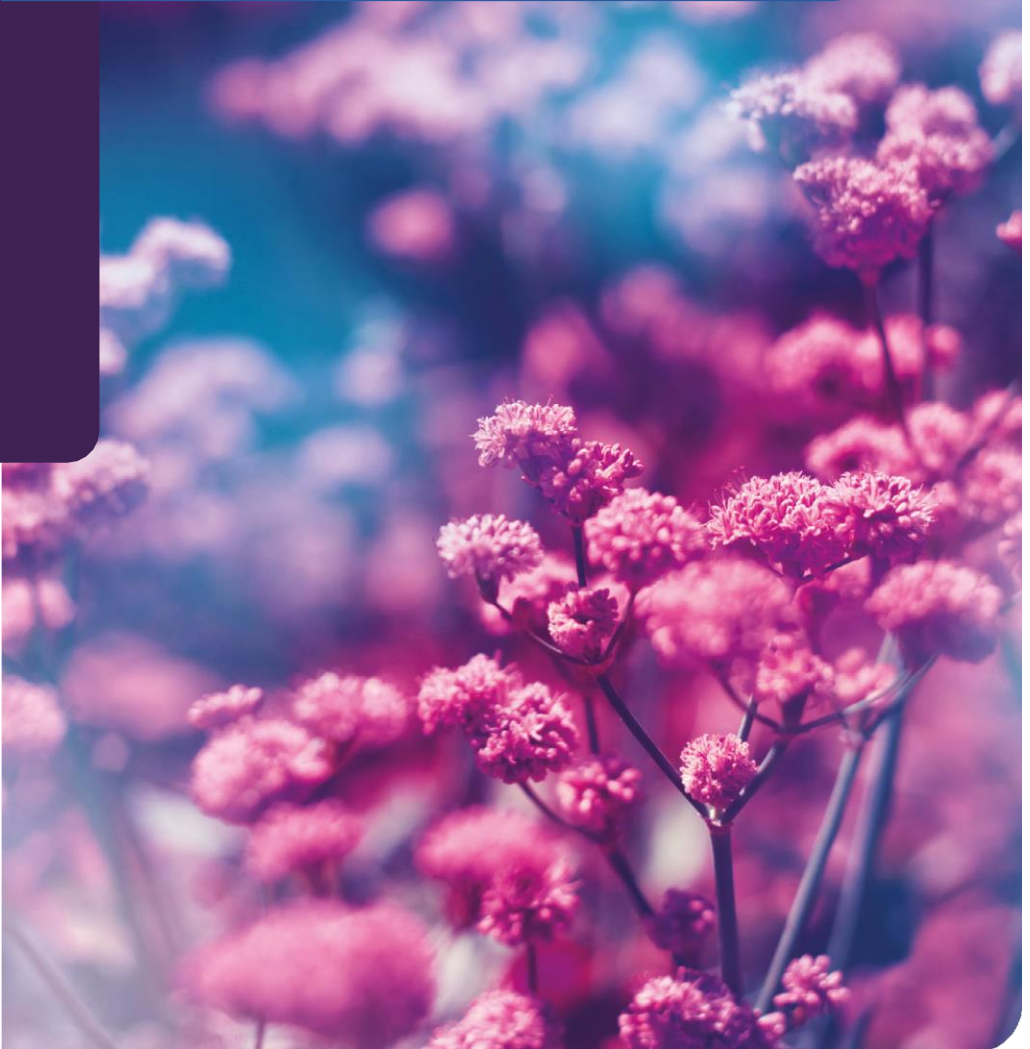

# How to fill in **my medication diary**?

The diary consists of a monthly overview, problem sheets, and notes.

## Monthly overview

- In the monthly overview, indicate for every day whether or not you experienced any problems with your medication.
- If you were unable to manage your own medication for a certain period, e.g. if you were hospitalised, you can mention this at the bottom of the monthly overview.

## Problem sheets

- You should only fill in a problem sheet if you experienced a problem with your medication on a particular day or during a particular period. If you did not experience any problems, do not fill in a problem sheet.
- At the top, always note the date of the day you experienced the problems (e.g. 01/01/2021) or, if the problems persist, you can also mention a period (e.g. from 01/01/2021 to 14/01/2021).
- Indicate which problems you experienced and which medication they relate to.
- Note whether or not you took action (e.g. contacting your doctor, home care nurse, pharmacist, etc.).

## Notes

Do you have specific questions for your doctor or another healthcare provider? If any new arrangements were made regarding your medication, you can mention these in the notes section at the back of the diary.

# Monthly overview January

01

Monthly overview January

| Year: _____ | I encountered<br><b>PROBLEMS</b> | I did <b>NOT</b><br>encounter any<br>problems |
|-------------|----------------------------------|-----------------------------------------------|
| 1 Jan.      | <input type="checkbox"/>         | <input type="checkbox"/>                      |
| 2 Jan.      | <input type="checkbox"/>         | <input type="checkbox"/>                      |
| 3 Jan.      | <input type="checkbox"/>         | <input type="checkbox"/>                      |
| 4 Jan.      | <input type="checkbox"/>         | <input type="checkbox"/>                      |
| 5 Jan.      | <input type="checkbox"/>         | <input type="checkbox"/>                      |
| 6 Jan.      | <input type="checkbox"/>         | <input type="checkbox"/>                      |
| 7 Jan.      | <input type="checkbox"/>         | <input type="checkbox"/>                      |
| 8 Jan.      | <input type="checkbox"/>         | <input type="checkbox"/>                      |
| 9 Jan.      | <input type="checkbox"/>         | <input type="checkbox"/>                      |
| 10 Jan.     | <input type="checkbox"/>         | <input type="checkbox"/>                      |
| 11 Jan.     | <input type="checkbox"/>         | <input type="checkbox"/>                      |
| 12 Jan.     | <input type="checkbox"/>         | <input type="checkbox"/>                      |
| 13 Jan.     | <input type="checkbox"/>         | <input type="checkbox"/>                      |
| 14 Jan.     | <input type="checkbox"/>         | <input type="checkbox"/>                      |
| 15 Jan.     | <input type="checkbox"/>         | <input type="checkbox"/>                      |
| 16 Jan.     | <input type="checkbox"/>         | <input type="checkbox"/>                      |
| 17 Jan.     | <input type="checkbox"/>         | <input type="checkbox"/>                      |
| 18 Jan.     | <input type="checkbox"/>         | <input type="checkbox"/>                      |
| 19 Jan.     | <input type="checkbox"/>         | <input type="checkbox"/>                      |
| 20 Jan.     | <input type="checkbox"/>         | <input type="checkbox"/>                      |
| 21 Jan.     | <input type="checkbox"/>         | <input type="checkbox"/>                      |
| 22 Jan.     | <input type="checkbox"/>         | <input type="checkbox"/>                      |
| 23 Jan.     | <input type="checkbox"/>         | <input type="checkbox"/>                      |
| 24 Jan.     | <input type="checkbox"/>         | <input type="checkbox"/>                      |
| 25 Jan.     | <input type="checkbox"/>         | <input type="checkbox"/>                      |
| 26 Jan.     | <input type="checkbox"/>         | <input type="checkbox"/>                      |
| 27 Jan.     | <input type="checkbox"/>         | <input type="checkbox"/>                      |
| 28 Jan.     | <input type="checkbox"/>         | <input type="checkbox"/>                      |
| 29 Jan.     | <input type="checkbox"/>         | <input type="checkbox"/>                      |
| 30 Jan.     | <input type="checkbox"/>         | <input type="checkbox"/>                      |
| 31 Jan.     | <input type="checkbox"/>         | <input type="checkbox"/>                      |

I did not manage my own medication from \_\_\_\_\_ / \_\_\_\_\_ / \_\_\_\_\_ to \_\_\_\_\_ / \_\_\_\_\_ / \_\_\_\_\_

Reason: \_\_\_\_\_  
\_\_\_\_\_

# Monthly overview February

02

Monthly overview February

| Year: _____ | I encountered<br><b>PROBLEMS</b> | I did <b>NOT</b><br>encounter any<br>problems |
|-------------|----------------------------------|-----------------------------------------------|
| 1 Feb.      | <input type="checkbox"/>         | <input type="checkbox"/>                      |
| 2 Feb.      | <input type="checkbox"/>         | <input type="checkbox"/>                      |
| 3 Feb.      | <input type="checkbox"/>         | <input type="checkbox"/>                      |
| 4 Feb.      | <input type="checkbox"/>         | <input type="checkbox"/>                      |
| 5 Feb.      | <input type="checkbox"/>         | <input type="checkbox"/>                      |
| 6 Feb.      | <input type="checkbox"/>         | <input type="checkbox"/>                      |
| 7 Feb.      | <input type="checkbox"/>         | <input type="checkbox"/>                      |
| 8 Feb.      | <input type="checkbox"/>         | <input type="checkbox"/>                      |
| 9 Feb.      | <input type="checkbox"/>         | <input type="checkbox"/>                      |
| 10 Feb.     | <input type="checkbox"/>         | <input type="checkbox"/>                      |
| 11 Feb.     | <input type="checkbox"/>         | <input type="checkbox"/>                      |
| 12 Feb.     | <input type="checkbox"/>         | <input type="checkbox"/>                      |
| 13 Feb.     | <input type="checkbox"/>         | <input type="checkbox"/>                      |
| 14 Feb.     | <input type="checkbox"/>         | <input type="checkbox"/>                      |
| 15 Feb.     | <input type="checkbox"/>         | <input type="checkbox"/>                      |
| 16 Feb.     | <input type="checkbox"/>         | <input type="checkbox"/>                      |
| 17 Feb.     | <input type="checkbox"/>         | <input type="checkbox"/>                      |
| 18 Feb.     | <input type="checkbox"/>         | <input type="checkbox"/>                      |
| 19 Feb.     | <input type="checkbox"/>         | <input type="checkbox"/>                      |
| 20 Feb.     | <input type="checkbox"/>         | <input type="checkbox"/>                      |
| 21 Feb.     | <input type="checkbox"/>         | <input type="checkbox"/>                      |
| 22 Feb.     | <input type="checkbox"/>         | <input type="checkbox"/>                      |
| 23 Feb.     | <input type="checkbox"/>         | <input type="checkbox"/>                      |
| 24 Feb.     | <input type="checkbox"/>         | <input type="checkbox"/>                      |
| 25 Feb.     | <input type="checkbox"/>         | <input type="checkbox"/>                      |
| 26 Feb.     | <input type="checkbox"/>         | <input type="checkbox"/>                      |
| 27 Feb.     | <input type="checkbox"/>         | <input type="checkbox"/>                      |
| 28 Feb.     | <input type="checkbox"/>         | <input type="checkbox"/>                      |
| [29 Feb.]   | <input type="checkbox"/>         | <input type="checkbox"/>                      |

I did not manage my own medication from \_\_\_\_\_ / \_\_\_\_\_ / \_\_\_\_\_ to \_\_\_\_\_ / \_\_\_\_\_ / \_\_\_\_\_

Reason: \_\_\_\_\_

# Monthly overview March

03

Monthly overview March

| Year: _____ | I encountered<br><b>PROBLEMS</b> | I did <b>NOT</b><br>encounter any<br>problems |
|-------------|----------------------------------|-----------------------------------------------|
| 1 Mar.      | <input type="checkbox"/>         | <input type="checkbox"/>                      |
| 2 Mar.      | <input type="checkbox"/>         | <input type="checkbox"/>                      |
| 3 Mar.      | <input type="checkbox"/>         | <input type="checkbox"/>                      |
| 4 Mar.      | <input type="checkbox"/>         | <input type="checkbox"/>                      |
| 5 Mar.      | <input type="checkbox"/>         | <input type="checkbox"/>                      |
| 6 Mar.      | <input type="checkbox"/>         | <input type="checkbox"/>                      |
| 7 Mar.      | <input type="checkbox"/>         | <input type="checkbox"/>                      |
| 8 Mar.      | <input type="checkbox"/>         | <input type="checkbox"/>                      |
| 9 Mar.      | <input type="checkbox"/>         | <input type="checkbox"/>                      |
| 10 Mar.     | <input type="checkbox"/>         | <input type="checkbox"/>                      |
| 11 Mar.     | <input type="checkbox"/>         | <input type="checkbox"/>                      |
| 12 Mar.     | <input type="checkbox"/>         | <input type="checkbox"/>                      |
| 13 Mar.     | <input type="checkbox"/>         | <input type="checkbox"/>                      |
| 14 Mar.     | <input type="checkbox"/>         | <input type="checkbox"/>                      |
| 15 Mar.     | <input type="checkbox"/>         | <input type="checkbox"/>                      |
| 16 Mar.     | <input type="checkbox"/>         | <input type="checkbox"/>                      |
| 17 Mar.     | <input type="checkbox"/>         | <input type="checkbox"/>                      |
| 18 Mar.     | <input type="checkbox"/>         | <input type="checkbox"/>                      |
| 19 Mar.     | <input type="checkbox"/>         | <input type="checkbox"/>                      |
| 20 Mar.     | <input type="checkbox"/>         | <input type="checkbox"/>                      |
| 21 Mar.     | <input type="checkbox"/>         | <input type="checkbox"/>                      |
| 22 Mar.     | <input type="checkbox"/>         | <input type="checkbox"/>                      |
| 23 Mar.     | <input type="checkbox"/>         | <input type="checkbox"/>                      |
| 24 Mar.     | <input type="checkbox"/>         | <input type="checkbox"/>                      |
| 25 Mar.     | <input type="checkbox"/>         | <input type="checkbox"/>                      |
| 26 Mar.     | <input type="checkbox"/>         | <input type="checkbox"/>                      |
| 27 Mar.     | <input type="checkbox"/>         | <input type="checkbox"/>                      |
| 28 Mar.     | <input type="checkbox"/>         | <input type="checkbox"/>                      |
| 29 Mar.     | <input type="checkbox"/>         | <input type="checkbox"/>                      |
| 30 Mar.     | <input type="checkbox"/>         | <input type="checkbox"/>                      |
| 31 Mar.     | <input type="checkbox"/>         | <input type="checkbox"/>                      |

I did not manage my own medication from \_\_\_\_\_ / \_\_\_\_\_ / \_\_\_\_\_ to \_\_\_\_\_ / \_\_\_\_\_ / \_\_\_\_\_

Reason: \_\_\_\_\_  
\_\_\_\_\_

# Monthly overview April

04

Monthly overview April

| Year: _____ | I encountered<br><b>PROBLEMS</b> | I did <b>NOT</b><br>encounter any<br>problems |
|-------------|----------------------------------|-----------------------------------------------|
| 1 Apr.      | <input type="checkbox"/>         | <input type="checkbox"/>                      |
| 2 Apr.      | <input type="checkbox"/>         | <input type="checkbox"/>                      |
| 3 Apr.      | <input type="checkbox"/>         | <input type="checkbox"/>                      |
| 4 Apr.      | <input type="checkbox"/>         | <input type="checkbox"/>                      |
| 5 Apr.      | <input type="checkbox"/>         | <input type="checkbox"/>                      |
| 6 Apr.      | <input type="checkbox"/>         | <input type="checkbox"/>                      |
| 7 Apr.      | <input type="checkbox"/>         | <input type="checkbox"/>                      |
| 8 Apr.      | <input type="checkbox"/>         | <input type="checkbox"/>                      |
| 9 Apr.      | <input type="checkbox"/>         | <input type="checkbox"/>                      |
| 10 Apr.     | <input type="checkbox"/>         | <input type="checkbox"/>                      |
| 11 Apr.     | <input type="checkbox"/>         | <input type="checkbox"/>                      |
| 12 Apr.     | <input type="checkbox"/>         | <input type="checkbox"/>                      |
| 13 Apr.     | <input type="checkbox"/>         | <input type="checkbox"/>                      |
| 14 Apr.     | <input type="checkbox"/>         | <input type="checkbox"/>                      |
| 15 Apr.     | <input type="checkbox"/>         | <input type="checkbox"/>                      |
| 16 Apr.     | <input type="checkbox"/>         | <input type="checkbox"/>                      |
| 17 Apr.     | <input type="checkbox"/>         | <input type="checkbox"/>                      |
| 18 Apr.     | <input type="checkbox"/>         | <input type="checkbox"/>                      |
| 19 Apr.     | <input type="checkbox"/>         | <input type="checkbox"/>                      |
| 20 Apr.     | <input type="checkbox"/>         | <input type="checkbox"/>                      |
| 21 Apr.     | <input type="checkbox"/>         | <input type="checkbox"/>                      |
| 22 Apr.     | <input type="checkbox"/>         | <input type="checkbox"/>                      |
| 23 Apr.     | <input type="checkbox"/>         | <input type="checkbox"/>                      |
| 24 Apr.     | <input type="checkbox"/>         | <input type="checkbox"/>                      |
| 25 Apr.     | <input type="checkbox"/>         | <input type="checkbox"/>                      |
| 26 Apr.     | <input type="checkbox"/>         | <input type="checkbox"/>                      |
| 27 Apr.     | <input type="checkbox"/>         | <input type="checkbox"/>                      |
| 28 Apr.     | <input type="checkbox"/>         | <input type="checkbox"/>                      |
| 29 Apr.     | <input type="checkbox"/>         | <input type="checkbox"/>                      |
| 30 Apr.     | <input type="checkbox"/>         | <input type="checkbox"/>                      |

I did not manage my own medication from \_\_\_\_\_ / \_\_\_\_ / \_\_\_\_ to \_\_\_\_\_ / \_\_\_\_ / \_\_\_\_

Reason: \_\_\_\_\_  
\_\_\_\_\_

# Monthly overview May

| Year: _____ | I encountered<br><b>PROBLEMS</b> | I did <b>NOT</b><br>encounter any<br>problems |
|-------------|----------------------------------|-----------------------------------------------|
| 1 May       | <input type="checkbox"/>         | <input type="checkbox"/>                      |
| 2 May       | <input type="checkbox"/>         | <input type="checkbox"/>                      |
| 3 May       | <input type="checkbox"/>         | <input type="checkbox"/>                      |
| 4 May       | <input type="checkbox"/>         | <input type="checkbox"/>                      |
| 5 May       | <input type="checkbox"/>         | <input type="checkbox"/>                      |
| 6 May       | <input type="checkbox"/>         | <input type="checkbox"/>                      |
| 7 May       | <input type="checkbox"/>         | <input type="checkbox"/>                      |
| 8 May       | <input type="checkbox"/>         | <input type="checkbox"/>                      |
| 9 May       | <input type="checkbox"/>         | <input type="checkbox"/>                      |
| 10 May      | <input type="checkbox"/>         | <input type="checkbox"/>                      |
| 11 May      | <input type="checkbox"/>         | <input type="checkbox"/>                      |
| 12 May      | <input type="checkbox"/>         | <input type="checkbox"/>                      |
| 13 May      | <input type="checkbox"/>         | <input type="checkbox"/>                      |
| 14 May      | <input type="checkbox"/>         | <input type="checkbox"/>                      |
| 15 May      | <input type="checkbox"/>         | <input type="checkbox"/>                      |
| 16 May      | <input type="checkbox"/>         | <input type="checkbox"/>                      |
| 17 May      | <input type="checkbox"/>         | <input type="checkbox"/>                      |
| 18 May      | <input type="checkbox"/>         | <input type="checkbox"/>                      |
| 19 May      | <input type="checkbox"/>         | <input type="checkbox"/>                      |
| 20 May      | <input type="checkbox"/>         | <input type="checkbox"/>                      |
| 21 May      | <input type="checkbox"/>         | <input type="checkbox"/>                      |
| 22 May      | <input type="checkbox"/>         | <input type="checkbox"/>                      |
| 23 May      | <input type="checkbox"/>         | <input type="checkbox"/>                      |
| 24 May      | <input type="checkbox"/>         | <input type="checkbox"/>                      |
| 25 May      | <input type="checkbox"/>         | <input type="checkbox"/>                      |
| 26 May      | <input type="checkbox"/>         | <input type="checkbox"/>                      |
| 27 May      | <input type="checkbox"/>         | <input type="checkbox"/>                      |
| 28 May      | <input type="checkbox"/>         | <input type="checkbox"/>                      |
| 29 May      | <input type="checkbox"/>         | <input type="checkbox"/>                      |
| 30 May      | <input type="checkbox"/>         | <input type="checkbox"/>                      |
| 31 May      | <input type="checkbox"/>         | <input type="checkbox"/>                      |

I did not manage my own medication from \_\_\_\_\_ / \_\_\_\_\_ / \_\_\_\_\_ to \_\_\_\_\_ / \_\_\_\_\_ / \_\_\_\_\_

Reason: \_\_\_\_\_  
\_\_\_\_\_

# Monthly overview June

06

Monthly overview June

| Year: _____ | I encountered<br><b>PROBLEMS</b> | I did <b>NOT</b><br>encounter any<br>problems |
|-------------|----------------------------------|-----------------------------------------------|
| 1 Jun.      | <input type="checkbox"/>         | <input type="checkbox"/>                      |
| 2 Jun.      | <input type="checkbox"/>         | <input type="checkbox"/>                      |
| 3 Jun.      | <input type="checkbox"/>         | <input type="checkbox"/>                      |
| 4 Jun.      | <input type="checkbox"/>         | <input type="checkbox"/>                      |
| 5 Jun.      | <input type="checkbox"/>         | <input type="checkbox"/>                      |
| 6 Jun.      | <input type="checkbox"/>         | <input type="checkbox"/>                      |
| 7 Jun.      | <input type="checkbox"/>         | <input type="checkbox"/>                      |
| 8 Jun.      | <input type="checkbox"/>         | <input type="checkbox"/>                      |
| 9 Jun.      | <input type="checkbox"/>         | <input type="checkbox"/>                      |
| 10 Jun.     | <input type="checkbox"/>         | <input type="checkbox"/>                      |
| 11 Jun.     | <input type="checkbox"/>         | <input type="checkbox"/>                      |
| 12 Jun.     | <input type="checkbox"/>         | <input type="checkbox"/>                      |
| 13 Jun.     | <input type="checkbox"/>         | <input type="checkbox"/>                      |
| 14 Jun.     | <input type="checkbox"/>         | <input type="checkbox"/>                      |
| 15 Jun.     | <input type="checkbox"/>         | <input type="checkbox"/>                      |
| 16 Jun.     | <input type="checkbox"/>         | <input type="checkbox"/>                      |
| 17 Jun.     | <input type="checkbox"/>         | <input type="checkbox"/>                      |
| 18 Jun.     | <input type="checkbox"/>         | <input type="checkbox"/>                      |
| 19 Jun.     | <input type="checkbox"/>         | <input type="checkbox"/>                      |
| 20 Jun.     | <input type="checkbox"/>         | <input type="checkbox"/>                      |
| 21 Jun.     | <input type="checkbox"/>         | <input type="checkbox"/>                      |
| 22 Jun.     | <input type="checkbox"/>         | <input type="checkbox"/>                      |
| 23 Jun.     | <input type="checkbox"/>         | <input type="checkbox"/>                      |
| 24 Jun.     | <input type="checkbox"/>         | <input type="checkbox"/>                      |
| 25 Jun.     | <input type="checkbox"/>         | <input type="checkbox"/>                      |
| 26 Jun.     | <input type="checkbox"/>         | <input type="checkbox"/>                      |
| 27 Jun.     | <input type="checkbox"/>         | <input type="checkbox"/>                      |
| 28 Jun.     | <input type="checkbox"/>         | <input type="checkbox"/>                      |
| 29 Jun.     | <input type="checkbox"/>         | <input type="checkbox"/>                      |
| 30 Jun.     | <input type="checkbox"/>         | <input type="checkbox"/>                      |

I did not manage my own medication from \_\_\_\_\_ / \_\_\_\_ / \_\_\_\_ to \_\_\_\_\_ / \_\_\_\_ / \_\_\_\_

Reason: \_\_\_\_\_  
\_\_\_\_\_



# Monthly overview July

| Year: _____ | I encountered<br><b>PROBLEMS</b> | I did <b>NOT</b><br>encounter any<br>problems |
|-------------|----------------------------------|-----------------------------------------------|
| 1 Jul.      | <input type="checkbox"/>         | <input type="checkbox"/>                      |
| 2 Jul.      | <input type="checkbox"/>         | <input type="checkbox"/>                      |
| 3 Jul.      | <input type="checkbox"/>         | <input type="checkbox"/>                      |
| 4 Jul.      | <input type="checkbox"/>         | <input type="checkbox"/>                      |
| 5 Jul.      | <input type="checkbox"/>         | <input type="checkbox"/>                      |
| 6 Jul.      | <input type="checkbox"/>         | <input type="checkbox"/>                      |
| 7 Jul.      | <input type="checkbox"/>         | <input type="checkbox"/>                      |
| 8 Jul.      | <input type="checkbox"/>         | <input type="checkbox"/>                      |
| 9 Jul.      | <input type="checkbox"/>         | <input type="checkbox"/>                      |
| 10 Jul.     | <input type="checkbox"/>         | <input type="checkbox"/>                      |
| 11 Jul.     | <input type="checkbox"/>         | <input type="checkbox"/>                      |
| 12 Jul.     | <input type="checkbox"/>         | <input type="checkbox"/>                      |
| 13 Jul.     | <input type="checkbox"/>         | <input type="checkbox"/>                      |
| 14 Jul.     | <input type="checkbox"/>         | <input type="checkbox"/>                      |
| 15 Jul.     | <input type="checkbox"/>         | <input type="checkbox"/>                      |
| 16 Jul.     | <input type="checkbox"/>         | <input type="checkbox"/>                      |
| 17 Jul.     | <input type="checkbox"/>         | <input type="checkbox"/>                      |
| 18 Jul.     | <input type="checkbox"/>         | <input type="checkbox"/>                      |
| 19 Jul.     | <input type="checkbox"/>         | <input type="checkbox"/>                      |
| 20 Jul.     | <input type="checkbox"/>         | <input type="checkbox"/>                      |
| 21 Jul.     | <input type="checkbox"/>         | <input type="checkbox"/>                      |
| 22 Jul.     | <input type="checkbox"/>         | <input type="checkbox"/>                      |
| 23 Jul.     | <input type="checkbox"/>         | <input type="checkbox"/>                      |
| 24 Jul.     | <input type="checkbox"/>         | <input type="checkbox"/>                      |
| 25 Jul.     | <input type="checkbox"/>         | <input type="checkbox"/>                      |
| 26 Jul.     | <input type="checkbox"/>         | <input type="checkbox"/>                      |
| 27 Jul.     | <input type="checkbox"/>         | <input type="checkbox"/>                      |
| 28 Jul.     | <input type="checkbox"/>         | <input type="checkbox"/>                      |
| 29 Jul.     | <input type="checkbox"/>         | <input type="checkbox"/>                      |
| 30 Jul.     | <input type="checkbox"/>         | <input type="checkbox"/>                      |
| 31 Jul.     | <input type="checkbox"/>         | <input type="checkbox"/>                      |

I did not manage my own medication from \_\_\_\_ / \_\_\_\_ / \_\_\_\_ to \_\_\_\_ / \_\_\_\_ / \_\_\_\_

Reason: \_\_\_\_\_  
 \_\_\_\_\_

# Monthly overview August

08

Monthly overview August

| Year: _____ | I encountered<br><b>PROBLEMS</b> | I did <b>NOT</b><br>encounter any<br>problems |
|-------------|----------------------------------|-----------------------------------------------|
| 1 Aug.      | <input type="checkbox"/>         | <input type="checkbox"/>                      |
| 2 Aug.      | <input type="checkbox"/>         | <input type="checkbox"/>                      |
| 3 Aug.      | <input type="checkbox"/>         | <input type="checkbox"/>                      |
| 4 Aug.      | <input type="checkbox"/>         | <input type="checkbox"/>                      |
| 5 Aug.      | <input type="checkbox"/>         | <input type="checkbox"/>                      |
| 6 Aug.      | <input type="checkbox"/>         | <input type="checkbox"/>                      |
| 7 Aug.      | <input type="checkbox"/>         | <input type="checkbox"/>                      |
| 8 Aug.      | <input type="checkbox"/>         | <input type="checkbox"/>                      |
| 9 Aug.      | <input type="checkbox"/>         | <input type="checkbox"/>                      |
| 10 Aug.     | <input type="checkbox"/>         | <input type="checkbox"/>                      |
| 11 Aug.     | <input type="checkbox"/>         | <input type="checkbox"/>                      |
| 12 Aug.     | <input type="checkbox"/>         | <input type="checkbox"/>                      |
| 13 Aug.     | <input type="checkbox"/>         | <input type="checkbox"/>                      |
| 14 Aug.     | <input type="checkbox"/>         | <input type="checkbox"/>                      |
| 15 Aug.     | <input type="checkbox"/>         | <input type="checkbox"/>                      |
| 16 Aug.     | <input type="checkbox"/>         | <input type="checkbox"/>                      |
| 17 Aug.     | <input type="checkbox"/>         | <input type="checkbox"/>                      |
| 18 Aug.     | <input type="checkbox"/>         | <input type="checkbox"/>                      |
| 19 Aug.     | <input type="checkbox"/>         | <input type="checkbox"/>                      |
| 20 Aug.     | <input type="checkbox"/>         | <input type="checkbox"/>                      |
| 21 Aug.     | <input type="checkbox"/>         | <input type="checkbox"/>                      |
| 22 Aug.     | <input type="checkbox"/>         | <input type="checkbox"/>                      |
| 23 Aug.     | <input type="checkbox"/>         | <input type="checkbox"/>                      |
| 24 Aug.     | <input type="checkbox"/>         | <input type="checkbox"/>                      |
| 25 Aug.     | <input type="checkbox"/>         | <input type="checkbox"/>                      |
| 26 Aug.     | <input type="checkbox"/>         | <input type="checkbox"/>                      |
| 27 Aug.     | <input type="checkbox"/>         | <input type="checkbox"/>                      |
| 28 Aug.     | <input type="checkbox"/>         | <input type="checkbox"/>                      |
| 29 Aug.     | <input type="checkbox"/>         | <input type="checkbox"/>                      |
| 30 Aug.     | <input type="checkbox"/>         | <input type="checkbox"/>                      |
| 31 Aug.     | <input type="checkbox"/>         | <input type="checkbox"/>                      |

I did not manage my own medication from \_\_\_\_\_ / \_\_\_\_\_ / \_\_\_\_\_ to \_\_\_\_\_ / \_\_\_\_\_ / \_\_\_\_\_

Reason: \_\_\_\_\_  
\_\_\_\_\_

# Monthly overview September

09

Monthly overview September

| Year: _____ | I encountered<br><b>PROBLEMS</b> | I did <b>NOT</b><br>encounter any<br>problems |
|-------------|----------------------------------|-----------------------------------------------|
| 1 Sept.     | <input type="checkbox"/>         | <input type="checkbox"/>                      |
| 2 Sept.     | <input type="checkbox"/>         | <input type="checkbox"/>                      |
| 3 Sept.     | <input type="checkbox"/>         | <input type="checkbox"/>                      |
| 4 Sept.     | <input type="checkbox"/>         | <input type="checkbox"/>                      |
| 5 Sept.     | <input type="checkbox"/>         | <input type="checkbox"/>                      |
| 6 Sept.     | <input type="checkbox"/>         | <input type="checkbox"/>                      |
| 7 Sept.     | <input type="checkbox"/>         | <input type="checkbox"/>                      |
| 8 Sept.     | <input type="checkbox"/>         | <input type="checkbox"/>                      |
| 9 Sept.     | <input type="checkbox"/>         | <input type="checkbox"/>                      |
| 10 Sept.    | <input type="checkbox"/>         | <input type="checkbox"/>                      |
| 11 Sept.    | <input type="checkbox"/>         | <input type="checkbox"/>                      |
| 12 Sept.    | <input type="checkbox"/>         | <input type="checkbox"/>                      |
| 13 Sept.    | <input type="checkbox"/>         | <input type="checkbox"/>                      |
| 14 Sept.    | <input type="checkbox"/>         | <input type="checkbox"/>                      |
| 15 Sept.    | <input type="checkbox"/>         | <input type="checkbox"/>                      |
| 16 Sept.    | <input type="checkbox"/>         | <input type="checkbox"/>                      |
| 17 Sept.    | <input type="checkbox"/>         | <input type="checkbox"/>                      |
| 18 Sept.    | <input type="checkbox"/>         | <input type="checkbox"/>                      |
| 19 Sept.    | <input type="checkbox"/>         | <input type="checkbox"/>                      |
| 20 Sept.    | <input type="checkbox"/>         | <input type="checkbox"/>                      |
| 21 Sept.    | <input type="checkbox"/>         | <input type="checkbox"/>                      |
| 22 Sept.    | <input type="checkbox"/>         | <input type="checkbox"/>                      |
| 23 Sept.    | <input type="checkbox"/>         | <input type="checkbox"/>                      |
| 24 Sept.    | <input type="checkbox"/>         | <input type="checkbox"/>                      |
| 25 Sept.    | <input type="checkbox"/>         | <input type="checkbox"/>                      |
| 26 Sept.    | <input type="checkbox"/>         | <input type="checkbox"/>                      |
| 27 Sept.    | <input type="checkbox"/>         | <input type="checkbox"/>                      |
| 28 Sept.    | <input type="checkbox"/>         | <input type="checkbox"/>                      |
| 29 Sept.    | <input type="checkbox"/>         | <input type="checkbox"/>                      |
| 30 Sept.    | <input type="checkbox"/>         | <input type="checkbox"/>                      |

I did not manage my own medication from \_\_\_\_\_ / \_\_\_\_\_ / \_\_\_\_\_ to \_\_\_\_\_ / \_\_\_\_\_ / \_\_\_\_\_

Reason: \_\_\_\_\_  
 \_\_\_\_\_

# Monthly overview October

10

Monthly overview October

| Year: _____ | I encountered<br><b>PROBLEMS</b> | I did <b>NOT</b><br>encounter any<br>problems |
|-------------|----------------------------------|-----------------------------------------------|
| 1 Oct.      | <input type="checkbox"/>         | <input type="checkbox"/>                      |
| 2 Oct.      | <input type="checkbox"/>         | <input type="checkbox"/>                      |
| 3 Oct.      | <input type="checkbox"/>         | <input type="checkbox"/>                      |
| 4 Oct.      | <input type="checkbox"/>         | <input type="checkbox"/>                      |
| 5 Oct.      | <input type="checkbox"/>         | <input type="checkbox"/>                      |
| 6 Oct.      | <input type="checkbox"/>         | <input type="checkbox"/>                      |
| 7 Oct.      | <input type="checkbox"/>         | <input type="checkbox"/>                      |
| 8 Oct.      | <input type="checkbox"/>         | <input type="checkbox"/>                      |
| 9 Oct.      | <input type="checkbox"/>         | <input type="checkbox"/>                      |
| 10 Oct.     | <input type="checkbox"/>         | <input type="checkbox"/>                      |
| 11 Oct.     | <input type="checkbox"/>         | <input type="checkbox"/>                      |
| 12 Oct.     | <input type="checkbox"/>         | <input type="checkbox"/>                      |
| 13 Oct.     | <input type="checkbox"/>         | <input type="checkbox"/>                      |
| 14 Oct.     | <input type="checkbox"/>         | <input type="checkbox"/>                      |
| 15 Oct.     | <input type="checkbox"/>         | <input type="checkbox"/>                      |
| 16 Oct.     | <input type="checkbox"/>         | <input type="checkbox"/>                      |
| 17 Oct.     | <input type="checkbox"/>         | <input type="checkbox"/>                      |
| 18 Oct.     | <input type="checkbox"/>         | <input type="checkbox"/>                      |
| 19 Oct.     | <input type="checkbox"/>         | <input type="checkbox"/>                      |
| 20 Oct.     | <input type="checkbox"/>         | <input type="checkbox"/>                      |
| 21 Oct.     | <input type="checkbox"/>         | <input type="checkbox"/>                      |
| 22 Oct.     | <input type="checkbox"/>         | <input type="checkbox"/>                      |
| 23 Oct.     | <input type="checkbox"/>         | <input type="checkbox"/>                      |
| 24 Oct.     | <input type="checkbox"/>         | <input type="checkbox"/>                      |
| 25 Oct.     | <input type="checkbox"/>         | <input type="checkbox"/>                      |
| 26 Oct.     | <input type="checkbox"/>         | <input type="checkbox"/>                      |
| 27 Oct.     | <input type="checkbox"/>         | <input type="checkbox"/>                      |
| 28 Oct.     | <input type="checkbox"/>         | <input type="checkbox"/>                      |
| 29 Oct.     | <input type="checkbox"/>         | <input type="checkbox"/>                      |
| 30 Oct.     | <input type="checkbox"/>         | <input type="checkbox"/>                      |
| 31 Oct.     | <input type="checkbox"/>         | <input type="checkbox"/>                      |

I did not manage my own medication from \_\_\_\_\_ / \_\_\_\_\_ / \_\_\_\_\_ to \_\_\_\_\_ / \_\_\_\_\_ / \_\_\_\_\_

Reason: \_\_\_\_\_  
\_\_\_\_\_

# Monthly overview November

11

Monthly overview November

| Year: _____ | I encountered<br><b>PROBLEMS</b> | I did <b>NOT</b><br>encounter any<br>problems |
|-------------|----------------------------------|-----------------------------------------------|
| 1 Nov.      | <input type="checkbox"/>         | <input type="checkbox"/>                      |
| 2 Nov.      | <input type="checkbox"/>         | <input type="checkbox"/>                      |
| 3 Nov.      | <input type="checkbox"/>         | <input type="checkbox"/>                      |
| 4 Nov.      | <input type="checkbox"/>         | <input type="checkbox"/>                      |
| 5 Nov.      | <input type="checkbox"/>         | <input type="checkbox"/>                      |
| 6 Nov.      | <input type="checkbox"/>         | <input type="checkbox"/>                      |
| 7 Nov.      | <input type="checkbox"/>         | <input type="checkbox"/>                      |
| 8 Nov.      | <input type="checkbox"/>         | <input type="checkbox"/>                      |
| 9 Nov.      | <input type="checkbox"/>         | <input type="checkbox"/>                      |
| 10 Nov.     | <input type="checkbox"/>         | <input type="checkbox"/>                      |
| 11 Nov.     | <input type="checkbox"/>         | <input type="checkbox"/>                      |
| 12 Nov.     | <input type="checkbox"/>         | <input type="checkbox"/>                      |
| 13 Nov.     | <input type="checkbox"/>         | <input type="checkbox"/>                      |
| 14 Nov.     | <input type="checkbox"/>         | <input type="checkbox"/>                      |
| 15 Nov.     | <input type="checkbox"/>         | <input type="checkbox"/>                      |
| 16 Nov.     | <input type="checkbox"/>         | <input type="checkbox"/>                      |
| 17 Nov.     | <input type="checkbox"/>         | <input type="checkbox"/>                      |
| 18 Nov.     | <input type="checkbox"/>         | <input type="checkbox"/>                      |
| 19 Nov.     | <input type="checkbox"/>         | <input type="checkbox"/>                      |
| 20 Nov.     | <input type="checkbox"/>         | <input type="checkbox"/>                      |
| 21 Nov.     | <input type="checkbox"/>         | <input type="checkbox"/>                      |
| 22 Nov.     | <input type="checkbox"/>         | <input type="checkbox"/>                      |
| 23 Nov.     | <input type="checkbox"/>         | <input type="checkbox"/>                      |
| 24 Nov.     | <input type="checkbox"/>         | <input type="checkbox"/>                      |
| 25 Nov.     | <input type="checkbox"/>         | <input type="checkbox"/>                      |
| 26 Nov.     | <input type="checkbox"/>         | <input type="checkbox"/>                      |
| 27 Nov.     | <input type="checkbox"/>         | <input type="checkbox"/>                      |
| 28 Nov.     | <input type="checkbox"/>         | <input type="checkbox"/>                      |
| 29 Nov.     | <input type="checkbox"/>         | <input type="checkbox"/>                      |
| 30 Nov.     | <input type="checkbox"/>         | <input type="checkbox"/>                      |

I did not manage my own medication from \_\_\_\_\_ / \_\_\_\_\_ / \_\_\_\_\_ to \_\_\_\_\_ / \_\_\_\_\_ / \_\_\_\_\_

Reason: \_\_\_\_\_  
\_\_\_\_\_

# Monthly overview December

12

Monthly overview December

| Year: _____ | I encountered<br><b>PROBLEMS</b> | I did <b>NOT</b><br>encounter any<br>problems |
|-------------|----------------------------------|-----------------------------------------------|
| 1 Dec.      | <input type="checkbox"/>         | <input type="checkbox"/>                      |
| 2 Dec.      | <input type="checkbox"/>         | <input type="checkbox"/>                      |
| 3 Dec.      | <input type="checkbox"/>         | <input type="checkbox"/>                      |
| 4 Dec.      | <input type="checkbox"/>         | <input type="checkbox"/>                      |
| 5 Dec.      | <input type="checkbox"/>         | <input type="checkbox"/>                      |
| 6 Dec.      | <input type="checkbox"/>         | <input type="checkbox"/>                      |
| 7 Dec.      | <input type="checkbox"/>         | <input type="checkbox"/>                      |
| 8 Dec.      | <input type="checkbox"/>         | <input type="checkbox"/>                      |
| 9 Dec.      | <input type="checkbox"/>         | <input type="checkbox"/>                      |
| 10 Dec.     | <input type="checkbox"/>         | <input type="checkbox"/>                      |
| 11 Dec.     | <input type="checkbox"/>         | <input type="checkbox"/>                      |
| 12 Dec.     | <input type="checkbox"/>         | <input type="checkbox"/>                      |
| 13 Dec.     | <input type="checkbox"/>         | <input type="checkbox"/>                      |
| 14 Dec.     | <input type="checkbox"/>         | <input type="checkbox"/>                      |
| 15 Dec.     | <input type="checkbox"/>         | <input type="checkbox"/>                      |
| 16 Dec.     | <input type="checkbox"/>         | <input type="checkbox"/>                      |
| 17 Dec.     | <input type="checkbox"/>         | <input type="checkbox"/>                      |
| 18 Dec.     | <input type="checkbox"/>         | <input type="checkbox"/>                      |
| 19 Dec.     | <input type="checkbox"/>         | <input type="checkbox"/>                      |
| 20 Dec.     | <input type="checkbox"/>         | <input type="checkbox"/>                      |
| 21 Dec.     | <input type="checkbox"/>         | <input type="checkbox"/>                      |
| 22 Dec.     | <input type="checkbox"/>         | <input type="checkbox"/>                      |
| 23 Dec.     | <input type="checkbox"/>         | <input type="checkbox"/>                      |
| 24 Dec.     | <input type="checkbox"/>         | <input type="checkbox"/>                      |
| 25 Dec.     | <input type="checkbox"/>         | <input type="checkbox"/>                      |
| 26 Dec.     | <input type="checkbox"/>         | <input type="checkbox"/>                      |
| 27 Dec.     | <input type="checkbox"/>         | <input type="checkbox"/>                      |
| 28 Dec.     | <input type="checkbox"/>         | <input type="checkbox"/>                      |
| 29 Dec.     | <input type="checkbox"/>         | <input type="checkbox"/>                      |
| 30 Dec.     | <input type="checkbox"/>         | <input type="checkbox"/>                      |
| 31 Dec.     | <input type="checkbox"/>         | <input type="checkbox"/>                      |

I did not manage my own medication from \_\_\_\_\_ / \_\_\_\_\_ / \_\_\_\_\_ to \_\_\_\_\_ / \_\_\_\_\_ / \_\_\_\_\_

Reason: \_\_\_\_\_  
\_\_\_\_\_

# Monthly overview January

01

Monthly overview January

| Year: _____ | I encountered<br><b>PROBLEMS</b> | I did <b>NOT</b><br>encounter any<br>problems |
|-------------|----------------------------------|-----------------------------------------------|
| 1 Jan.      | <input type="checkbox"/>         | <input type="checkbox"/>                      |
| 2 Jan.      | <input type="checkbox"/>         | <input type="checkbox"/>                      |
| 3 Jan.      | <input type="checkbox"/>         | <input type="checkbox"/>                      |
| 4 Jan.      | <input type="checkbox"/>         | <input type="checkbox"/>                      |
| 5 Jan.      | <input type="checkbox"/>         | <input type="checkbox"/>                      |
| 6 Jan.      | <input type="checkbox"/>         | <input type="checkbox"/>                      |
| 7 Jan.      | <input type="checkbox"/>         | <input type="checkbox"/>                      |
| 8 Jan.      | <input type="checkbox"/>         | <input type="checkbox"/>                      |
| 9 Jan.      | <input type="checkbox"/>         | <input type="checkbox"/>                      |
| 10 Jan.     | <input type="checkbox"/>         | <input type="checkbox"/>                      |
| 11 Jan.     | <input type="checkbox"/>         | <input type="checkbox"/>                      |
| 12 Jan.     | <input type="checkbox"/>         | <input type="checkbox"/>                      |
| 13 Jan.     | <input type="checkbox"/>         | <input type="checkbox"/>                      |
| 14 Jan.     | <input type="checkbox"/>         | <input type="checkbox"/>                      |
| 15 Jan.     | <input type="checkbox"/>         | <input type="checkbox"/>                      |
| 16 Jan.     | <input type="checkbox"/>         | <input type="checkbox"/>                      |
| 17 Jan.     | <input type="checkbox"/>         | <input type="checkbox"/>                      |
| 18 Jan.     | <input type="checkbox"/>         | <input type="checkbox"/>                      |
| 19 Jan.     | <input type="checkbox"/>         | <input type="checkbox"/>                      |
| 20 Jan.     | <input type="checkbox"/>         | <input type="checkbox"/>                      |
| 21 Jan.     | <input type="checkbox"/>         | <input type="checkbox"/>                      |
| 22 Jan.     | <input type="checkbox"/>         | <input type="checkbox"/>                      |
| 23 Jan.     | <input type="checkbox"/>         | <input type="checkbox"/>                      |
| 24 Jan.     | <input type="checkbox"/>         | <input type="checkbox"/>                      |
| 25 Jan.     | <input type="checkbox"/>         | <input type="checkbox"/>                      |
| 26 Jan.     | <input type="checkbox"/>         | <input type="checkbox"/>                      |
| 27 Jan.     | <input type="checkbox"/>         | <input type="checkbox"/>                      |
| 28 Jan.     | <input type="checkbox"/>         | <input type="checkbox"/>                      |
| 29 Jan.     | <input type="checkbox"/>         | <input type="checkbox"/>                      |
| 30 Jan.     | <input type="checkbox"/>         | <input type="checkbox"/>                      |
| 31 Jan.     | <input type="checkbox"/>         | <input type="checkbox"/>                      |

I did not manage my own medication from \_\_\_\_\_ / \_\_\_\_\_ / \_\_\_\_\_ to \_\_\_\_\_ / \_\_\_\_\_ / \_\_\_\_\_

Reason: \_\_\_\_\_  
\_\_\_\_\_

# Monthly overview February

02

Monthly overview February

| Year: _____ | I encountered<br><b>PROBLEMS</b> | I did <b>NOT</b><br>encounter any<br>problems |
|-------------|----------------------------------|-----------------------------------------------|
| 1 Feb.      | <input type="checkbox"/>         | <input type="checkbox"/>                      |
| 2 Feb.      | <input type="checkbox"/>         | <input type="checkbox"/>                      |
| 3 Feb.      | <input type="checkbox"/>         | <input type="checkbox"/>                      |
| 4 Feb.      | <input type="checkbox"/>         | <input type="checkbox"/>                      |
| 5 Feb.      | <input type="checkbox"/>         | <input type="checkbox"/>                      |
| 6 Feb.      | <input type="checkbox"/>         | <input type="checkbox"/>                      |
| 7 Feb.      | <input type="checkbox"/>         | <input type="checkbox"/>                      |
| 8 Feb.      | <input type="checkbox"/>         | <input type="checkbox"/>                      |
| 9 Feb.      | <input type="checkbox"/>         | <input type="checkbox"/>                      |
| 10 Feb.     | <input type="checkbox"/>         | <input type="checkbox"/>                      |
| 11 Feb.     | <input type="checkbox"/>         | <input type="checkbox"/>                      |
| 12 Feb.     | <input type="checkbox"/>         | <input type="checkbox"/>                      |
| 13 Feb.     | <input type="checkbox"/>         | <input type="checkbox"/>                      |
| 14 Feb.     | <input type="checkbox"/>         | <input type="checkbox"/>                      |
| 15 Feb.     | <input type="checkbox"/>         | <input type="checkbox"/>                      |
| 16 Feb.     | <input type="checkbox"/>         | <input type="checkbox"/>                      |
| 17 Feb.     | <input type="checkbox"/>         | <input type="checkbox"/>                      |
| 18 Feb.     | <input type="checkbox"/>         | <input type="checkbox"/>                      |
| 19 Feb.     | <input type="checkbox"/>         | <input type="checkbox"/>                      |
| 20 Feb.     | <input type="checkbox"/>         | <input type="checkbox"/>                      |
| 21 Feb.     | <input type="checkbox"/>         | <input type="checkbox"/>                      |
| 22 Feb.     | <input type="checkbox"/>         | <input type="checkbox"/>                      |
| 23 Feb.     | <input type="checkbox"/>         | <input type="checkbox"/>                      |
| 24 Feb.     | <input type="checkbox"/>         | <input type="checkbox"/>                      |
| 25 Feb.     | <input type="checkbox"/>         | <input type="checkbox"/>                      |
| 26 Feb.     | <input type="checkbox"/>         | <input type="checkbox"/>                      |
| 27 Feb.     | <input type="checkbox"/>         | <input type="checkbox"/>                      |
| 28 Feb.     | <input type="checkbox"/>         | <input type="checkbox"/>                      |
| [29 Feb.]   | <input type="checkbox"/>         | <input type="checkbox"/>                      |

I did not manage my own medication from \_\_\_\_\_ / \_\_\_\_\_ / \_\_\_\_\_ to \_\_\_\_\_ / \_\_\_\_\_ / \_\_\_\_\_

Reason: \_\_\_\_\_



# Monthly overview March

03

Monthly overview March

| Year: _____ | I encountered<br><b>PROBLEMS</b> | I did <b>NOT</b><br>encounter any<br>problems |
|-------------|----------------------------------|-----------------------------------------------|
| 1 Mar.      | <input type="checkbox"/>         | <input type="checkbox"/>                      |
| 2 Mar.      | <input type="checkbox"/>         | <input type="checkbox"/>                      |
| 3 Mar.      | <input type="checkbox"/>         | <input type="checkbox"/>                      |
| 4 Mar.      | <input type="checkbox"/>         | <input type="checkbox"/>                      |
| 5 Mar.      | <input type="checkbox"/>         | <input type="checkbox"/>                      |
| 6 Mar.      | <input type="checkbox"/>         | <input type="checkbox"/>                      |
| 7 Mar.      | <input type="checkbox"/>         | <input type="checkbox"/>                      |
| 8 Mar.      | <input type="checkbox"/>         | <input type="checkbox"/>                      |
| 9 Mar.      | <input type="checkbox"/>         | <input type="checkbox"/>                      |
| 10 Mar.     | <input type="checkbox"/>         | <input type="checkbox"/>                      |
| 11 Mar.     | <input type="checkbox"/>         | <input type="checkbox"/>                      |
| 12 Mar.     | <input type="checkbox"/>         | <input type="checkbox"/>                      |
| 13 Mar.     | <input type="checkbox"/>         | <input type="checkbox"/>                      |
| 14 Mar.     | <input type="checkbox"/>         | <input type="checkbox"/>                      |
| 15 Mar.     | <input type="checkbox"/>         | <input type="checkbox"/>                      |
| 16 Mar.     | <input type="checkbox"/>         | <input type="checkbox"/>                      |
| 17 Mar.     | <input type="checkbox"/>         | <input type="checkbox"/>                      |
| 18 Mar.     | <input type="checkbox"/>         | <input type="checkbox"/>                      |
| 19 Mar.     | <input type="checkbox"/>         | <input type="checkbox"/>                      |
| 20 Mar.     | <input type="checkbox"/>         | <input type="checkbox"/>                      |
| 21 Mar.     | <input type="checkbox"/>         | <input type="checkbox"/>                      |
| 22 Mar.     | <input type="checkbox"/>         | <input type="checkbox"/>                      |
| 23 Mar.     | <input type="checkbox"/>         | <input type="checkbox"/>                      |
| 24 Mar.     | <input type="checkbox"/>         | <input type="checkbox"/>                      |
| 25 Mar.     | <input type="checkbox"/>         | <input type="checkbox"/>                      |
| 26 Mar.     | <input type="checkbox"/>         | <input type="checkbox"/>                      |
| 27 Mar.     | <input type="checkbox"/>         | <input type="checkbox"/>                      |
| 28 Mar.     | <input type="checkbox"/>         | <input type="checkbox"/>                      |
| 29 Mar.     | <input type="checkbox"/>         | <input type="checkbox"/>                      |
| 30 Mar.     | <input type="checkbox"/>         | <input type="checkbox"/>                      |
| 31 Mar.     | <input type="checkbox"/>         | <input type="checkbox"/>                      |

I did not manage my own medication from \_\_\_\_\_ / \_\_\_\_\_ / \_\_\_\_\_ to \_\_\_\_\_ / \_\_\_\_\_ / \_\_\_\_\_

Reason: \_\_\_\_\_  
\_\_\_\_\_

# Monthly overview April

04

Monthly overview April

| Year: _____ | I encountered<br><b>PROBLEMS</b> | I did <b>NOT</b><br>encounter any<br>problems |
|-------------|----------------------------------|-----------------------------------------------|
| 1 Apr.      | <input type="checkbox"/>         | <input type="checkbox"/>                      |
| 2 Apr.      | <input type="checkbox"/>         | <input type="checkbox"/>                      |
| 3 Apr.      | <input type="checkbox"/>         | <input type="checkbox"/>                      |
| 4 Apr.      | <input type="checkbox"/>         | <input type="checkbox"/>                      |
| 5 Apr.      | <input type="checkbox"/>         | <input type="checkbox"/>                      |
| 6 Apr.      | <input type="checkbox"/>         | <input type="checkbox"/>                      |
| 7 Apr.      | <input type="checkbox"/>         | <input type="checkbox"/>                      |
| 8 Apr.      | <input type="checkbox"/>         | <input type="checkbox"/>                      |
| 9 Apr.      | <input type="checkbox"/>         | <input type="checkbox"/>                      |
| 10 Apr.     | <input type="checkbox"/>         | <input type="checkbox"/>                      |
| 11 Apr.     | <input type="checkbox"/>         | <input type="checkbox"/>                      |
| 12 Apr.     | <input type="checkbox"/>         | <input type="checkbox"/>                      |
| 13 Apr.     | <input type="checkbox"/>         | <input type="checkbox"/>                      |
| 14 Apr.     | <input type="checkbox"/>         | <input type="checkbox"/>                      |
| 15 Apr.     | <input type="checkbox"/>         | <input type="checkbox"/>                      |
| 16 Apr.     | <input type="checkbox"/>         | <input type="checkbox"/>                      |
| 17 Apr.     | <input type="checkbox"/>         | <input type="checkbox"/>                      |
| 18 Apr.     | <input type="checkbox"/>         | <input type="checkbox"/>                      |
| 19 Apr.     | <input type="checkbox"/>         | <input type="checkbox"/>                      |
| 20 Apr.     | <input type="checkbox"/>         | <input type="checkbox"/>                      |
| 21 Apr.     | <input type="checkbox"/>         | <input type="checkbox"/>                      |
| 22 Apr.     | <input type="checkbox"/>         | <input type="checkbox"/>                      |
| 23 Apr.     | <input type="checkbox"/>         | <input type="checkbox"/>                      |
| 24 Apr.     | <input type="checkbox"/>         | <input type="checkbox"/>                      |
| 25 Apr.     | <input type="checkbox"/>         | <input type="checkbox"/>                      |
| 26 Apr.     | <input type="checkbox"/>         | <input type="checkbox"/>                      |
| 27 Apr.     | <input type="checkbox"/>         | <input type="checkbox"/>                      |
| 28 Apr.     | <input type="checkbox"/>         | <input type="checkbox"/>                      |
| 29 Apr.     | <input type="checkbox"/>         | <input type="checkbox"/>                      |
| 30 Apr.     | <input type="checkbox"/>         | <input type="checkbox"/>                      |

I did not manage my own medication from \_\_\_\_\_ / \_\_\_\_\_ / \_\_\_\_\_ to \_\_\_\_\_ / \_\_\_\_\_ / \_\_\_\_\_

Reason: \_\_\_\_\_  
\_\_\_\_\_

# Monthly overview May

| Year: _____ | I encountered<br><b>PROBLEMS</b> | I did <b>NOT</b><br>encounter any<br>problems |
|-------------|----------------------------------|-----------------------------------------------|
| 1 May       | <input type="checkbox"/>         | <input type="checkbox"/>                      |
| 2 May       | <input type="checkbox"/>         | <input type="checkbox"/>                      |
| 3 May       | <input type="checkbox"/>         | <input type="checkbox"/>                      |
| 4 May       | <input type="checkbox"/>         | <input type="checkbox"/>                      |
| 5 May       | <input type="checkbox"/>         | <input type="checkbox"/>                      |
| 6 May       | <input type="checkbox"/>         | <input type="checkbox"/>                      |
| 7 May       | <input type="checkbox"/>         | <input type="checkbox"/>                      |
| 8 May       | <input type="checkbox"/>         | <input type="checkbox"/>                      |
| 9 May       | <input type="checkbox"/>         | <input type="checkbox"/>                      |
| 10 May      | <input type="checkbox"/>         | <input type="checkbox"/>                      |
| 11 May      | <input type="checkbox"/>         | <input type="checkbox"/>                      |
| 12 May      | <input type="checkbox"/>         | <input type="checkbox"/>                      |
| 13 May      | <input type="checkbox"/>         | <input type="checkbox"/>                      |
| 14 May      | <input type="checkbox"/>         | <input type="checkbox"/>                      |
| 15 May      | <input type="checkbox"/>         | <input type="checkbox"/>                      |
| 16 May      | <input type="checkbox"/>         | <input type="checkbox"/>                      |
| 17 May      | <input type="checkbox"/>         | <input type="checkbox"/>                      |
| 18 May      | <input type="checkbox"/>         | <input type="checkbox"/>                      |
| 19 May      | <input type="checkbox"/>         | <input type="checkbox"/>                      |
| 20 May      | <input type="checkbox"/>         | <input type="checkbox"/>                      |
| 21 May      | <input type="checkbox"/>         | <input type="checkbox"/>                      |
| 22 May      | <input type="checkbox"/>         | <input type="checkbox"/>                      |
| 23 May      | <input type="checkbox"/>         | <input type="checkbox"/>                      |
| 24 May      | <input type="checkbox"/>         | <input type="checkbox"/>                      |
| 25 May      | <input type="checkbox"/>         | <input type="checkbox"/>                      |
| 26 May      | <input type="checkbox"/>         | <input type="checkbox"/>                      |
| 27 May      | <input type="checkbox"/>         | <input type="checkbox"/>                      |
| 28 May      | <input type="checkbox"/>         | <input type="checkbox"/>                      |
| 29 May      | <input type="checkbox"/>         | <input type="checkbox"/>                      |
| 30 May      | <input type="checkbox"/>         | <input type="checkbox"/>                      |
| 31 May      | <input type="checkbox"/>         | <input type="checkbox"/>                      |

I did not manage my own medication from \_\_\_\_\_ / \_\_\_\_\_ / \_\_\_\_\_ to \_\_\_\_\_ / \_\_\_\_\_ / \_\_\_\_\_

Reason: \_\_\_\_\_  
\_\_\_\_\_

# Monthly overview June

06

Monthly overview June

| Year: _____ | I encountered<br><b>PROBLEMS</b> | I did <b>NOT</b><br>encounter any<br>problems |
|-------------|----------------------------------|-----------------------------------------------|
| 1 Jun.      | <input type="checkbox"/>         | <input type="checkbox"/>                      |
| 2 Jun.      | <input type="checkbox"/>         | <input type="checkbox"/>                      |
| 3 Jun.      | <input type="checkbox"/>         | <input type="checkbox"/>                      |
| 4 Jun.      | <input type="checkbox"/>         | <input type="checkbox"/>                      |
| 5 Jun.      | <input type="checkbox"/>         | <input type="checkbox"/>                      |
| 6 Jun.      | <input type="checkbox"/>         | <input type="checkbox"/>                      |
| 7 Jun.      | <input type="checkbox"/>         | <input type="checkbox"/>                      |
| 8 Jun.      | <input type="checkbox"/>         | <input type="checkbox"/>                      |
| 9 Jun.      | <input type="checkbox"/>         | <input type="checkbox"/>                      |
| 10 Jun.     | <input type="checkbox"/>         | <input type="checkbox"/>                      |
| 11 Jun.     | <input type="checkbox"/>         | <input type="checkbox"/>                      |
| 12 Jun.     | <input type="checkbox"/>         | <input type="checkbox"/>                      |
| 13 Jun.     | <input type="checkbox"/>         | <input type="checkbox"/>                      |
| 14 Jun.     | <input type="checkbox"/>         | <input type="checkbox"/>                      |
| 15 Jun.     | <input type="checkbox"/>         | <input type="checkbox"/>                      |
| 16 Jun.     | <input type="checkbox"/>         | <input type="checkbox"/>                      |
| 17 Jun.     | <input type="checkbox"/>         | <input type="checkbox"/>                      |
| 18 Jun.     | <input type="checkbox"/>         | <input type="checkbox"/>                      |
| 19 Jun.     | <input type="checkbox"/>         | <input type="checkbox"/>                      |
| 20 Jun.     | <input type="checkbox"/>         | <input type="checkbox"/>                      |
| 21 Jun.     | <input type="checkbox"/>         | <input type="checkbox"/>                      |
| 22 Jun.     | <input type="checkbox"/>         | <input type="checkbox"/>                      |
| 23 Jun.     | <input type="checkbox"/>         | <input type="checkbox"/>                      |
| 24 Jun.     | <input type="checkbox"/>         | <input type="checkbox"/>                      |
| 25 Jun.     | <input type="checkbox"/>         | <input type="checkbox"/>                      |
| 26 Jun.     | <input type="checkbox"/>         | <input type="checkbox"/>                      |
| 27 Jun.     | <input type="checkbox"/>         | <input type="checkbox"/>                      |
| 28 Jun.     | <input type="checkbox"/>         | <input type="checkbox"/>                      |
| 29 Jun.     | <input type="checkbox"/>         | <input type="checkbox"/>                      |
| 30 Jun.     | <input type="checkbox"/>         | <input type="checkbox"/>                      |

I did not manage my own medication from \_\_\_\_\_ / \_\_\_\_ / \_\_\_\_ to \_\_\_\_\_ / \_\_\_\_ / \_\_\_\_

Reason: \_\_\_\_\_  
\_\_\_\_\_

# Monthly overview July

| Year: _____ | I encountered<br><b>PROBLEMS</b> | I did <b>NOT</b><br>encounter any<br>problems |
|-------------|----------------------------------|-----------------------------------------------|
| 1 Jul.      | <input type="checkbox"/>         | <input type="checkbox"/>                      |
| 2 Jul.      | <input type="checkbox"/>         | <input type="checkbox"/>                      |
| 3 Jul.      | <input type="checkbox"/>         | <input type="checkbox"/>                      |
| 4 Jul.      | <input type="checkbox"/>         | <input type="checkbox"/>                      |
| 5 Jul.      | <input type="checkbox"/>         | <input type="checkbox"/>                      |
| 6 Jul.      | <input type="checkbox"/>         | <input type="checkbox"/>                      |
| 7 Jul.      | <input type="checkbox"/>         | <input type="checkbox"/>                      |
| 8 Jul.      | <input type="checkbox"/>         | <input type="checkbox"/>                      |
| 9 Jul.      | <input type="checkbox"/>         | <input type="checkbox"/>                      |
| 10 Jul.     | <input type="checkbox"/>         | <input type="checkbox"/>                      |
| 11 Jul.     | <input type="checkbox"/>         | <input type="checkbox"/>                      |
| 12 Jul.     | <input type="checkbox"/>         | <input type="checkbox"/>                      |
| 13 Jul.     | <input type="checkbox"/>         | <input type="checkbox"/>                      |
| 14 Jul.     | <input type="checkbox"/>         | <input type="checkbox"/>                      |
| 15 Jul.     | <input type="checkbox"/>         | <input type="checkbox"/>                      |
| 16 Jul.     | <input type="checkbox"/>         | <input type="checkbox"/>                      |
| 17 Jul.     | <input type="checkbox"/>         | <input type="checkbox"/>                      |
| 18 Jul.     | <input type="checkbox"/>         | <input type="checkbox"/>                      |
| 19 Jul.     | <input type="checkbox"/>         | <input type="checkbox"/>                      |
| 20 Jul.     | <input type="checkbox"/>         | <input type="checkbox"/>                      |
| 21 Jul.     | <input type="checkbox"/>         | <input type="checkbox"/>                      |
| 22 Jul.     | <input type="checkbox"/>         | <input type="checkbox"/>                      |
| 23 Jul.     | <input type="checkbox"/>         | <input type="checkbox"/>                      |
| 24 Jul.     | <input type="checkbox"/>         | <input type="checkbox"/>                      |
| 25 Jul.     | <input type="checkbox"/>         | <input type="checkbox"/>                      |
| 26 Jul.     | <input type="checkbox"/>         | <input type="checkbox"/>                      |
| 27 Jul.     | <input type="checkbox"/>         | <input type="checkbox"/>                      |
| 28 Jul.     | <input type="checkbox"/>         | <input type="checkbox"/>                      |
| 29 Jul.     | <input type="checkbox"/>         | <input type="checkbox"/>                      |
| 30 Jul.     | <input type="checkbox"/>         | <input type="checkbox"/>                      |
| 31 Jul.     | <input type="checkbox"/>         | <input type="checkbox"/>                      |

I did not manage my own medication from \_\_\_\_\_ / \_\_\_\_\_ / \_\_\_\_\_ to \_\_\_\_\_ / \_\_\_\_\_ / \_\_\_\_\_

Reason: \_\_\_\_\_  
\_\_\_\_\_

# Monthly overview August

08

Monthly overview August

| Year: _____ | I encountered<br><b>PROBLEMS</b> | I did <b>NOT</b><br>encounter any<br>problems |
|-------------|----------------------------------|-----------------------------------------------|
| 1 Aug.      | <input type="checkbox"/>         | <input type="checkbox"/>                      |
| 2 Aug.      | <input type="checkbox"/>         | <input type="checkbox"/>                      |
| 3 Aug.      | <input type="checkbox"/>         | <input type="checkbox"/>                      |
| 4 Aug.      | <input type="checkbox"/>         | <input type="checkbox"/>                      |
| 5 Aug.      | <input type="checkbox"/>         | <input type="checkbox"/>                      |
| 6 Aug.      | <input type="checkbox"/>         | <input type="checkbox"/>                      |
| 7 Aug.      | <input type="checkbox"/>         | <input type="checkbox"/>                      |
| 8 Aug.      | <input type="checkbox"/>         | <input type="checkbox"/>                      |
| 9 Aug.      | <input type="checkbox"/>         | <input type="checkbox"/>                      |
| 10 Aug.     | <input type="checkbox"/>         | <input type="checkbox"/>                      |
| 11 Aug.     | <input type="checkbox"/>         | <input type="checkbox"/>                      |
| 12 Aug.     | <input type="checkbox"/>         | <input type="checkbox"/>                      |
| 13 Aug.     | <input type="checkbox"/>         | <input type="checkbox"/>                      |
| 14 Aug.     | <input type="checkbox"/>         | <input type="checkbox"/>                      |
| 15 Aug.     | <input type="checkbox"/>         | <input type="checkbox"/>                      |
| 16 Aug.     | <input type="checkbox"/>         | <input type="checkbox"/>                      |
| 17 Aug.     | <input type="checkbox"/>         | <input type="checkbox"/>                      |
| 18 Aug.     | <input type="checkbox"/>         | <input type="checkbox"/>                      |
| 19 Aug.     | <input type="checkbox"/>         | <input type="checkbox"/>                      |
| 20 Aug.     | <input type="checkbox"/>         | <input type="checkbox"/>                      |
| 21 Aug.     | <input type="checkbox"/>         | <input type="checkbox"/>                      |
| 22 Aug.     | <input type="checkbox"/>         | <input type="checkbox"/>                      |
| 23 Aug.     | <input type="checkbox"/>         | <input type="checkbox"/>                      |
| 24 Aug.     | <input type="checkbox"/>         | <input type="checkbox"/>                      |
| 25 Aug.     | <input type="checkbox"/>         | <input type="checkbox"/>                      |
| 26 Aug.     | <input type="checkbox"/>         | <input type="checkbox"/>                      |
| 27 Aug.     | <input type="checkbox"/>         | <input type="checkbox"/>                      |
| 28 Aug.     | <input type="checkbox"/>         | <input type="checkbox"/>                      |
| 29 Aug.     | <input type="checkbox"/>         | <input type="checkbox"/>                      |
| 30 Aug.     | <input type="checkbox"/>         | <input type="checkbox"/>                      |
| 31 Aug.     | <input type="checkbox"/>         | <input type="checkbox"/>                      |

I did not manage my own medication from \_\_\_\_\_ / \_\_\_\_ / \_\_\_\_ to \_\_\_\_\_ / \_\_\_\_ / \_\_\_\_

Reason: \_\_\_\_\_  
\_\_\_\_\_

# Monthly overview September

09

| Year: _____ | I encountered<br><b>PROBLEMS</b> | I did <b>NOT</b><br>encounter any<br>problems |
|-------------|----------------------------------|-----------------------------------------------|
| 1 Sept.     | <input type="checkbox"/>         | <input type="checkbox"/>                      |
| 2 Sept.     | <input type="checkbox"/>         | <input type="checkbox"/>                      |
| 3 Sept.     | <input type="checkbox"/>         | <input type="checkbox"/>                      |
| 4 Sept.     | <input type="checkbox"/>         | <input type="checkbox"/>                      |
| 5 Sept.     | <input type="checkbox"/>         | <input type="checkbox"/>                      |
| 6 Sept.     | <input type="checkbox"/>         | <input type="checkbox"/>                      |
| 7 Sept.     | <input type="checkbox"/>         | <input type="checkbox"/>                      |
| 8 Sept.     | <input type="checkbox"/>         | <input type="checkbox"/>                      |
| 9 Sept.     | <input type="checkbox"/>         | <input type="checkbox"/>                      |
| 10 Sept.    | <input type="checkbox"/>         | <input type="checkbox"/>                      |
| 11 Sept.    | <input type="checkbox"/>         | <input type="checkbox"/>                      |
| 12 Sept.    | <input type="checkbox"/>         | <input type="checkbox"/>                      |
| 13 Sept.    | <input type="checkbox"/>         | <input type="checkbox"/>                      |
| 14 Sept.    | <input type="checkbox"/>         | <input type="checkbox"/>                      |
| 15 Sept.    | <input type="checkbox"/>         | <input type="checkbox"/>                      |
| 16 Sept.    | <input type="checkbox"/>         | <input type="checkbox"/>                      |
| 17 Sept.    | <input type="checkbox"/>         | <input type="checkbox"/>                      |
| 18 Sept.    | <input type="checkbox"/>         | <input type="checkbox"/>                      |
| 19 Sept.    | <input type="checkbox"/>         | <input type="checkbox"/>                      |
| 20 Sept.    | <input type="checkbox"/>         | <input type="checkbox"/>                      |
| 21 Sept.    | <input type="checkbox"/>         | <input type="checkbox"/>                      |
| 22 Sept.    | <input type="checkbox"/>         | <input type="checkbox"/>                      |
| 23 Sept.    | <input type="checkbox"/>         | <input type="checkbox"/>                      |
| 24 Sept.    | <input type="checkbox"/>         | <input type="checkbox"/>                      |
| 25 Sept.    | <input type="checkbox"/>         | <input type="checkbox"/>                      |
| 26 Sept.    | <input type="checkbox"/>         | <input type="checkbox"/>                      |
| 27 Sept.    | <input type="checkbox"/>         | <input type="checkbox"/>                      |
| 28 Sept.    | <input type="checkbox"/>         | <input type="checkbox"/>                      |
| 29 Sept.    | <input type="checkbox"/>         | <input type="checkbox"/>                      |
| 30 Sept.    | <input type="checkbox"/>         | <input type="checkbox"/>                      |

I did not manage my own medication from \_\_\_\_\_ / \_\_\_\_\_ / \_\_\_\_\_ to \_\_\_\_\_ / \_\_\_\_\_ / \_\_\_\_\_

Reason: \_\_\_\_\_  
 \_\_\_\_\_

# Monthly overview October

10

Monthly overview October

| Year: _____ | I encountered<br><b>PROBLEMS</b> | I did <b>NOT</b><br>encounter any<br>problems |
|-------------|----------------------------------|-----------------------------------------------|
| 1 Oct.      | <input type="checkbox"/>         | <input type="checkbox"/>                      |
| 2 Oct.      | <input type="checkbox"/>         | <input type="checkbox"/>                      |
| 3 Oct.      | <input type="checkbox"/>         | <input type="checkbox"/>                      |
| 4 Oct.      | <input type="checkbox"/>         | <input type="checkbox"/>                      |
| 5 Oct.      | <input type="checkbox"/>         | <input type="checkbox"/>                      |
| 6 Oct.      | <input type="checkbox"/>         | <input type="checkbox"/>                      |
| 7 Oct.      | <input type="checkbox"/>         | <input type="checkbox"/>                      |
| 8 Oct.      | <input type="checkbox"/>         | <input type="checkbox"/>                      |
| 9 Oct.      | <input type="checkbox"/>         | <input type="checkbox"/>                      |
| 10 Oct.     | <input type="checkbox"/>         | <input type="checkbox"/>                      |
| 11 Oct.     | <input type="checkbox"/>         | <input type="checkbox"/>                      |
| 12 Oct.     | <input type="checkbox"/>         | <input type="checkbox"/>                      |
| 13 Oct.     | <input type="checkbox"/>         | <input type="checkbox"/>                      |
| 14 Oct.     | <input type="checkbox"/>         | <input type="checkbox"/>                      |
| 15 Oct.     | <input type="checkbox"/>         | <input type="checkbox"/>                      |
| 16 Oct.     | <input type="checkbox"/>         | <input type="checkbox"/>                      |
| 17 Oct.     | <input type="checkbox"/>         | <input type="checkbox"/>                      |
| 18 Oct.     | <input type="checkbox"/>         | <input type="checkbox"/>                      |
| 19 Oct.     | <input type="checkbox"/>         | <input type="checkbox"/>                      |
| 20 Oct.     | <input type="checkbox"/>         | <input type="checkbox"/>                      |
| 21 Oct.     | <input type="checkbox"/>         | <input type="checkbox"/>                      |
| 22 Oct.     | <input type="checkbox"/>         | <input type="checkbox"/>                      |
| 23 Oct.     | <input type="checkbox"/>         | <input type="checkbox"/>                      |
| 24 Oct.     | <input type="checkbox"/>         | <input type="checkbox"/>                      |
| 25 Oct.     | <input type="checkbox"/>         | <input type="checkbox"/>                      |
| 26 Oct.     | <input type="checkbox"/>         | <input type="checkbox"/>                      |
| 27 Oct.     | <input type="checkbox"/>         | <input type="checkbox"/>                      |
| 28 Oct.     | <input type="checkbox"/>         | <input type="checkbox"/>                      |
| 29 Oct.     | <input type="checkbox"/>         | <input type="checkbox"/>                      |
| 30 Oct.     | <input type="checkbox"/>         | <input type="checkbox"/>                      |
| 31 Oct.     | <input type="checkbox"/>         | <input type="checkbox"/>                      |

I did not manage my own medication from \_\_\_\_\_ / \_\_\_\_ / \_\_\_\_ to \_\_\_\_ / \_\_\_\_ / \_\_\_\_

Reason: \_\_\_\_\_  
\_\_\_\_\_



# Monthly overview November

| Year: _____ | I encountered<br><b>PROBLEMS</b> | I did <b>NOT</b><br>encounter any<br>problems |
|-------------|----------------------------------|-----------------------------------------------|
| 1 Nov.      | <input type="checkbox"/>         | <input type="checkbox"/>                      |
| 2 Nov.      | <input type="checkbox"/>         | <input type="checkbox"/>                      |
| 3 Nov.      | <input type="checkbox"/>         | <input type="checkbox"/>                      |
| 4 Nov.      | <input type="checkbox"/>         | <input type="checkbox"/>                      |
| 5 Nov.      | <input type="checkbox"/>         | <input type="checkbox"/>                      |
| 6 Nov.      | <input type="checkbox"/>         | <input type="checkbox"/>                      |
| 7 Nov.      | <input type="checkbox"/>         | <input type="checkbox"/>                      |
| 8 Nov.      | <input type="checkbox"/>         | <input type="checkbox"/>                      |
| 9 Nov.      | <input type="checkbox"/>         | <input type="checkbox"/>                      |
| 10 Nov.     | <input type="checkbox"/>         | <input type="checkbox"/>                      |
| 11 Nov.     | <input type="checkbox"/>         | <input type="checkbox"/>                      |
| 12 Nov.     | <input type="checkbox"/>         | <input type="checkbox"/>                      |
| 13 Nov.     | <input type="checkbox"/>         | <input type="checkbox"/>                      |
| 14 Nov.     | <input type="checkbox"/>         | <input type="checkbox"/>                      |
| 15 Nov.     | <input type="checkbox"/>         | <input type="checkbox"/>                      |
| 16 Nov.     | <input type="checkbox"/>         | <input type="checkbox"/>                      |
| 17 Nov.     | <input type="checkbox"/>         | <input type="checkbox"/>                      |
| 18 Nov.     | <input type="checkbox"/>         | <input type="checkbox"/>                      |
| 19 Nov.     | <input type="checkbox"/>         | <input type="checkbox"/>                      |
| 20 Nov.     | <input type="checkbox"/>         | <input type="checkbox"/>                      |
| 21 Nov.     | <input type="checkbox"/>         | <input type="checkbox"/>                      |
| 22 Nov.     | <input type="checkbox"/>         | <input type="checkbox"/>                      |
| 23 Nov.     | <input type="checkbox"/>         | <input type="checkbox"/>                      |
| 24 Nov.     | <input type="checkbox"/>         | <input type="checkbox"/>                      |
| 25 Nov.     | <input type="checkbox"/>         | <input type="checkbox"/>                      |
| 26 Nov.     | <input type="checkbox"/>         | <input type="checkbox"/>                      |
| 27 Nov.     | <input type="checkbox"/>         | <input type="checkbox"/>                      |
| 28 Nov.     | <input type="checkbox"/>         | <input type="checkbox"/>                      |
| 29 Nov.     | <input type="checkbox"/>         | <input type="checkbox"/>                      |
| 30 Nov.     | <input type="checkbox"/>         | <input type="checkbox"/>                      |

I did not manage my own medication from \_\_\_\_\_ / \_\_\_\_\_ / \_\_\_\_\_ to \_\_\_\_\_ / \_\_\_\_\_ / \_\_\_\_\_

Reason: \_\_\_\_\_  
\_\_\_\_\_

# Monthly overview December

12

Monthly overview December

| Year: _____ | I encountered<br><b>PROBLEMS</b> | I did <b>NOT</b><br>encounter any<br>problems |
|-------------|----------------------------------|-----------------------------------------------|
| 1 Dec.      | <input type="checkbox"/>         | <input type="checkbox"/>                      |
| 2 Dec.      | <input type="checkbox"/>         | <input type="checkbox"/>                      |
| 3 Dec.      | <input type="checkbox"/>         | <input type="checkbox"/>                      |
| 4 Dec.      | <input type="checkbox"/>         | <input type="checkbox"/>                      |
| 5 Dec.      | <input type="checkbox"/>         | <input type="checkbox"/>                      |
| 6 Dec.      | <input type="checkbox"/>         | <input type="checkbox"/>                      |
| 7 Dec.      | <input type="checkbox"/>         | <input type="checkbox"/>                      |
| 8 Dec.      | <input type="checkbox"/>         | <input type="checkbox"/>                      |
| 9 Dec.      | <input type="checkbox"/>         | <input type="checkbox"/>                      |
| 10 Dec.     | <input type="checkbox"/>         | <input type="checkbox"/>                      |
| 11 Dec.     | <input type="checkbox"/>         | <input type="checkbox"/>                      |
| 12 Dec.     | <input type="checkbox"/>         | <input type="checkbox"/>                      |
| 13 Dec.     | <input type="checkbox"/>         | <input type="checkbox"/>                      |
| 14 Dec.     | <input type="checkbox"/>         | <input type="checkbox"/>                      |
| 15 Dec.     | <input type="checkbox"/>         | <input type="checkbox"/>                      |
| 16 Dec.     | <input type="checkbox"/>         | <input type="checkbox"/>                      |
| 17 Dec.     | <input type="checkbox"/>         | <input type="checkbox"/>                      |
| 18 Dec.     | <input type="checkbox"/>         | <input type="checkbox"/>                      |
| 19 Dec.     | <input type="checkbox"/>         | <input type="checkbox"/>                      |
| 20 Dec.     | <input type="checkbox"/>         | <input type="checkbox"/>                      |
| 21 Dec.     | <input type="checkbox"/>         | <input type="checkbox"/>                      |
| 22 Dec.     | <input type="checkbox"/>         | <input type="checkbox"/>                      |
| 23 Dec.     | <input type="checkbox"/>         | <input type="checkbox"/>                      |
| 24 Dec.     | <input type="checkbox"/>         | <input type="checkbox"/>                      |
| 25 Dec.     | <input type="checkbox"/>         | <input type="checkbox"/>                      |
| 26 Dec.     | <input type="checkbox"/>         | <input type="checkbox"/>                      |
| 27 Dec.     | <input type="checkbox"/>         | <input type="checkbox"/>                      |
| 28 Dec.     | <input type="checkbox"/>         | <input type="checkbox"/>                      |
| 29 Dec.     | <input type="checkbox"/>         | <input type="checkbox"/>                      |
| 30 Dec.     | <input type="checkbox"/>         | <input type="checkbox"/>                      |
| 31 Dec.     | <input type="checkbox"/>         | <input type="checkbox"/>                      |

I did not manage my own medication from \_\_\_\_\_ / \_\_\_\_\_ / \_\_\_\_\_ to \_\_\_\_\_ / \_\_\_\_\_ / \_\_\_\_\_

Reason: \_\_\_\_\_  
\_\_\_\_\_

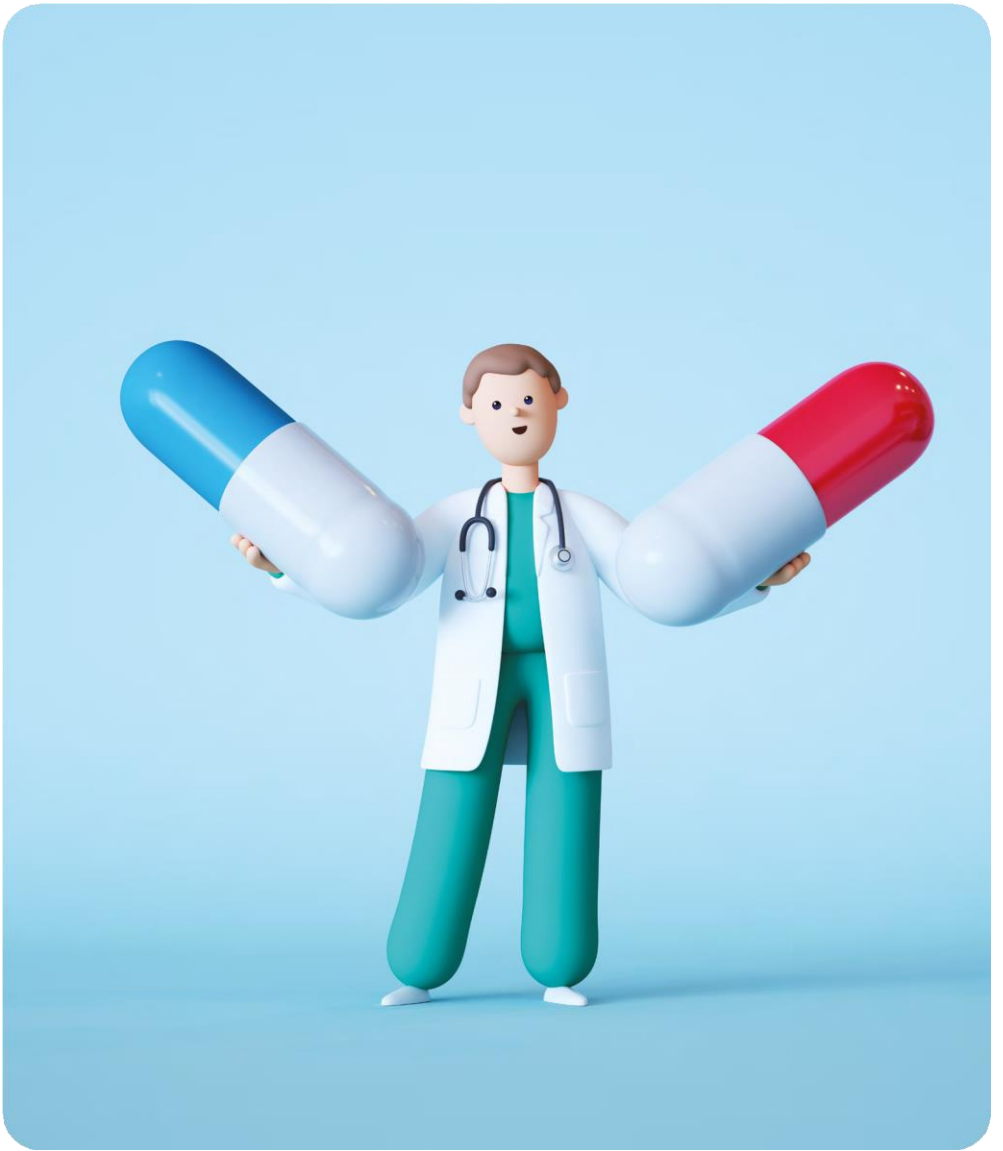

# Problem sheets

- You should only fill in a problem sheet if you experienced a problem with your medication on a particular day or during a particular period. If you did not experience any problems, do not fill in a problem sheet.
- At the top, always note the date of the day you experienced the problems (e.g. 01/01/2021) or, if the problems persist, you can also mention a period (e.g. from 01/01/2021 to 14/01/2021).
- Indicate which problems you experienced and which medication they relate to.
- Note whether or not you took action (e.g. contacting your doctor, home care nurse, pharmacist, etc.).

Date: \_\_\_\_ / \_\_\_\_ / \_\_\_\_ or period from \_\_\_\_ / \_\_\_\_ / \_\_\_\_ to \_\_\_\_ / \_\_\_\_ / \_\_\_\_

| What problem did you encounter?                                                                                                                                                                                                                                                                                                                         | With which medication?                                                                                                                                                             | Did you take action?                                                                             |
|---------------------------------------------------------------------------------------------------------------------------------------------------------------------------------------------------------------------------------------------------------------------------------------------------------------------------------------------------------|------------------------------------------------------------------------------------------------------------------------------------------------------------------------------------|--------------------------------------------------------------------------------------------------|
| <b>a. Obtaining the medication</b>                                                                                                                                                                                                                                                                                                                      |                                                                                                                                                                                    |                                                                                                  |
| <input type="checkbox"/> Medication not in stock<br><input type="checkbox"/> Forgot to collect from the pharmacy<br><input type="checkbox"/> I am unable to go get my medication (restricted mobility, no help from others, etc.)<br><input type="checkbox"/> I cannot afford the medication<br><input type="checkbox"/> I had no prescription (refill) | <input type="checkbox"/> Pertains to all medicines<br><input type="checkbox"/> Pertains to specific medicines:<br>_____<br>_____<br>_____<br><input type="checkbox"/> I don't know | <input type="checkbox"/> No<br><input type="checkbox"/> Yes:<br>_____<br>_____<br>_____<br>_____ |
| <b>b. Side effects</b>                                                                                                                                                                                                                                                                                                                                  |                                                                                                                                                                                    |                                                                                                  |
|                                                                                                                                                                                                                                                                                                                                                         | <input type="checkbox"/> Pertains to all medicines<br><input type="checkbox"/> Pertains to specific medicines:<br>_____<br>_____<br>_____<br><input type="checkbox"/> I don't know | <input type="checkbox"/> No<br><input type="checkbox"/> Yes:<br>_____<br>_____<br>_____<br>_____ |

| What problem did you encounter?                                                                                                                                                                             | With which medication?                                                                                                                                                             | Did you take action?                                                                    |
|-------------------------------------------------------------------------------------------------------------------------------------------------------------------------------------------------------------|------------------------------------------------------------------------------------------------------------------------------------------------------------------------------------|-----------------------------------------------------------------------------------------|
| c. Problems with medication use                                                                                                                                                                             |                                                                                                                                                                                    |                                                                                         |
| <input type="checkbox"/> I took the wrong dose<br><input type="checkbox"/> More than prescribed<br><input type="checkbox"/> Less than prescribed<br><input type="checkbox"/> Other: _____<br>_____<br>_____ | <input type="checkbox"/> Pertains to all medicines<br><input type="checkbox"/> Pertains to specific medicines:<br>_____<br>_____<br>_____<br><input type="checkbox"/> I don't know | <input type="checkbox"/> No<br><input type="checkbox"/> Yes:<br>_____<br>_____<br>_____ |
| <input type="checkbox"/> Taken at the wrong time<br><input type="checkbox"/> Too early<br><input type="checkbox"/> Too late<br><input type="checkbox"/> Other: _____<br>_____<br>_____                      | <input type="checkbox"/> Pertains to all medicines<br><input type="checkbox"/> Pertains to specific medicines:<br>_____<br>_____<br>_____<br><input type="checkbox"/> I don't know | <input type="checkbox"/> No<br><input type="checkbox"/> Yes:<br>_____<br>_____<br>_____ |
| <input type="checkbox"/> Administered the wrong way                                                                                                                                                         | <input type="checkbox"/> Pertains to all medicines<br><input type="checkbox"/> Pertains to specific medicines:<br>_____<br>_____<br>_____<br><input type="checkbox"/> I don't know | <input type="checkbox"/> No<br><input type="checkbox"/> Yes:<br>_____<br>_____<br>_____ |

Date of completion: \_\_\_\_ / \_\_\_\_ / \_\_\_\_

| What problem did you encounter?                                                                              | With which medication?                                                                                                                                                             | Did you take action?                                                                    |
|--------------------------------------------------------------------------------------------------------------|------------------------------------------------------------------------------------------------------------------------------------------------------------------------------------|-----------------------------------------------------------------------------------------|
| <input type="checkbox"/> Forgot to take the medication                                                       | <input type="checkbox"/> Pertains to all medicines<br><input type="checkbox"/> Pertains to specific medicines:<br>_____<br>_____<br>_____<br><input type="checkbox"/> I don't know | <input type="checkbox"/> No<br><input type="checkbox"/> Yes:<br>_____<br>_____<br>_____ |
| <input type="checkbox"/> Difficult administration (problems swallowing, inhaling, applying, injecting, etc.) | <input type="checkbox"/> Pertains to all medicines<br><input type="checkbox"/> Pertains to specific medicines:<br>_____<br>_____<br>_____<br><input type="checkbox"/> I don't know | <input type="checkbox"/> No<br><input type="checkbox"/> Yes:<br>_____<br>_____<br>_____ |
| <b>d. Problems with packaging</b>                                                                            |                                                                                                                                                                                    |                                                                                         |
| <input type="checkbox"/> Difficulty opening the packaging                                                    | <input type="checkbox"/> Pertains to all medicines<br><input type="checkbox"/> Pertains to specific medicines:<br>_____<br>_____<br>_____<br><input type="checkbox"/> I don't know | <input type="checkbox"/> No<br><input type="checkbox"/> Yes:<br>_____<br>_____<br>_____ |

Date of completion: \_\_\_\_ / \_\_\_\_ / \_\_\_\_

| What problem did you encounter?                                                              | With which medication?                                                                                                                                                             | Did you take action?                                                                    |
|----------------------------------------------------------------------------------------------|------------------------------------------------------------------------------------------------------------------------------------------------------------------------------------|-----------------------------------------------------------------------------------------|
| <input type="checkbox"/> Storage issues (e.g. packaging was thrown away)                     | <input type="checkbox"/> Pertains to all medicines<br><input type="checkbox"/> Pertains to specific medicines:<br>_____<br>_____<br>_____<br><input type="checkbox"/> I don't know | <input type="checkbox"/> No<br><input type="checkbox"/> Yes:<br>_____<br>_____<br>_____ |
| <input type="checkbox"/> I cannot read or understand all the information about my medication | <input type="checkbox"/> Pertains to all medicines<br><input type="checkbox"/> Pertains to specific medicines:<br>_____<br>_____<br>_____<br><input type="checkbox"/> I don't know | <input type="checkbox"/> No<br><input type="checkbox"/> Yes:<br>_____<br>_____<br>_____ |
| <b>e. Other problems</b>                                                                     |                                                                                                                                                                                    |                                                                                         |
| _____<br>_____<br>_____<br>_____<br>_____                                                    | <input type="checkbox"/> Pertains to all medicines<br><input type="checkbox"/> Pertains to specific medicines:<br>_____<br>_____<br>_____<br><input type="checkbox"/> I don't know | <input type="checkbox"/> No<br><input type="checkbox"/> Yes:<br>_____<br>_____<br>_____ |



Date: \_\_\_\_ / \_\_\_\_ / \_\_\_\_ or period from \_\_\_\_ / \_\_\_\_ / \_\_\_\_ to \_\_\_\_ / \_\_\_\_ / \_\_\_\_

| What problem did you encounter?                                                                                                                                                                                                                                                                                                                         | With which medication?                                                                                                                                                             | Did you take action?                                                                             |
|---------------------------------------------------------------------------------------------------------------------------------------------------------------------------------------------------------------------------------------------------------------------------------------------------------------------------------------------------------|------------------------------------------------------------------------------------------------------------------------------------------------------------------------------------|--------------------------------------------------------------------------------------------------|
| <b>a. Obtaining the medication</b>                                                                                                                                                                                                                                                                                                                      |                                                                                                                                                                                    |                                                                                                  |
| <input type="checkbox"/> Medication not in stock<br><input type="checkbox"/> Forgot to collect from the pharmacy<br><input type="checkbox"/> I am unable to go get my medication (restricted mobility, no help from others, etc.)<br><input type="checkbox"/> I cannot afford the medication<br><input type="checkbox"/> I had no prescription (refill) | <input type="checkbox"/> Pertains to all medicines<br><input type="checkbox"/> Pertains to specific medicines:<br>_____<br>_____<br>_____<br><input type="checkbox"/> I don't know | <input type="checkbox"/> No<br><input type="checkbox"/> Yes:<br>_____<br>_____<br>_____<br>_____ |
| <b>b. Side effects</b>                                                                                                                                                                                                                                                                                                                                  |                                                                                                                                                                                    |                                                                                                  |
|                                                                                                                                                                                                                                                                                                                                                         | <input type="checkbox"/> Pertains to all medicines<br><input type="checkbox"/> Pertains to specific medicines:<br>_____<br>_____<br>_____<br><input type="checkbox"/> I don't know | <input type="checkbox"/> No<br><input type="checkbox"/> Yes:<br>_____<br>_____<br>_____<br>_____ |

| What problem did you encounter?                                                                                                                                                                                                                      | With which medication?                                                                                                                                                    | Did you take action?                                                                    |
|------------------------------------------------------------------------------------------------------------------------------------------------------------------------------------------------------------------------------------------------------|---------------------------------------------------------------------------------------------------------------------------------------------------------------------------|-----------------------------------------------------------------------------------------|
| c. Problems with medication use                                                                                                                                                                                                                      |                                                                                                                                                                           |                                                                                         |
| <input type="checkbox"/> I took the wrong dose <ul style="list-style-type: none"> <li><input type="checkbox"/> More than prescribed</li> <li><input type="checkbox"/> Less than prescribed</li> <li><input type="checkbox"/> Other: _____</li> </ul> | <input type="checkbox"/> Pertains to all medicines<br><input type="checkbox"/> Pertains to specific medicines:<br>_____<br>_____<br><input type="checkbox"/> I don't know | <input type="checkbox"/> No<br><input type="checkbox"/> Yes:<br>_____<br>_____<br>_____ |
| <input type="checkbox"/> Taken at the wrong time <ul style="list-style-type: none"> <li><input type="checkbox"/> Too early</li> <li><input type="checkbox"/> Too late</li> <li><input type="checkbox"/> Other: _____</li> </ul>                      | <input type="checkbox"/> Pertains to all medicines<br><input type="checkbox"/> Pertains to specific medicines:<br>_____<br>_____<br><input type="checkbox"/> I don't know | <input type="checkbox"/> No<br><input type="checkbox"/> Yes:<br>_____<br>_____<br>_____ |
| <input type="checkbox"/> Administered the wrong way                                                                                                                                                                                                  | <input type="checkbox"/> Pertains to all medicines<br><input type="checkbox"/> Pertains to specific medicines:<br>_____<br>_____<br><input type="checkbox"/> I don't know | <input type="checkbox"/> No<br><input type="checkbox"/> Yes:<br>_____<br>_____<br>_____ |

Date of completion: \_\_\_\_/\_\_\_\_/\_\_\_\_

| What problem did you encounter?                                                                              | With which medication?                                                                                                                                                             | Did you take action?                                                                    |
|--------------------------------------------------------------------------------------------------------------|------------------------------------------------------------------------------------------------------------------------------------------------------------------------------------|-----------------------------------------------------------------------------------------|
| <input type="checkbox"/> Forgot to take the medication                                                       | <input type="checkbox"/> Pertains to all medicines<br><input type="checkbox"/> Pertains to specific medicines:<br>_____<br>_____<br>_____<br><input type="checkbox"/> I don't know | <input type="checkbox"/> No<br><input type="checkbox"/> Yes:<br>_____<br>_____<br>_____ |
| <input type="checkbox"/> Difficult administration (problems swallowing, inhaling, applying, injecting, etc.) | <input type="checkbox"/> Pertains to all medicines<br><input type="checkbox"/> Pertains to specific medicines:<br>_____<br>_____<br>_____<br><input type="checkbox"/> I don't know | <input type="checkbox"/> No<br><input type="checkbox"/> Yes:<br>_____<br>_____<br>_____ |
| <b>d. Problems with packaging</b>                                                                            |                                                                                                                                                                                    |                                                                                         |
| <input type="checkbox"/> Difficulty opening the packaging                                                    | <input type="checkbox"/> Pertains to all medicines<br><input type="checkbox"/> Pertains to specific medicines:<br>_____<br>_____<br>_____<br><input type="checkbox"/> I don't know | <input type="checkbox"/> No<br><input type="checkbox"/> Yes:<br>_____<br>_____<br>_____ |

Date of completion: \_\_\_\_ / \_\_\_\_ / \_\_\_\_

| What problem did you encounter?                                                              | With which medication?                                                                                                                                                             | Did you take action?                                                                    |
|----------------------------------------------------------------------------------------------|------------------------------------------------------------------------------------------------------------------------------------------------------------------------------------|-----------------------------------------------------------------------------------------|
| <input type="checkbox"/> Storage issues (e.g. packaging was thrown away)                     | <input type="checkbox"/> Pertains to all medicines<br><input type="checkbox"/> Pertains to specific medicines:<br>_____<br>_____<br>_____<br><input type="checkbox"/> I don't know | <input type="checkbox"/> No<br><input type="checkbox"/> Yes:<br>_____<br>_____<br>_____ |
| <input type="checkbox"/> I cannot read or understand all the information about my medication | <input type="checkbox"/> Pertains to all medicines<br><input type="checkbox"/> Pertains to specific medicines:<br>_____<br>_____<br>_____<br><input type="checkbox"/> I don't know | <input type="checkbox"/> No<br><input type="checkbox"/> Yes:<br>_____<br>_____<br>_____ |
| <b>e. Other problems</b>                                                                     |                                                                                                                                                                                    |                                                                                         |
| _____<br>_____<br>_____<br>_____<br>_____                                                    | <input type="checkbox"/> Pertains to all medicines<br><input type="checkbox"/> Pertains to specific medicines:<br>_____<br>_____<br>_____<br><input type="checkbox"/> I don't know | <input type="checkbox"/> No<br><input type="checkbox"/> Yes:<br>_____<br>_____<br>_____ |

Date: \_\_\_\_ / \_\_\_\_ / \_\_\_\_ or period from \_\_\_\_ / \_\_\_\_ / \_\_\_\_ to \_\_\_\_ / \_\_\_\_ / \_\_\_\_

| What problem did you encounter?                                                                                                                                                                                                                                                                                                                         | With which medication?                                                                                                                                                             | Did you take action?                                                                             |
|---------------------------------------------------------------------------------------------------------------------------------------------------------------------------------------------------------------------------------------------------------------------------------------------------------------------------------------------------------|------------------------------------------------------------------------------------------------------------------------------------------------------------------------------------|--------------------------------------------------------------------------------------------------|
| <b>a. Obtaining the medication</b>                                                                                                                                                                                                                                                                                                                      |                                                                                                                                                                                    |                                                                                                  |
| <input type="checkbox"/> Medication not in stock<br><input type="checkbox"/> Forgot to collect from the pharmacy<br><input type="checkbox"/> I am unable to go get my medication (restricted mobility, no help from others, etc.)<br><input type="checkbox"/> I cannot afford the medication<br><input type="checkbox"/> I had no prescription (refill) | <input type="checkbox"/> Pertains to all medicines<br><input type="checkbox"/> Pertains to specific medicines:<br>_____<br>_____<br>_____<br><input type="checkbox"/> I don't know | <input type="checkbox"/> No<br><input type="checkbox"/> Yes:<br>_____<br>_____<br>_____<br>_____ |
| <b>b. Side effects</b>                                                                                                                                                                                                                                                                                                                                  |                                                                                                                                                                                    |                                                                                                  |
|                                                                                                                                                                                                                                                                                                                                                         | <input type="checkbox"/> Pertains to all medicines<br><input type="checkbox"/> Pertains to specific medicines:<br>_____<br>_____<br>_____<br><input type="checkbox"/> I don't know | <input type="checkbox"/> No<br><input type="checkbox"/> Yes:<br>_____<br>_____<br>_____<br>_____ |

| What problem did you encounter?                                                                                                                                                                                                                      | With which medication?                                                                                                                                                    | Did you take action?                                                                    |
|------------------------------------------------------------------------------------------------------------------------------------------------------------------------------------------------------------------------------------------------------|---------------------------------------------------------------------------------------------------------------------------------------------------------------------------|-----------------------------------------------------------------------------------------|
| c. Problems with medication use                                                                                                                                                                                                                      |                                                                                                                                                                           |                                                                                         |
| <input type="checkbox"/> I took the wrong dose <ul style="list-style-type: none"> <li><input type="checkbox"/> More than prescribed</li> <li><input type="checkbox"/> Less than prescribed</li> <li><input type="checkbox"/> Other: _____</li> </ul> | <input type="checkbox"/> Pertains to all medicines<br><input type="checkbox"/> Pertains to specific medicines:<br>_____<br>_____<br><input type="checkbox"/> I don't know | <input type="checkbox"/> No<br><input type="checkbox"/> Yes:<br>_____<br>_____<br>_____ |
| <input type="checkbox"/> Taken at the wrong time <ul style="list-style-type: none"> <li><input type="checkbox"/> Too early</li> <li><input type="checkbox"/> Too late</li> <li><input type="checkbox"/> Other: _____</li> </ul>                      | <input type="checkbox"/> Pertains to all medicines<br><input type="checkbox"/> Pertains to specific medicines:<br>_____<br>_____<br><input type="checkbox"/> I don't know | <input type="checkbox"/> No<br><input type="checkbox"/> Yes:<br>_____<br>_____<br>_____ |
| <input type="checkbox"/> Administered the wrong way                                                                                                                                                                                                  | <input type="checkbox"/> Pertains to all medicines<br><input type="checkbox"/> Pertains to specific medicines:<br>_____<br>_____<br><input type="checkbox"/> I don't know | <input type="checkbox"/> No<br><input type="checkbox"/> Yes:<br>_____<br>_____<br>_____ |

Date of completion: \_\_\_\_ / \_\_\_\_ / \_\_\_\_

| What problem did you encounter?                                                                              | With which medication?                                                                                                                                                             | Did you take action?                                                                    |
|--------------------------------------------------------------------------------------------------------------|------------------------------------------------------------------------------------------------------------------------------------------------------------------------------------|-----------------------------------------------------------------------------------------|
| <input type="checkbox"/> Forgot to take the medication                                                       | <input type="checkbox"/> Pertains to all medicines<br><input type="checkbox"/> Pertains to specific medicines:<br>_____<br>_____<br>_____<br><input type="checkbox"/> I don't know | <input type="checkbox"/> No<br><input type="checkbox"/> Yes:<br>_____<br>_____<br>_____ |
| <input type="checkbox"/> Difficult administration (problems swallowing, inhaling, applying, injecting, etc.) | <input type="checkbox"/> Pertains to all medicines<br><input type="checkbox"/> Pertains to specific medicines:<br>_____<br>_____<br>_____<br><input type="checkbox"/> I don't know | <input type="checkbox"/> No<br><input type="checkbox"/> Yes:<br>_____<br>_____<br>_____ |
| <b>d. Problems with packaging</b>                                                                            |                                                                                                                                                                                    |                                                                                         |
| <input type="checkbox"/> Difficulty opening the packaging                                                    | <input type="checkbox"/> Pertains to all medicines<br><input type="checkbox"/> Pertains to specific medicines:<br>_____<br>_____<br>_____<br><input type="checkbox"/> I don't know | <input type="checkbox"/> No<br><input type="checkbox"/> Yes:<br>_____<br>_____<br>_____ |

| What problem did you encounter?                                                              | With which medication?                                                                                                                                                             | Did you take action?                                                                    |
|----------------------------------------------------------------------------------------------|------------------------------------------------------------------------------------------------------------------------------------------------------------------------------------|-----------------------------------------------------------------------------------------|
| <input type="checkbox"/> Storage issues (e.g. packaging was thrown away)                     | <input type="checkbox"/> Pertains to all medicines<br><input type="checkbox"/> Pertains to specific medicines:<br>_____<br>_____<br>_____<br><input type="checkbox"/> I don't know | <input type="checkbox"/> No<br><input type="checkbox"/> Yes:<br>_____<br>_____<br>_____ |
| <input type="checkbox"/> I cannot read or understand all the information about my medication | <input type="checkbox"/> Pertains to all medicines<br><input type="checkbox"/> Pertains to specific medicines:<br>_____<br>_____<br>_____<br><input type="checkbox"/> I don't know | <input type="checkbox"/> No<br><input type="checkbox"/> Yes:<br>_____<br>_____<br>_____ |
| e. Other problems                                                                            |                                                                                                                                                                                    |                                                                                         |
| _____<br>_____<br>_____<br>_____<br>_____                                                    | <input type="checkbox"/> Pertains to all medicines<br><input type="checkbox"/> Pertains to specific medicines:<br>_____<br>_____<br>_____<br><input type="checkbox"/> I don't know | <input type="checkbox"/> No<br><input type="checkbox"/> Yes:<br>_____<br>_____<br>_____ |

Date of completion: \_\_\_\_ / \_\_\_\_ / \_\_\_\_



Date: \_\_\_\_ / \_\_\_\_ / \_\_\_\_ or period from \_\_\_\_ / \_\_\_\_ / \_\_\_\_ to \_\_\_\_ / \_\_\_\_ / \_\_\_\_

| What problem did you encounter?                                                                                                                                                                                                                                                                                                                         | With which medication?                                                                                                                                                             | Did you take action?                                                                             |
|---------------------------------------------------------------------------------------------------------------------------------------------------------------------------------------------------------------------------------------------------------------------------------------------------------------------------------------------------------|------------------------------------------------------------------------------------------------------------------------------------------------------------------------------------|--------------------------------------------------------------------------------------------------|
| <b>a. Obtaining the medication</b>                                                                                                                                                                                                                                                                                                                      |                                                                                                                                                                                    |                                                                                                  |
| <input type="checkbox"/> Medication not in stock<br><input type="checkbox"/> Forgot to collect from the pharmacy<br><input type="checkbox"/> I am unable to go get my medication (restricted mobility, no help from others, etc.)<br><input type="checkbox"/> I cannot afford the medication<br><input type="checkbox"/> I had no prescription (refill) | <input type="checkbox"/> Pertains to all medicines<br><input type="checkbox"/> Pertains to specific medicines:<br>_____<br>_____<br>_____<br><input type="checkbox"/> I don't know | <input type="checkbox"/> No<br><input type="checkbox"/> Yes:<br>_____<br>_____<br>_____<br>_____ |
| <b>b. Side effects</b>                                                                                                                                                                                                                                                                                                                                  |                                                                                                                                                                                    |                                                                                                  |
|                                                                                                                                                                                                                                                                                                                                                         | <input type="checkbox"/> Pertains to all medicines<br><input type="checkbox"/> Pertains to specific medicines:<br>_____<br>_____<br>_____<br><input type="checkbox"/> I don't know | <input type="checkbox"/> No<br><input type="checkbox"/> Yes:<br>_____<br>_____<br>_____<br>_____ |

| What problem did you encounter?                                                                                                                                                                                                                      | With which medication?                                                                                                                                                    | Did you take action?                                                                    |
|------------------------------------------------------------------------------------------------------------------------------------------------------------------------------------------------------------------------------------------------------|---------------------------------------------------------------------------------------------------------------------------------------------------------------------------|-----------------------------------------------------------------------------------------|
| c. Problems with medication use                                                                                                                                                                                                                      |                                                                                                                                                                           |                                                                                         |
| <input type="checkbox"/> I took the wrong dose <ul style="list-style-type: none"> <li><input type="checkbox"/> More than prescribed</li> <li><input type="checkbox"/> Less than prescribed</li> <li><input type="checkbox"/> Other: _____</li> </ul> | <input type="checkbox"/> Pertains to all medicines<br><input type="checkbox"/> Pertains to specific medicines:<br>_____<br>_____<br><input type="checkbox"/> I don't know | <input type="checkbox"/> No<br><input type="checkbox"/> Yes:<br>_____<br>_____<br>_____ |
| <input type="checkbox"/> Taken at the wrong time <ul style="list-style-type: none"> <li><input type="checkbox"/> Too early</li> <li><input type="checkbox"/> Too late</li> <li><input type="checkbox"/> Other: _____</li> </ul>                      | <input type="checkbox"/> Pertains to all medicines<br><input type="checkbox"/> Pertains to specific medicines:<br>_____<br>_____<br><input type="checkbox"/> I don't know | <input type="checkbox"/> No<br><input type="checkbox"/> Yes:<br>_____<br>_____<br>_____ |
| <input type="checkbox"/> Administered the wrong way                                                                                                                                                                                                  | <input type="checkbox"/> Pertains to all medicines<br><input type="checkbox"/> Pertains to specific medicines:<br>_____<br>_____<br><input type="checkbox"/> I don't know | <input type="checkbox"/> No<br><input type="checkbox"/> Yes:<br>_____<br>_____<br>_____ |

Date of completion \_\_\_\_\_ / \_\_\_\_\_ / \_\_\_\_\_

| What problem did you encounter?                                                                              | With which medication?                                                                                                                                                             | Did you take action?                                                                    |
|--------------------------------------------------------------------------------------------------------------|------------------------------------------------------------------------------------------------------------------------------------------------------------------------------------|-----------------------------------------------------------------------------------------|
| <input type="checkbox"/> Forgot to take the medication                                                       | <input type="checkbox"/> Pertains to all medicines<br><input type="checkbox"/> Pertains to specific medicines:<br>_____<br>_____<br>_____<br><input type="checkbox"/> I don't know | <input type="checkbox"/> No<br><input type="checkbox"/> Yes:<br>_____<br>_____<br>_____ |
| <input type="checkbox"/> Difficult administration (problems swallowing, inhaling, applying, injecting, etc.) | <input type="checkbox"/> Pertains to all medicines<br><input type="checkbox"/> Pertains to specific medicines:<br>_____<br>_____<br>_____<br><input type="checkbox"/> I don't know | <input type="checkbox"/> No<br><input type="checkbox"/> Yes:<br>_____<br>_____<br>_____ |
| <b>d. Problems with packaging</b>                                                                            |                                                                                                                                                                                    |                                                                                         |
| <input type="checkbox"/> Difficulty opening the packaging                                                    | <input type="checkbox"/> Pertains to all medicines<br><input type="checkbox"/> Pertains to specific medicines:<br>_____<br>_____<br>_____<br><input type="checkbox"/> I don't know | <input type="checkbox"/> No<br><input type="checkbox"/> Yes:<br>_____<br>_____<br>_____ |

Date of completion: \_\_\_\_ / \_\_\_\_ / \_\_\_\_

| What problem did you encounter?                                                              | With which medication?                                                                                                                                                             | Did you take action?                                                                    |
|----------------------------------------------------------------------------------------------|------------------------------------------------------------------------------------------------------------------------------------------------------------------------------------|-----------------------------------------------------------------------------------------|
| <input type="checkbox"/> Storage issues (e.g. packaging was thrown away)                     | <input type="checkbox"/> Pertains to all medicines<br><input type="checkbox"/> Pertains to specific medicines:<br>_____<br>_____<br>_____<br><input type="checkbox"/> I don't know | <input type="checkbox"/> No<br><input type="checkbox"/> Yes:<br>_____<br>_____<br>_____ |
| <input type="checkbox"/> I cannot read or understand all the information about my medication | <input type="checkbox"/> Pertains to all medicines<br><input type="checkbox"/> Pertains to specific medicines:<br>_____<br>_____<br>_____<br><input type="checkbox"/> I don't know | <input type="checkbox"/> No<br><input type="checkbox"/> Yes:<br>_____<br>_____<br>_____ |
| <b>e. Other problems</b>                                                                     |                                                                                                                                                                                    |                                                                                         |
| _____<br>_____<br>_____<br>_____<br>_____                                                    | <input type="checkbox"/> Pertains to all medicines<br><input type="checkbox"/> Pertains to specific medicines:<br>_____<br>_____<br>_____<br><input type="checkbox"/> I don't know | <input type="checkbox"/> No<br><input type="checkbox"/> Yes:<br>_____<br>_____<br>_____ |

Date: \_\_\_\_ / \_\_\_\_ / \_\_\_\_ or period from \_\_\_\_ / \_\_\_\_ / \_\_\_\_ to \_\_\_\_ / \_\_\_\_ / \_\_\_\_

| What problem did you encounter?                                                                                                                                                                                                                                                                                                                         | With which medication?                                                                                                                                                             | Did you take action?                                                                             |
|---------------------------------------------------------------------------------------------------------------------------------------------------------------------------------------------------------------------------------------------------------------------------------------------------------------------------------------------------------|------------------------------------------------------------------------------------------------------------------------------------------------------------------------------------|--------------------------------------------------------------------------------------------------|
| <b>a. Obtaining the medication</b>                                                                                                                                                                                                                                                                                                                      |                                                                                                                                                                                    |                                                                                                  |
| <input type="checkbox"/> Medication not in stock<br><input type="checkbox"/> Forgot to collect from the pharmacy<br><input type="checkbox"/> I am unable to go get my medication (restricted mobility, no help from others, etc.)<br><input type="checkbox"/> I cannot afford the medication<br><input type="checkbox"/> I had no prescription (refill) | <input type="checkbox"/> Pertains to all medicines<br><input type="checkbox"/> Pertains to specific medicines:<br>_____<br>_____<br>_____<br><input type="checkbox"/> I don't know | <input type="checkbox"/> No<br><input type="checkbox"/> Yes:<br>_____<br>_____<br>_____<br>_____ |
| <b>b. Side effects</b>                                                                                                                                                                                                                                                                                                                                  |                                                                                                                                                                                    |                                                                                                  |
|                                                                                                                                                                                                                                                                                                                                                         | <input type="checkbox"/> Pertains to all medicines<br><input type="checkbox"/> Pertains to specific medicines:<br>_____<br>_____<br>_____<br><input type="checkbox"/> I don't know | <input type="checkbox"/> No<br><input type="checkbox"/> Yes:<br>_____<br>_____<br>_____<br>_____ |

| What problem did you encounter?                                                                                                                                                                                                                      | With which medication?                                                                                                                                                    | Did you take action?                                                                    |
|------------------------------------------------------------------------------------------------------------------------------------------------------------------------------------------------------------------------------------------------------|---------------------------------------------------------------------------------------------------------------------------------------------------------------------------|-----------------------------------------------------------------------------------------|
| <b>c. Problems with medication use</b>                                                                                                                                                                                                               |                                                                                                                                                                           |                                                                                         |
| <input type="checkbox"/> I took the wrong dose <ul style="list-style-type: none"> <li><input type="checkbox"/> More than prescribed</li> <li><input type="checkbox"/> Less than prescribed</li> <li><input type="checkbox"/> Other: _____</li> </ul> | <input type="checkbox"/> Pertains to all medicines<br><input type="checkbox"/> Pertains to specific medicines:<br>_____<br>_____<br><input type="checkbox"/> I don't know | <input type="checkbox"/> No<br><input type="checkbox"/> Yes:<br>_____<br>_____<br>_____ |
| <input type="checkbox"/> Taken at the wrong time <ul style="list-style-type: none"> <li><input type="checkbox"/> Too early</li> <li><input type="checkbox"/> Too late</li> <li><input type="checkbox"/> Other: _____</li> </ul>                      | <input type="checkbox"/> Pertains to all medicines<br><input type="checkbox"/> Pertains to specific medicines:<br>_____<br>_____<br><input type="checkbox"/> I don't know | <input type="checkbox"/> No<br><input type="checkbox"/> Yes:<br>_____<br>_____<br>_____ |
| <input type="checkbox"/> Administered the wrong way                                                                                                                                                                                                  | <input type="checkbox"/> Pertains to all medicines<br><input type="checkbox"/> Pertains to specific medicines:<br>_____<br>_____<br><input type="checkbox"/> I don't know | <input type="checkbox"/> No<br><input type="checkbox"/> Yes:<br>_____<br>_____<br>_____ |

Date of completion: \_\_\_\_/\_\_\_\_/\_\_\_\_

| What problem did you encounter?                                                                              | With which medication?                                                                                                                                                             | Did you take action?                                                                    |
|--------------------------------------------------------------------------------------------------------------|------------------------------------------------------------------------------------------------------------------------------------------------------------------------------------|-----------------------------------------------------------------------------------------|
| <input type="checkbox"/> Forgot to take the medication                                                       | <input type="checkbox"/> Pertains to all medicines<br><input type="checkbox"/> Pertains to specific medicines:<br>_____<br>_____<br>_____<br><input type="checkbox"/> I don't know | <input type="checkbox"/> No<br><input type="checkbox"/> Yes:<br>_____<br>_____<br>_____ |
| <input type="checkbox"/> Difficult administration (problems swallowing, inhaling, applying, injecting, etc.) | <input type="checkbox"/> Pertains to all medicines<br><input type="checkbox"/> Pertains to specific medicines:<br>_____<br>_____<br>_____<br><input type="checkbox"/> I don't know | <input type="checkbox"/> No<br><input type="checkbox"/> Yes:<br>_____<br>_____<br>_____ |
| <b>d. Problems with packaging</b>                                                                            |                                                                                                                                                                                    |                                                                                         |
| <input type="checkbox"/> Difficulty opening the packaging                                                    | <input type="checkbox"/> Pertains to all medicines<br><input type="checkbox"/> Pertains to specific medicines:<br>_____<br>_____<br>_____<br><input type="checkbox"/> I don't know | <input type="checkbox"/> No<br><input type="checkbox"/> Yes:<br>_____<br>_____<br>_____ |

| What problem did you encounter?                                                              | With which medication?                                                                                                                                                             | Did you take action?                                                                    |
|----------------------------------------------------------------------------------------------|------------------------------------------------------------------------------------------------------------------------------------------------------------------------------------|-----------------------------------------------------------------------------------------|
| <input type="checkbox"/> Storage issues (e.g. packaging was thrown away)                     | <input type="checkbox"/> Pertains to all medicines<br><input type="checkbox"/> Pertains to specific medicines:<br>_____<br>_____<br>_____<br><input type="checkbox"/> I don't know | <input type="checkbox"/> No<br><input type="checkbox"/> Yes:<br>_____<br>_____<br>_____ |
| <input type="checkbox"/> I cannot read or understand all the information about my medication | <input type="checkbox"/> Pertains to all medicines<br><input type="checkbox"/> Pertains to specific medicines:<br>_____<br>_____<br>_____<br><input type="checkbox"/> I don't know | <input type="checkbox"/> No<br><input type="checkbox"/> Yes:<br>_____<br>_____<br>_____ |
| e. Other problems                                                                            |                                                                                                                                                                                    |                                                                                         |
| _____<br>_____<br>_____<br>_____<br>_____                                                    | <input type="checkbox"/> Pertains to all medicines<br><input type="checkbox"/> Pertains to specific medicines:<br>_____<br>_____<br>_____<br><input type="checkbox"/> I don't know | <input type="checkbox"/> No<br><input type="checkbox"/> Yes:<br>_____<br>_____<br>_____ |

Date of completion: \_\_\_\_ / \_\_\_\_ / \_\_\_\_



Date: \_\_\_\_ / \_\_\_\_ / \_\_\_\_ or period from \_\_\_\_ / \_\_\_\_ / \_\_\_\_ to \_\_\_\_ / \_\_\_\_ / \_\_\_\_

| What problem did you encounter?                                                                                                                                                                                                                                                                                                                         | With which medication?                                                                                                                                                             | Did you take action?                                                                             |
|---------------------------------------------------------------------------------------------------------------------------------------------------------------------------------------------------------------------------------------------------------------------------------------------------------------------------------------------------------|------------------------------------------------------------------------------------------------------------------------------------------------------------------------------------|--------------------------------------------------------------------------------------------------|
| <b>a. Obtaining the medication</b>                                                                                                                                                                                                                                                                                                                      |                                                                                                                                                                                    |                                                                                                  |
| <input type="checkbox"/> Medication not in stock<br><input type="checkbox"/> Forgot to collect from the pharmacy<br><input type="checkbox"/> I am unable to go get my medication (restricted mobility, no help from others, etc.)<br><input type="checkbox"/> I cannot afford the medication<br><input type="checkbox"/> I had no prescription (refill) | <input type="checkbox"/> Pertains to all medicines<br><input type="checkbox"/> Pertains to specific medicines:<br>_____<br>_____<br>_____<br><input type="checkbox"/> I don't know | <input type="checkbox"/> No<br><input type="checkbox"/> Yes:<br>_____<br>_____<br>_____<br>_____ |
| <b>b. Side effects</b>                                                                                                                                                                                                                                                                                                                                  |                                                                                                                                                                                    |                                                                                                  |
|                                                                                                                                                                                                                                                                                                                                                         | <input type="checkbox"/> Pertains to all medicines<br><input type="checkbox"/> Pertains to specific medicines:<br>_____<br>_____<br>_____<br><input type="checkbox"/> I don't know | <input type="checkbox"/> No<br><input type="checkbox"/> Yes:<br>_____<br>_____<br>_____<br>_____ |

| What problem did you encounter?                                                                                                                                                                                                                      | With which medication?                                                                                                                                                    | Did you take action?                                                                    |
|------------------------------------------------------------------------------------------------------------------------------------------------------------------------------------------------------------------------------------------------------|---------------------------------------------------------------------------------------------------------------------------------------------------------------------------|-----------------------------------------------------------------------------------------|
| c. Problems with medication use                                                                                                                                                                                                                      |                                                                                                                                                                           |                                                                                         |
| <input type="checkbox"/> I took the wrong dose <ul style="list-style-type: none"> <li><input type="checkbox"/> More than prescribed</li> <li><input type="checkbox"/> Less than prescribed</li> <li><input type="checkbox"/> Other: _____</li> </ul> | <input type="checkbox"/> Pertains to all medicines<br><input type="checkbox"/> Pertains to specific medicines:<br>_____<br>_____<br><input type="checkbox"/> I don't know | <input type="checkbox"/> No<br><input type="checkbox"/> Yes:<br>_____<br>_____<br>_____ |
| <input type="checkbox"/> Taken at the wrong time <ul style="list-style-type: none"> <li><input type="checkbox"/> Too early</li> <li><input type="checkbox"/> Too late</li> <li><input type="checkbox"/> Other: _____</li> </ul>                      | <input type="checkbox"/> Pertains to all medicines<br><input type="checkbox"/> Pertains to specific medicines:<br>_____<br>_____<br><input type="checkbox"/> I don't know | <input type="checkbox"/> No<br><input type="checkbox"/> Yes:<br>_____<br>_____<br>_____ |
| <input type="checkbox"/> Administered the wrong way                                                                                                                                                                                                  | <input type="checkbox"/> Pertains to all medicines<br><input type="checkbox"/> Pertains to specific medicines:<br>_____<br>_____<br><input type="checkbox"/> I don't know | <input type="checkbox"/> No<br><input type="checkbox"/> Yes:<br>_____<br>_____<br>_____ |

Date of completion: \_\_\_\_/\_\_\_\_/\_\_\_\_

| What problem did you encounter?                                                                              | With which medication?                                                                                                                                                             | Did you take action?                                                                    |
|--------------------------------------------------------------------------------------------------------------|------------------------------------------------------------------------------------------------------------------------------------------------------------------------------------|-----------------------------------------------------------------------------------------|
| <input type="checkbox"/> Forgot to take the medication                                                       | <input type="checkbox"/> Pertains to all medicines<br><input type="checkbox"/> Pertains to specific medicines:<br>_____<br>_____<br>_____<br><input type="checkbox"/> I don't know | <input type="checkbox"/> No<br><input type="checkbox"/> Yes:<br>_____<br>_____<br>_____ |
| <input type="checkbox"/> Difficult administration (problems swallowing, inhaling, applying, injecting, etc.) | <input type="checkbox"/> Pertains to all medicines<br><input type="checkbox"/> Pertains to specific medicines:<br>_____<br>_____<br>_____<br><input type="checkbox"/> I don't know | <input type="checkbox"/> No<br><input type="checkbox"/> Yes:<br>_____<br>_____<br>_____ |
| <b>d. Problems with packaging</b>                                                                            |                                                                                                                                                                                    |                                                                                         |
| <input type="checkbox"/> Difficulty opening the packaging                                                    | <input type="checkbox"/> Pertains to all medicines<br><input type="checkbox"/> Pertains to specific medicines:<br>_____<br>_____<br>_____<br><input type="checkbox"/> I don't know | <input type="checkbox"/> No<br><input type="checkbox"/> Yes:<br>_____<br>_____<br>_____ |

| What problem did you encounter?                                                              | With which medication?                                                                                                                                                             | Did you take action?                                                                    |
|----------------------------------------------------------------------------------------------|------------------------------------------------------------------------------------------------------------------------------------------------------------------------------------|-----------------------------------------------------------------------------------------|
| <input type="checkbox"/> Storage issues (e.g. packaging was thrown away)                     | <input type="checkbox"/> Pertains to all medicines<br><input type="checkbox"/> Pertains to specific medicines:<br>_____<br>_____<br>_____<br><input type="checkbox"/> I don't know | <input type="checkbox"/> No<br><input type="checkbox"/> Yes:<br>_____<br>_____<br>_____ |
| <input type="checkbox"/> I cannot read or understand all the information about my medication | <input type="checkbox"/> Pertains to all medicines<br><input type="checkbox"/> Pertains to specific medicines:<br>_____<br>_____<br>_____<br><input type="checkbox"/> I don't know | <input type="checkbox"/> No<br><input type="checkbox"/> Yes:<br>_____<br>_____<br>_____ |
| <b>e. Other problems</b>                                                                     |                                                                                                                                                                                    |                                                                                         |
| _____<br>_____<br>_____<br>_____<br>_____                                                    | <input type="checkbox"/> Pertains to all medicines<br><input type="checkbox"/> Pertains to specific medicines:<br>_____<br>_____<br>_____<br><input type="checkbox"/> I don't know | <input type="checkbox"/> No<br><input type="checkbox"/> Yes:<br>_____<br>_____<br>_____ |

Date of completion: \_\_\_\_ / \_\_\_\_ / \_\_\_\_

Date: \_\_\_\_ / \_\_\_\_ / \_\_\_\_ or period from \_\_\_\_ / \_\_\_\_ / \_\_\_\_ to \_\_\_\_ / \_\_\_\_ / \_\_\_\_

| What problem did you encounter?                                                                                                                                                                                                                                                                                                                         | With which medication?                                                                                                                                                             | Did you take action?                                                                             |
|---------------------------------------------------------------------------------------------------------------------------------------------------------------------------------------------------------------------------------------------------------------------------------------------------------------------------------------------------------|------------------------------------------------------------------------------------------------------------------------------------------------------------------------------------|--------------------------------------------------------------------------------------------------|
| <b>a. Obtaining the medication</b>                                                                                                                                                                                                                                                                                                                      |                                                                                                                                                                                    |                                                                                                  |
| <input type="checkbox"/> Medication not in stock<br><input type="checkbox"/> Forgot to collect from the pharmacy<br><input type="checkbox"/> I am unable to go get my medication (restricted mobility, no help from others, etc.)<br><input type="checkbox"/> I cannot afford the medication<br><input type="checkbox"/> I had no prescription (refill) | <input type="checkbox"/> Pertains to all medicines<br><input type="checkbox"/> Pertains to specific medicines:<br>_____<br>_____<br>_____<br><input type="checkbox"/> I don't know | <input type="checkbox"/> No<br><input type="checkbox"/> Yes:<br>_____<br>_____<br>_____<br>_____ |
| <b>b. Side effects</b>                                                                                                                                                                                                                                                                                                                                  |                                                                                                                                                                                    |                                                                                                  |
|                                                                                                                                                                                                                                                                                                                                                         | <input type="checkbox"/> Pertains to all medicines<br><input type="checkbox"/> Pertains to specific medicines:<br>_____<br>_____<br>_____<br><input type="checkbox"/> I don't know | <input type="checkbox"/> No<br><input type="checkbox"/> Yes:<br>_____<br>_____<br>_____<br>_____ |

| What problem did you encounter?                                                                                                                                                                             | With which medication?                                                                                                                                                             | Did you take action?                                                                    |
|-------------------------------------------------------------------------------------------------------------------------------------------------------------------------------------------------------------|------------------------------------------------------------------------------------------------------------------------------------------------------------------------------------|-----------------------------------------------------------------------------------------|
| c. Problems with medication use                                                                                                                                                                             |                                                                                                                                                                                    |                                                                                         |
| <input type="checkbox"/> I took the wrong dose<br><input type="checkbox"/> More than prescribed<br><input type="checkbox"/> Less than prescribed<br><input type="checkbox"/> Other: _____<br>_____<br>_____ | <input type="checkbox"/> Pertains to all medicines<br><input type="checkbox"/> Pertains to specific medicines:<br>_____<br>_____<br>_____<br><input type="checkbox"/> I don't know | <input type="checkbox"/> No<br><input type="checkbox"/> Yes:<br>_____<br>_____<br>_____ |
| <input type="checkbox"/> Taken at the wrong time<br><input type="checkbox"/> Too early<br><input type="checkbox"/> Too late<br><input type="checkbox"/> Other: _____<br>_____<br>_____                      | <input type="checkbox"/> Pertains to all medicines<br><input type="checkbox"/> Pertains to specific medicines:<br>_____<br>_____<br>_____<br><input type="checkbox"/> I don't know | <input type="checkbox"/> No<br><input type="checkbox"/> Yes:<br>_____<br>_____<br>_____ |
| <input type="checkbox"/> Administered the wrong way                                                                                                                                                         | <input type="checkbox"/> Pertains to all medicines<br><input type="checkbox"/> Pertains to specific medicines:<br>_____<br>_____<br>_____<br><input type="checkbox"/> I don't know | <input type="checkbox"/> No<br><input type="checkbox"/> Yes:<br>_____<br>_____<br>_____ |

Date of completion: \_\_\_\_/\_\_\_\_/\_\_\_\_

| What problem did you encounter?                                                                              | With which medication?                                                                                                                                                             | Did you take action?                                                                    |
|--------------------------------------------------------------------------------------------------------------|------------------------------------------------------------------------------------------------------------------------------------------------------------------------------------|-----------------------------------------------------------------------------------------|
| <input type="checkbox"/> Forgot to take the medication                                                       | <input type="checkbox"/> Pertains to all medicines<br><input type="checkbox"/> Pertains to specific medicines:<br>_____<br>_____<br>_____<br><input type="checkbox"/> I don't know | <input type="checkbox"/> No<br><input type="checkbox"/> Yes:<br>_____<br>_____<br>_____ |
| <input type="checkbox"/> Difficult administration (problems swallowing, inhaling, applying, injecting, etc.) | <input type="checkbox"/> Pertains to all medicines<br><input type="checkbox"/> Pertains to specific medicines:<br>_____<br>_____<br>_____<br><input type="checkbox"/> I don't know | <input type="checkbox"/> No<br><input type="checkbox"/> Yes:<br>_____<br>_____<br>_____ |
| <b>d. Problems with packaging</b>                                                                            |                                                                                                                                                                                    |                                                                                         |
| <input type="checkbox"/> Difficulty opening the packaging                                                    | <input type="checkbox"/> Pertains to all medicines<br><input type="checkbox"/> Pertains to specific medicines:<br>_____<br>_____<br>_____<br><input type="checkbox"/> I don't know | <input type="checkbox"/> No<br><input type="checkbox"/> Yes:<br>_____<br>_____<br>_____ |

| What problem did you encounter?                                                              | With which medication?                                                                                                                                                             | Did you take action?                                                                    |
|----------------------------------------------------------------------------------------------|------------------------------------------------------------------------------------------------------------------------------------------------------------------------------------|-----------------------------------------------------------------------------------------|
| <input type="checkbox"/> Storage issues (e.g. packaging was thrown away)                     | <input type="checkbox"/> Pertains to all medicines<br><input type="checkbox"/> Pertains to specific medicines:<br>_____<br>_____<br>_____<br><input type="checkbox"/> I don't know | <input type="checkbox"/> No<br><input type="checkbox"/> Yes:<br>_____<br>_____<br>_____ |
| <input type="checkbox"/> I cannot read or understand all the information about my medication | <input type="checkbox"/> Pertains to all medicines<br><input type="checkbox"/> Pertains to specific medicines:<br>_____<br>_____<br>_____<br><input type="checkbox"/> I don't know | <input type="checkbox"/> No<br><input type="checkbox"/> Yes:<br>_____<br>_____<br>_____ |
| e. Other problems                                                                            |                                                                                                                                                                                    |                                                                                         |
| _____<br>_____<br>_____<br>_____<br>_____                                                    | <input type="checkbox"/> Pertains to all medicines<br><input type="checkbox"/> Pertains to specific medicines:<br>_____<br>_____<br>_____<br><input type="checkbox"/> I don't know | <input type="checkbox"/> No<br><input type="checkbox"/> Yes:<br>_____<br>_____<br>_____ |

Date of completion: \_\_\_\_ / \_\_\_\_ / \_\_\_\_



Date: \_\_\_\_ / \_\_\_\_ / \_\_\_\_ or period from \_\_\_\_ / \_\_\_\_ / \_\_\_\_ to \_\_\_\_ / \_\_\_\_ / \_\_\_\_

| What problem did you encounter?                                                                                                                                                                                                                                                                                                                         | With which medication?                                                                                                                                                             | Did you take action?                                                                             |
|---------------------------------------------------------------------------------------------------------------------------------------------------------------------------------------------------------------------------------------------------------------------------------------------------------------------------------------------------------|------------------------------------------------------------------------------------------------------------------------------------------------------------------------------------|--------------------------------------------------------------------------------------------------|
| <b>a. Obtaining the medication</b>                                                                                                                                                                                                                                                                                                                      |                                                                                                                                                                                    |                                                                                                  |
| <input type="checkbox"/> Medication not in stock<br><input type="checkbox"/> Forgot to collect from the pharmacy<br><input type="checkbox"/> I am unable to go get my medication (restricted mobility, no help from others, etc.)<br><input type="checkbox"/> I cannot afford the medication<br><input type="checkbox"/> I had no prescription (refill) | <input type="checkbox"/> Pertains to all medicines<br><input type="checkbox"/> Pertains to specific medicines:<br>_____<br>_____<br>_____<br><input type="checkbox"/> I don't know | <input type="checkbox"/> No<br><input type="checkbox"/> Yes:<br>_____<br>_____<br>_____<br>_____ |
| <b>b. Side effects</b>                                                                                                                                                                                                                                                                                                                                  |                                                                                                                                                                                    |                                                                                                  |
|                                                                                                                                                                                                                                                                                                                                                         | <input type="checkbox"/> Pertains to all medicines<br><input type="checkbox"/> Pertains to specific medicines:<br>_____<br>_____<br>_____<br><input type="checkbox"/> I don't know | <input type="checkbox"/> No<br><input type="checkbox"/> Yes:<br>_____<br>_____<br>_____<br>_____ |

| What problem did you encounter?                                                                                                                                                                                                                      | With which medication?                                                                                                                                                    | Did you take action?                                                                    |
|------------------------------------------------------------------------------------------------------------------------------------------------------------------------------------------------------------------------------------------------------|---------------------------------------------------------------------------------------------------------------------------------------------------------------------------|-----------------------------------------------------------------------------------------|
| c. Problems with medication use                                                                                                                                                                                                                      |                                                                                                                                                                           |                                                                                         |
| <input type="checkbox"/> I took the wrong dose <ul style="list-style-type: none"> <li><input type="checkbox"/> More than prescribed</li> <li><input type="checkbox"/> Less than prescribed</li> <li><input type="checkbox"/> Other: _____</li> </ul> | <input type="checkbox"/> Pertains to all medicines<br><input type="checkbox"/> Pertains to specific medicines:<br>_____<br>_____<br><input type="checkbox"/> I don't know | <input type="checkbox"/> No<br><input type="checkbox"/> Yes:<br>_____<br>_____<br>_____ |
| <input type="checkbox"/> Taken at the wrong time <ul style="list-style-type: none"> <li><input type="checkbox"/> Too early</li> <li><input type="checkbox"/> Too late</li> <li><input type="checkbox"/> Other: _____</li> </ul>                      | <input type="checkbox"/> Pertains to all medicines<br><input type="checkbox"/> Pertains to specific medicines:<br>_____<br>_____<br><input type="checkbox"/> I don't know | <input type="checkbox"/> No<br><input type="checkbox"/> Yes:<br>_____<br>_____<br>_____ |
| <input type="checkbox"/> Administered the wrong way                                                                                                                                                                                                  | <input type="checkbox"/> Pertains to all medicines<br><input type="checkbox"/> Pertains to specific medicines:<br>_____<br>_____<br><input type="checkbox"/> I don't know | <input type="checkbox"/> No<br><input type="checkbox"/> Yes:<br>_____<br>_____<br>_____ |

Date of completion: \_\_\_\_/\_\_\_\_/\_\_\_\_

| What problem did you encounter?                                                                              | With which medication?                                                                                                                                                             | Did you take action?                                                                    |
|--------------------------------------------------------------------------------------------------------------|------------------------------------------------------------------------------------------------------------------------------------------------------------------------------------|-----------------------------------------------------------------------------------------|
| <input type="checkbox"/> Forgot to take the medication                                                       | <input type="checkbox"/> Pertains to all medicines<br><input type="checkbox"/> Pertains to specific medicines:<br>_____<br>_____<br>_____<br><input type="checkbox"/> I don't know | <input type="checkbox"/> No<br><input type="checkbox"/> Yes:<br>_____<br>_____<br>_____ |
| <input type="checkbox"/> Difficult administration (problems swallowing, inhaling, applying, injecting, etc.) | <input type="checkbox"/> Pertains to all medicines<br><input type="checkbox"/> Pertains to specific medicines:<br>_____<br>_____<br>_____<br><input type="checkbox"/> I don't know | <input type="checkbox"/> No<br><input type="checkbox"/> Yes:<br>_____<br>_____<br>_____ |
| <b>d. Problems with packaging</b>                                                                            |                                                                                                                                                                                    |                                                                                         |
| <input type="checkbox"/> Difficulty opening the packaging                                                    | <input type="checkbox"/> Pertains to all medicines<br><input type="checkbox"/> Pertains to specific medicines:<br>_____<br>_____<br>_____<br><input type="checkbox"/> I don't know | <input type="checkbox"/> No<br><input type="checkbox"/> Yes:<br>_____<br>_____<br>_____ |

| What problem did you encounter?                                                              | With which medication?                                                                                                                                                             | Did you take action?                                                                    |
|----------------------------------------------------------------------------------------------|------------------------------------------------------------------------------------------------------------------------------------------------------------------------------------|-----------------------------------------------------------------------------------------|
| <input type="checkbox"/> Storage issues (e.g. packaging was thrown away)                     | <input type="checkbox"/> Pertains to all medicines<br><input type="checkbox"/> Pertains to specific medicines:<br>_____<br>_____<br>_____<br><input type="checkbox"/> I don't know | <input type="checkbox"/> No<br><input type="checkbox"/> Yes:<br>_____<br>_____<br>_____ |
| <input type="checkbox"/> I cannot read or understand all the information about my medication | <input type="checkbox"/> Pertains to all medicines<br><input type="checkbox"/> Pertains to specific medicines:<br>_____<br>_____<br>_____<br><input type="checkbox"/> I don't know | <input type="checkbox"/> No<br><input type="checkbox"/> Yes:<br>_____<br>_____<br>_____ |
| <b>e. Other problems</b>                                                                     |                                                                                                                                                                                    |                                                                                         |
| _____<br>_____<br>_____<br>_____<br>_____                                                    | <input type="checkbox"/> Pertains to all medicines<br><input type="checkbox"/> Pertains to specific medicines:<br>_____<br>_____<br>_____<br><input type="checkbox"/> I don't know | <input type="checkbox"/> No<br><input type="checkbox"/> Yes:<br>_____<br>_____<br>_____ |

Date of completion: \_\_\_\_ / \_\_\_\_ / \_\_\_\_

Date: \_\_\_\_ / \_\_\_\_ / \_\_\_\_ or period from \_\_\_\_ / \_\_\_\_ / \_\_\_\_ to \_\_\_\_ / \_\_\_\_ / \_\_\_\_

| What problem did you encounter?                                                                                                                                                                                                                                                                                                                         | With which medication?                                                                                                                                                             | Did you take action?                                                                             |
|---------------------------------------------------------------------------------------------------------------------------------------------------------------------------------------------------------------------------------------------------------------------------------------------------------------------------------------------------------|------------------------------------------------------------------------------------------------------------------------------------------------------------------------------------|--------------------------------------------------------------------------------------------------|
| <b>a. Obtaining the medication</b>                                                                                                                                                                                                                                                                                                                      |                                                                                                                                                                                    |                                                                                                  |
| <input type="checkbox"/> Medication not in stock<br><input type="checkbox"/> Forgot to collect from the pharmacy<br><input type="checkbox"/> I am unable to go get my medication (restricted mobility, no help from others, etc.)<br><input type="checkbox"/> I cannot afford the medication<br><input type="checkbox"/> I had no prescription (refill) | <input type="checkbox"/> Pertains to all medicines<br><input type="checkbox"/> Pertains to specific medicines:<br>_____<br>_____<br>_____<br><input type="checkbox"/> I don't know | <input type="checkbox"/> No<br><input type="checkbox"/> Yes:<br>_____<br>_____<br>_____<br>_____ |
| <b>b. Side effects</b>                                                                                                                                                                                                                                                                                                                                  |                                                                                                                                                                                    |                                                                                                  |
|                                                                                                                                                                                                                                                                                                                                                         | <input type="checkbox"/> Pertains to all medicines<br><input type="checkbox"/> Pertains to specific medicines:<br>_____<br>_____<br>_____<br><input type="checkbox"/> I don't know | <input type="checkbox"/> No<br><input type="checkbox"/> Yes:<br>_____<br>_____<br>_____<br>_____ |

| What problem did you encounter?                                                                                                                                                                             | With which medication?                                                                                                                                                             | Did you take action?                                                                    |
|-------------------------------------------------------------------------------------------------------------------------------------------------------------------------------------------------------------|------------------------------------------------------------------------------------------------------------------------------------------------------------------------------------|-----------------------------------------------------------------------------------------|
| c. Problems with medication use                                                                                                                                                                             |                                                                                                                                                                                    |                                                                                         |
| <input type="checkbox"/> I took the wrong dose<br><input type="checkbox"/> More than prescribed<br><input type="checkbox"/> Less than prescribed<br><input type="checkbox"/> Other: _____<br>_____<br>_____ | <input type="checkbox"/> Pertains to all medicines<br><input type="checkbox"/> Pertains to specific medicines:<br>_____<br>_____<br>_____<br><input type="checkbox"/> I don't know | <input type="checkbox"/> No<br><input type="checkbox"/> Yes:<br>_____<br>_____<br>_____ |
| <input type="checkbox"/> Taken at the wrong time<br><input type="checkbox"/> Too early<br><input type="checkbox"/> Too late<br><input type="checkbox"/> Other: _____<br>_____<br>_____                      | <input type="checkbox"/> Pertains to all medicines<br><input type="checkbox"/> Pertains to specific medicines:<br>_____<br>_____<br>_____<br><input type="checkbox"/> I don't know | <input type="checkbox"/> No<br><input type="checkbox"/> Yes:<br>_____<br>_____<br>_____ |
| <input type="checkbox"/> Administered the wrong way                                                                                                                                                         | <input type="checkbox"/> Pertains to all medicines<br><input type="checkbox"/> Pertains to specific medicines:<br>_____<br>_____<br>_____<br><input type="checkbox"/> I don't know | <input type="checkbox"/> No<br><input type="checkbox"/> Yes:<br>_____<br>_____<br>_____ |

Date of completion: \_\_\_\_ / \_\_\_\_ / \_\_\_\_

| What problem did you encounter?                                                                              | With which medication?                                                                                                                                                             | Did you take action?                                                                    |
|--------------------------------------------------------------------------------------------------------------|------------------------------------------------------------------------------------------------------------------------------------------------------------------------------------|-----------------------------------------------------------------------------------------|
| <input type="checkbox"/> Forgot to take the medication                                                       | <input type="checkbox"/> Pertains to all medicines<br><input type="checkbox"/> Pertains to specific medicines:<br>_____<br>_____<br>_____<br><input type="checkbox"/> I don't know | <input type="checkbox"/> No<br><input type="checkbox"/> Yes:<br>_____<br>_____<br>_____ |
| <input type="checkbox"/> Difficult administration (problems swallowing, inhaling, applying, injecting, etc.) | <input type="checkbox"/> Pertains to all medicines<br><input type="checkbox"/> Pertains to specific medicines:<br>_____<br>_____<br>_____<br><input type="checkbox"/> I don't know | <input type="checkbox"/> No<br><input type="checkbox"/> Yes:<br>_____<br>_____<br>_____ |
| <b>d. Problems with packaging</b>                                                                            |                                                                                                                                                                                    |                                                                                         |
| <input type="checkbox"/> Difficulty opening the packaging                                                    | <input type="checkbox"/> Pertains to all medicines<br><input type="checkbox"/> Pertains to specific medicines:<br>_____<br>_____<br>_____<br><input type="checkbox"/> I don't know | <input type="checkbox"/> No<br><input type="checkbox"/> Yes:<br>_____<br>_____<br>_____ |

Date of completion: \_\_\_\_ / \_\_\_\_ / \_\_\_\_

| What problem did you encounter?                                                              | With which medication?                                                                                                                                                             | Did you take action?                                                                    |
|----------------------------------------------------------------------------------------------|------------------------------------------------------------------------------------------------------------------------------------------------------------------------------------|-----------------------------------------------------------------------------------------|
| <input type="checkbox"/> Storage issues (e.g. packaging was thrown away)                     | <input type="checkbox"/> Pertains to all medicines<br><input type="checkbox"/> Pertains to specific medicines:<br>_____<br>_____<br>_____<br><input type="checkbox"/> I don't know | <input type="checkbox"/> No<br><input type="checkbox"/> Yes:<br>_____<br>_____<br>_____ |
| <input type="checkbox"/> I cannot read or understand all the information about my medication | <input type="checkbox"/> Pertains to all medicines<br><input type="checkbox"/> Pertains to specific medicines:<br>_____<br>_____<br>_____<br><input type="checkbox"/> I don't know | <input type="checkbox"/> No<br><input type="checkbox"/> Yes:<br>_____<br>_____<br>_____ |
| <b>e. Other problems</b>                                                                     |                                                                                                                                                                                    |                                                                                         |
| _____<br>_____<br>_____<br>_____<br>_____                                                    | <input type="checkbox"/> Pertains to all medicines<br><input type="checkbox"/> Pertains to specific medicines:<br>_____<br>_____<br>_____<br><input type="checkbox"/> I don't know | <input type="checkbox"/> No<br><input type="checkbox"/> Yes:<br>_____<br>_____<br>_____ |



Date: \_\_\_\_ / \_\_\_\_ / \_\_\_\_ or period from \_\_\_\_ / \_\_\_\_ / \_\_\_\_ to \_\_\_\_ / \_\_\_\_ / \_\_\_\_

| What problem did you encounter?                                                                                                                                                                                                                                                                                                                         | With which medication?                                                                                                                                                             | Did you take action?                                                                             |
|---------------------------------------------------------------------------------------------------------------------------------------------------------------------------------------------------------------------------------------------------------------------------------------------------------------------------------------------------------|------------------------------------------------------------------------------------------------------------------------------------------------------------------------------------|--------------------------------------------------------------------------------------------------|
| <b>a. Obtaining the medication</b>                                                                                                                                                                                                                                                                                                                      |                                                                                                                                                                                    |                                                                                                  |
| <input type="checkbox"/> Medication not in stock<br><input type="checkbox"/> Forgot to collect from the pharmacy<br><input type="checkbox"/> I am unable to go get my medication (restricted mobility, no help from others, etc.)<br><input type="checkbox"/> I cannot afford the medication<br><input type="checkbox"/> I had no prescription (refill) | <input type="checkbox"/> Pertains to all medicines<br><input type="checkbox"/> Pertains to specific medicines:<br>_____<br>_____<br>_____<br><input type="checkbox"/> I don't know | <input type="checkbox"/> No<br><input type="checkbox"/> Yes:<br>_____<br>_____<br>_____<br>_____ |
| <b>b. Side effects</b>                                                                                                                                                                                                                                                                                                                                  |                                                                                                                                                                                    |                                                                                                  |
|                                                                                                                                                                                                                                                                                                                                                         | <input type="checkbox"/> Pertains to all medicines<br><input type="checkbox"/> Pertains to specific medicines:<br>_____<br>_____<br>_____<br><input type="checkbox"/> I don't know | <input type="checkbox"/> No<br><input type="checkbox"/> Yes:<br>_____<br>_____<br>_____<br>_____ |

| What problem did you encounter?                                                                                                                                                                                                                      | With which medication?                                                                                                                                                    | Did you take action?                                                           |
|------------------------------------------------------------------------------------------------------------------------------------------------------------------------------------------------------------------------------------------------------|---------------------------------------------------------------------------------------------------------------------------------------------------------------------------|--------------------------------------------------------------------------------|
| c. Problems with medication use                                                                                                                                                                                                                      |                                                                                                                                                                           |                                                                                |
| <input type="checkbox"/> I took the wrong dose <ul style="list-style-type: none"> <li><input type="checkbox"/> More than prescribed</li> <li><input type="checkbox"/> Less than prescribed</li> <li><input type="checkbox"/> Other: _____</li> </ul> | <input type="checkbox"/> Pertains to all medicines<br><input type="checkbox"/> Pertains to specific medicines:<br>_____<br>_____<br><input type="checkbox"/> I don't know | <input type="checkbox"/> No<br><input type="checkbox"/> Yes:<br>_____<br>_____ |
| <input type="checkbox"/> Taken at the wrong time <ul style="list-style-type: none"> <li><input type="checkbox"/> Too early</li> <li><input type="checkbox"/> Too late</li> <li><input type="checkbox"/> Other: _____</li> </ul>                      | <input type="checkbox"/> Pertains to all medicines<br><input type="checkbox"/> Pertains to specific medicines:<br>_____<br>_____<br><input type="checkbox"/> I don't know | <input type="checkbox"/> No<br><input type="checkbox"/> Yes:<br>_____<br>_____ |
| <input type="checkbox"/> Administered the wrong way                                                                                                                                                                                                  | <input type="checkbox"/> Pertains to all medicines<br><input type="checkbox"/> Pertains to specific medicines:<br>_____<br>_____<br><input type="checkbox"/> I don't know | <input type="checkbox"/> No<br><input type="checkbox"/> Yes:<br>_____<br>_____ |

Date of completion: \_\_\_\_/\_\_\_\_/\_\_\_\_

| What problem did you encounter?                                                                              | With which medication?                                                                                                                                                             | Did you take action?                                                                    |
|--------------------------------------------------------------------------------------------------------------|------------------------------------------------------------------------------------------------------------------------------------------------------------------------------------|-----------------------------------------------------------------------------------------|
| <input type="checkbox"/> Forgot to take the medication                                                       | <input type="checkbox"/> Pertains to all medicines<br><input type="checkbox"/> Pertains to specific medicines:<br>_____<br>_____<br>_____<br><input type="checkbox"/> I don't know | <input type="checkbox"/> No<br><input type="checkbox"/> Yes:<br>_____<br>_____<br>_____ |
| <input type="checkbox"/> Difficult administration (problems swallowing, inhaling, applying, injecting, etc.) | <input type="checkbox"/> Pertains to all medicines<br><input type="checkbox"/> Pertains to specific medicines:<br>_____<br>_____<br>_____<br><input type="checkbox"/> I don't know | <input type="checkbox"/> No<br><input type="checkbox"/> Yes:<br>_____<br>_____<br>_____ |
| <b>d. Problems with packaging</b>                                                                            |                                                                                                                                                                                    |                                                                                         |
| <input type="checkbox"/> Difficulty opening the packaging                                                    | <input type="checkbox"/> Pertains to all medicines<br><input type="checkbox"/> Pertains to specific medicines:<br>_____<br>_____<br>_____<br><input type="checkbox"/> I don't know | <input type="checkbox"/> No<br><input type="checkbox"/> Yes:<br>_____<br>_____<br>_____ |

| What problem did you encounter?                                                              | With which medication?                                                                                                                                                             | Did you take action?                                                                             |
|----------------------------------------------------------------------------------------------|------------------------------------------------------------------------------------------------------------------------------------------------------------------------------------|--------------------------------------------------------------------------------------------------|
| <input type="checkbox"/> Storage issues (e.g. packaging was thrown away)                     | <input type="checkbox"/> Pertains to all medicines<br><input type="checkbox"/> Pertains to specific medicines:<br>_____<br>_____<br>_____<br><input type="checkbox"/> I don't know | <input type="checkbox"/> No<br><input type="checkbox"/> Yes:<br>_____<br>_____<br>_____<br>_____ |
| <input type="checkbox"/> I cannot read or understand all the information about my medication | <input type="checkbox"/> Pertains to all medicines<br><input type="checkbox"/> Pertains to specific medicines:<br>_____<br>_____<br>_____<br><input type="checkbox"/> I don't know | <input type="checkbox"/> No<br><input type="checkbox"/> Yes:<br>_____<br>_____<br>_____<br>_____ |
| <b>e. Other problems</b>                                                                     |                                                                                                                                                                                    |                                                                                                  |
| _____<br>_____<br>_____<br>_____<br>_____                                                    | <input type="checkbox"/> Pertains to all medicines<br><input type="checkbox"/> Pertains to specific medicines:<br>_____<br>_____<br>_____<br><input type="checkbox"/> I don't know | <input type="checkbox"/> No<br><input type="checkbox"/> Yes:<br>_____<br>_____<br>_____<br>_____ |

## Notes

Here you can note specific questions for your doctor or other healthcare providers, as well as new agreements made regarding your medication.

In case of new agreements, note the date they were made and the person they were made with.

---

---

---

---

---

---

---

---

---

---

---

---

---

---

---

---

---

---

---

---

---

---

---

---

---

---

---

---

---

---

---

---

---

---

---

---

---

---

---

---

---

---

---

---

---

---

---

---

---

---

---

---

---







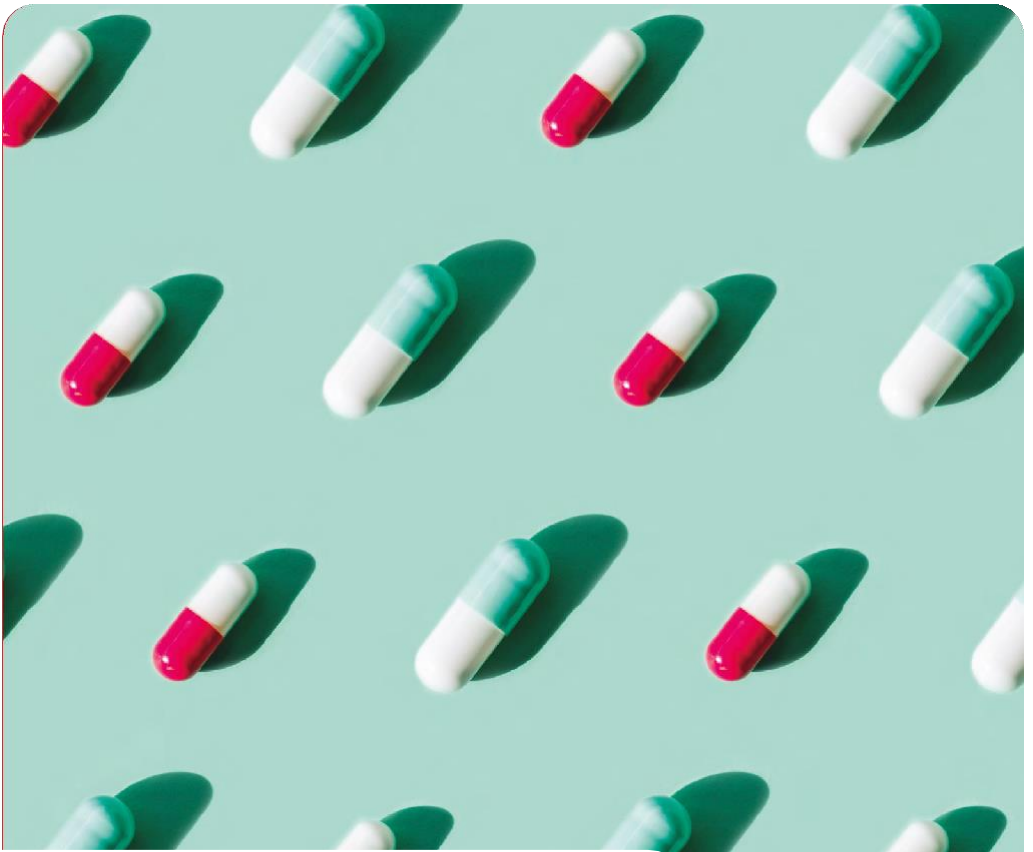

Good communication between patients and healthcare providers is crucial for treatment with medication to work well. On the one hand, it is important for the treatment to be tailored to the patient's needs, experiences and goals. On the other hand, it is important for healthcare providers to see how the patient uses and responds to the medication prescribed.

This diary allows you to record problems with your medication. This will make it easier to discuss problems with your doctor, pharmacist, nurse, or any other healthcare providers, so they can help you by tailoring your medication to your specific needs.

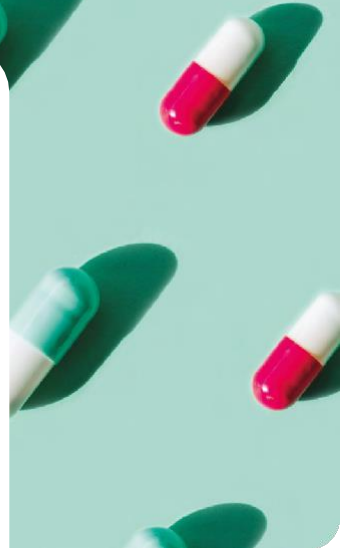

Supplement: mmc2.pdf [file mmc2.pdf]
