# Supplementary material for: The development and evaluation of a medication diary to report problems with medication use
Source: PubMed Central journal article supplement — Heliyon. 2024 Feb 9;10(4):e26127. doi: 10.1016/j.heliyon.2024.e26127 (PMC10875575; doi:10.1016/j.heliyon.2024.e26127), 2024-02-09

The background of the entire page is a light teal color, scattered with numerous capsules. Some capsules are red and white, while others are teal and white. They are arranged in a non-uniform pattern, some overlapping, creating a sense of depth and movement.

# MIJN GENEESMIDDELEN DAG BOEK

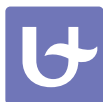

Universiteit Antwerpen  
| Faculteit Geneeskunde en  
Gezondheidswetenschappen

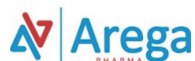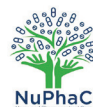

# Inhoudstafel

|                                           |    |
|-------------------------------------------|----|
| Persoonlijke informatie                   | 1  |
| Meerwaarde van een geneesmiddelendagboek  | 2  |
| Hoe vul ik het geneesmiddelschema in?     | 5  |
| Geneesmiddelschema                        | 6  |
| Informatie per geneesmiddel               | 15 |
| Hoe vul ik mijn geneesmiddelendagboek in? | 25 |
| Maandoverzicht                            | 26 |
| Probleemfiches                            | 51 |
| Notities                                  | 92 |

## Persoonlijke informatie

Naam: \_\_\_\_\_

Telefoonnummer: \_\_\_\_\_

E-mail: \_\_\_\_\_

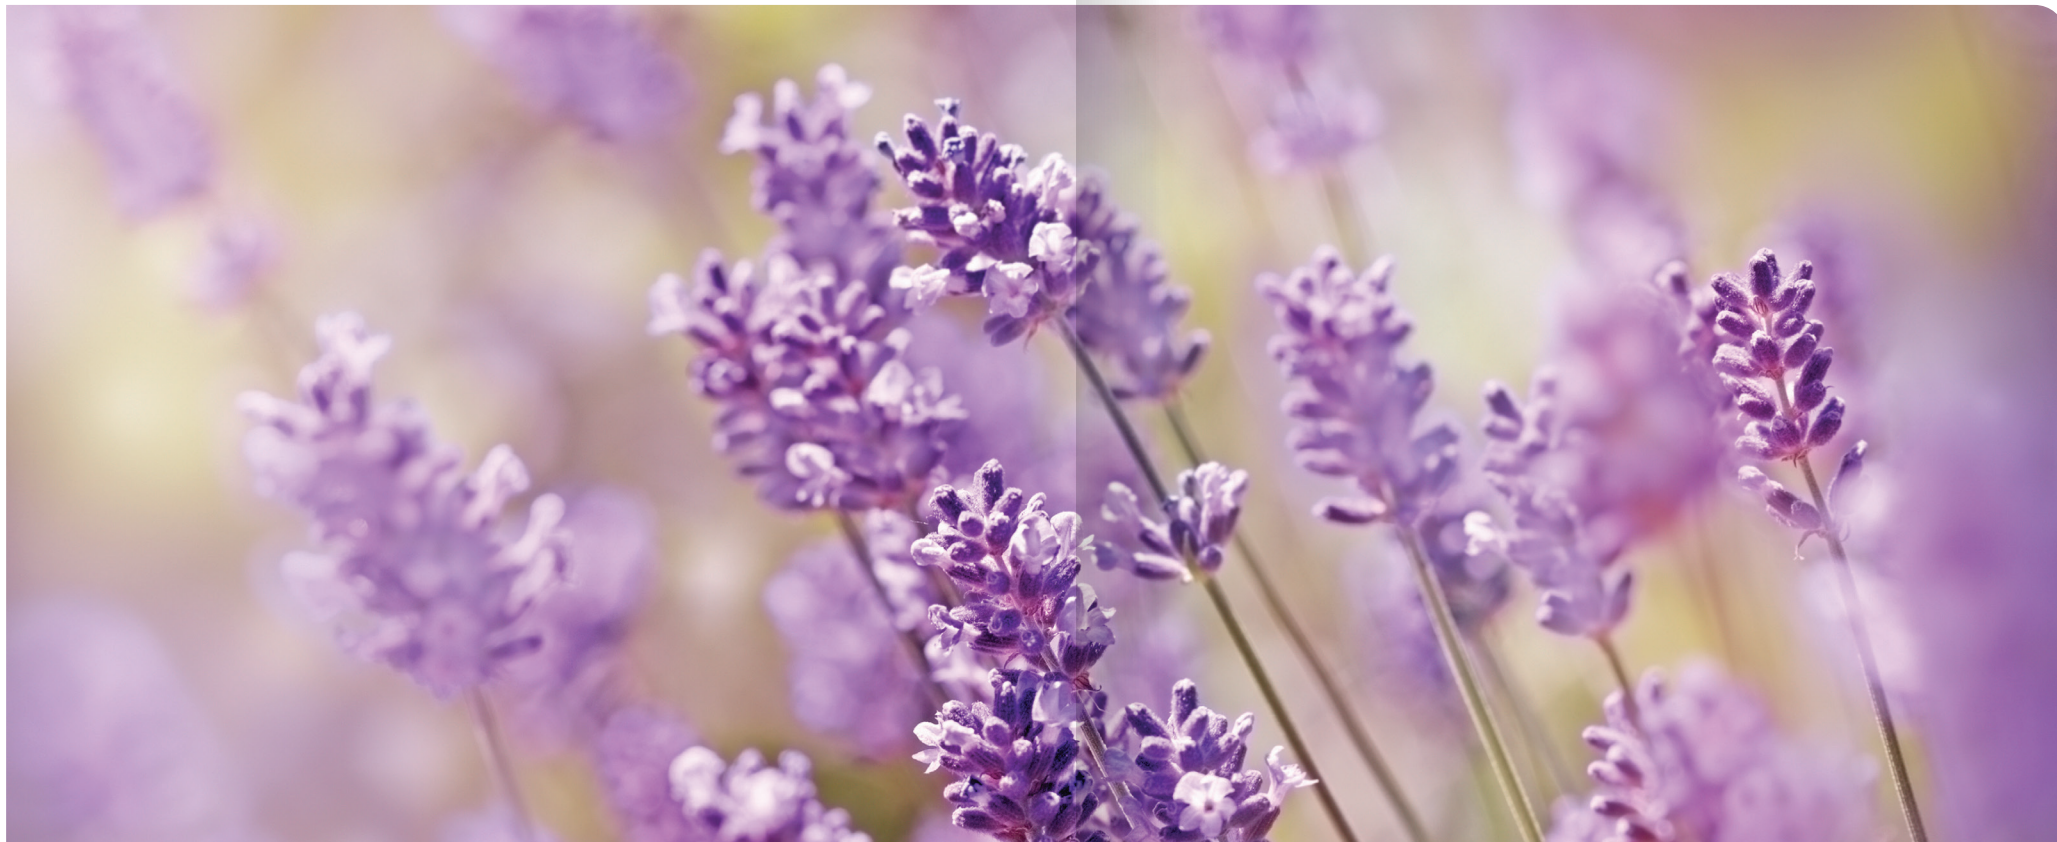

## Meerwaarde van een geneesmiddeldagboek

Een goede communicatie tussen patiënten en zorgverleners is erg belangrijk om een behandeling met geneesmiddelen goed te laten werken. Enerzijds is het belangrijk dat de behandeling kan afgestemd worden op de noden, ervaringen en doelstellingen van de patiënt. Anderzijds is het voor zorgverleners belangrijk te weten hoe het geneesmiddelengebruik verloopt bij de patiënt.

Dit dagboek biedt de mogelijkheid om problemen met uw geneesmiddelen te registreren. Dit maakt het op zijn beurt makkelijker om problemen bespreekbaar te maken bij de huisarts, apotheker, verpleegkundige of andere zorgverleners. Op deze manier kunnen zij u helpen om de geneesmiddelenzorg af te stemmen op uw noden.

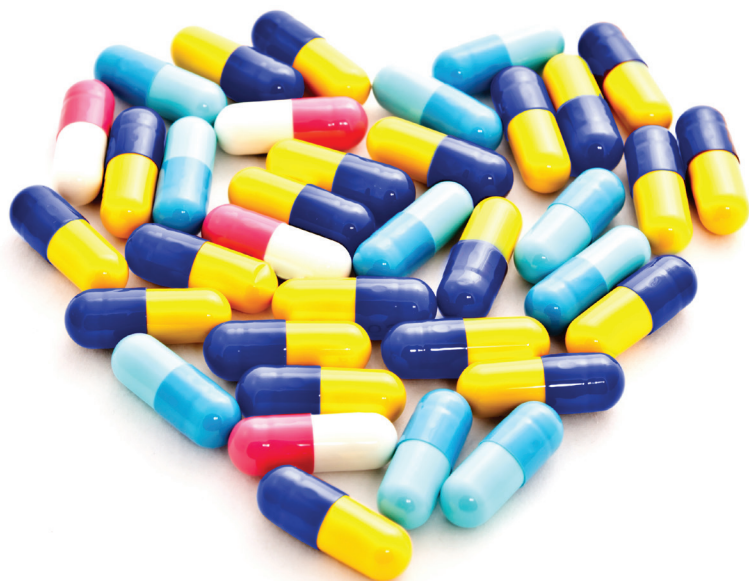

## Hoe vul ik het geneesmiddelschema in?

- Op het geneesmiddelschema kan u uw geneesmiddelen oplistten zodat u steeds een actueel overzicht bij de hand heeft.
- Noteer op het schema alle geneesmiddelen: de geneesmiddelen die werden voorgeschreven door uw arts, maar ook alle andere producten (voedingssupplementen, homeopatische geneesmiddelen,...) die u neemt voor uw gezondheid.
- Noteer bovenaan de datum waarop u het schema invulde.
- Vermeld voor elk geneesmiddel:
  - De naam
  - De indicatie: de reden waarom u het geneesmiddel moet innemen. Bijvoorbeeld: diabetes, hoge bloeddruk,...
  - De doseerfrequentie: hoe vaak u uw geneesmiddel moet innemen. Bijvoorbeeld: één maal per week op maandag, 3 keer per dag,...
  - De hoeveelheid van een geneesmiddel. Bijvoorbeeld: 1 tablet van 500 mg
  - Het tijdstip waarop het geneesmiddel moet ingenomen worden. Bijvoorbeeld: 8u, voor het ontbijt,...
  - De toedieningsweg. Bijvoorbeeld: via de mond, via de neus, via de huid,...
  - De startdatum en stopdatum, indien gekend.
- Laat het vak leeg indien u één van bovenstaande aspecten niet weet.
- Indien u een afgedrukt schema van de arts ontving, kan u dit ook in het dagboek plakken op de plaats waar u het schema zou moeten invullen.
- Vonden er wijzigingen in uw geneesmiddelschema plaats? Vul dan een nieuw geneesmiddelschema in.

## Geneesmiddelenchema

Datum van invullen: \_\_\_/\_\_\_/\_\_\_\_\_

| Merksnaam            | Indicatie | Doseerfrequentie<br>+ hoeveelheid | Tijdstip                     | Toedieningsweg | Startdatum | Stopdatum |
|----------------------|-----------|-----------------------------------|------------------------------|----------------|------------|-----------|
| Voorbeeld: Omeprazol | Maagzuur  | 1x/dag<br>1 tablet 10 mg          | Om 8 uur<br>voor het ontbijt | Mond           | 1/6/2021   | 1/7/2021  |
|                      |           |                                   |                              |                | — / — / —  | — / — / — |
|                      |           |                                   |                              |                | — / — / —  | — / — / — |
|                      |           |                                   |                              |                | — / — / —  | — / — / — |
|                      |           |                                   |                              |                | — / — / —  | — / — / — |
|                      |           |                                   |                              |                | — / — / —  | — / — / — |
|                      |           |                                   |                              |                | — / — / —  | — / — / — |
|                      |           |                                   |                              |                | — / — / —  | — / — / — |
|                      |           |                                   |                              |                | — / — / —  | — / — / — |
|                      |           |                                   |                              |                | — / — / —  | — / — / — |
|                      |           |                                   |                              |                | — / — / —  | — / — / — |
|                      |           |                                   |                              |                | — / — / —  | — / — / — |
|                      |           |                                   |                              |                | — / — / —  | — / — / — |
|                      |           |                                   |                              |                | — / — / —  | — / — / — |
|                      |           |                                   |                              |                | — / — / —  | — / — / — |

## Geneesmiddelenchema

Datum van invullen: \_\_\_/\_\_\_/\_\_\_\_\_

| Merksnaam            | Indicatie | Doseerfrequentie<br>+ hoeveelheid | Tijdstip                     | Toedieningsweg | Startdatum | Stopdatum |
|----------------------|-----------|-----------------------------------|------------------------------|----------------|------------|-----------|
| Voorbeeld: Omeprazol | Maagzuur  | 1x/dag<br>1 tablet 10 mg          | Om 8 uur<br>voor het ontbijt | Mond           | 1/6/2021   | 1/7/2021  |
|                      |           |                                   |                              |                | — / — / —  | — / — / — |
|                      |           |                                   |                              |                | — / — / —  | — / — / — |
|                      |           |                                   |                              |                | — / — / —  | — / — / — |
|                      |           |                                   |                              |                | — / — / —  | — / — / — |
|                      |           |                                   |                              |                | — / — / —  | — / — / — |
|                      |           |                                   |                              |                | — / — / —  | — / — / — |
|                      |           |                                   |                              |                | — / — / —  | — / — / — |
|                      |           |                                   |                              |                | — / — / —  | — / — / — |
|                      |           |                                   |                              |                | — / — / —  | — / — / — |
|                      |           |                                   |                              |                | — / — / —  | — / — / — |
|                      |           |                                   |                              |                | — / — / —  | — / — / — |
|                      |           |                                   |                              |                | — / — / —  | — / — / — |
|                      |           |                                   |                              |                | — / — / —  | — / — / — |
|                      |           |                                   |                              |                | — / — / —  | — / — / — |

Geneesmiddelenschema

Datum van invullen: \_\_\_/\_\_\_/\_\_\_\_\_

| Merksnaam            | Indicatie | Doseerfrequentie<br>+ hoeveelheid | Tijdstip                     | Toedieningsweg | Startdatum | Stopdatum |
|----------------------|-----------|-----------------------------------|------------------------------|----------------|------------|-----------|
| Voorbeeld: Omeprazol | Maagzuur  | 1x/dag<br>1 tablet 10 mg          | Om 8 uur<br>voor het ontbijt | Mond           | 1/6/2021   | 1/7/2021  |
|                      |           |                                   |                              |                | — / — / —  | — / — / — |
|                      |           |                                   |                              |                | — / — / —  | — / — / — |
|                      |           |                                   |                              |                | — / — / —  | — / — / — |
|                      |           |                                   |                              |                | — / — / —  | — / — / — |
|                      |           |                                   |                              |                | — / — / —  | — / — / — |
|                      |           |                                   |                              |                | — / — / —  | — / — / — |
|                      |           |                                   |                              |                | — / — / —  | — / — / — |
|                      |           |                                   |                              |                | — / — / —  | — / — / — |
|                      |           |                                   |                              |                | — / — / —  | — / — / — |
|                      |           |                                   |                              |                | — / — / —  | — / — / — |
|                      |           |                                   |                              |                | — / — / —  | — / — / — |
|                      |           |                                   |                              |                | — / — / —  | — / — / — |
|                      |           |                                   |                              |                | — / — / —  | — / — / — |
|                      |           |                                   |                              |                | — / — / —  | — / — / — |

# Geneesmiddelenchema

Datum van invullen: \_\_\_/\_\_\_/\_\_\_

| Merksnaam            | Indicatie | Doseerfrequentie<br>+ hoeveelheid | Tijdstip                     | Toedieningsweg | Startdatum | Stopdatum |
|----------------------|-----------|-----------------------------------|------------------------------|----------------|------------|-----------|
| Voorbeeld: Omeprazol | Maagzuur  | 1x/dag<br>1 tablet 10 mg          | Om 8 uur<br>voor het ontbijt | Mond           | 1/6/2021   | 1/7/2021  |
|                      |           |                                   |                              |                | — / — / —  | — / — / — |
|                      |           |                                   |                              |                | — / — / —  | — / — / — |
|                      |           |                                   |                              |                | — / — / —  | — / — / — |
|                      |           |                                   |                              |                | — / — / —  | — / — / — |
|                      |           |                                   |                              |                | — / — / —  | — / — / — |
|                      |           |                                   |                              |                | — / — / —  | — / — / — |
|                      |           |                                   |                              |                | — / — / —  | — / — / — |
|                      |           |                                   |                              |                | — / — / —  | — / — / — |
|                      |           |                                   |                              |                | — / — / —  | — / — / — |
|                      |           |                                   |                              |                | — / — / —  | — / — / — |
|                      |           |                                   |                              |                | — / — / —  | — / — / — |
|                      |           |                                   |                              |                | — / — / —  | — / — / — |
|                      |           |                                   |                              |                | — / — / —  | — / — / — |
|                      |           |                                   |                              |                | — / — / —  | — / — / — |



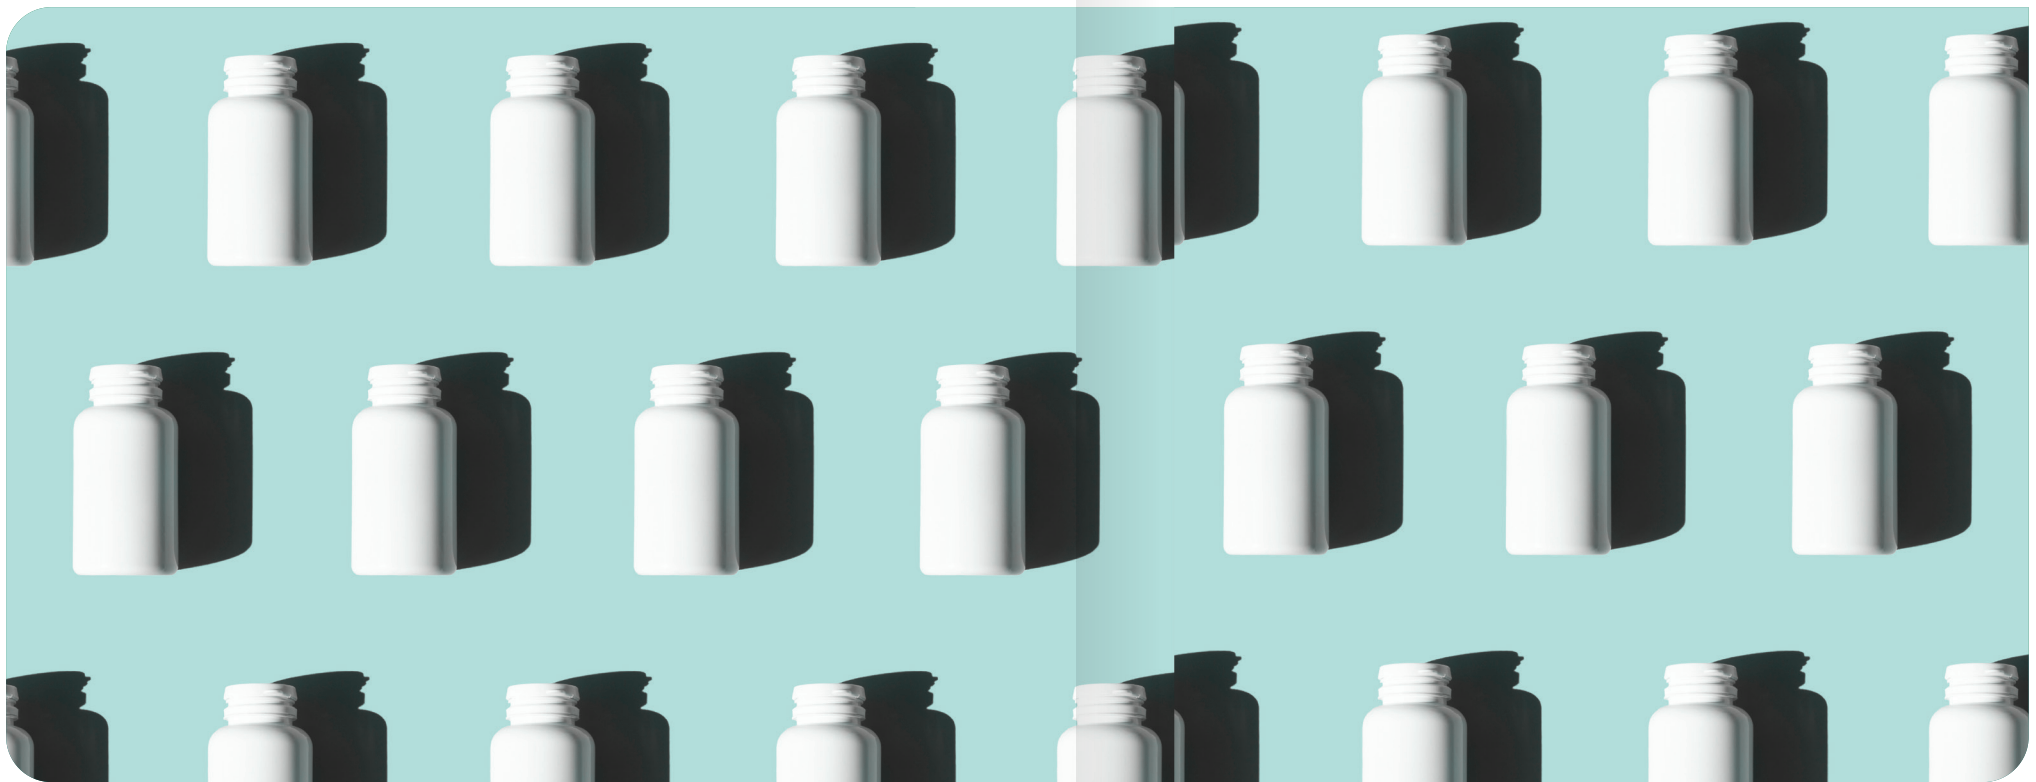

## Informatie per geneesmiddel

U kan voor elk geneesmiddel vrijblijvend een fiche invullen waar u specifieke informatie noteert zoals veel voorkomende bijwerkingen of te nemen voorzorgsmaatregelen.

# Naam geneesmiddel:

Waarop moet ik letten wanneer ik het geneesmiddel neem?

---

---

---

---

---

---

---

---

Welke ongewenste effecten kan dit geneesmiddel veroorzaken?

---

---

---

---

---

---

---

---

Welke andere informatie over het geneesmiddel is voor mij van belang?

---

---

---

---

---

---

---

---

# Naam geneesmiddel:

Waarop moet ik letten wanneer ik het geneesmiddel neem?

---

---

---

---

---

---

---

---

Welke ongewenste effecten kan dit geneesmiddel veroorzaken?

---

---

---

---

---

---

---

---

Welke andere informatie over het geneesmiddel is voor mij van belang?

---

---

---

---

---

---

---

---

# Naam geneesmiddel:

Waarop moet ik letten wanneer ik het geneesmiddel neem?

---

---

---

---

---

---

---

---

Welke ongewenste effecten kan dit geneesmiddel veroorzaken?

---

---

---

---

---

---

---

---

Welke andere informatie over het geneesmiddel is voor mij van belang?

---

---

---

---

---

---

---

---

# Naam geneesmiddel:

Waarop moet ik letten wanneer ik het geneesmiddel neem?

---

---

---

---

---

---

---

---

Welke ongewenste effecten kan dit geneesmiddel veroorzaken?

---

---

---

---

---

---

---

---

Welke andere informatie over het geneesmiddel is voor mij van belang?

---

---

---

---

---

---

---

---

# Naam geneesmiddel:

Waarop moet ik letten wanneer ik het geneesmiddel neem?

---

---

---

---

---

---

---

---

Welke ongewenste effecten kan dit geneesmiddel veroorzaken?

---

---

---

---

---

---

---

---

Welke andere informatie over het geneesmiddel is voor mij van belang?

---

---

---

---

---

---

---

---

# Naam geneesmiddel:

Waarop moet ik letten wanneer ik het geneesmiddel neem?

---

---

---

---

---

---

---

---

Welke ongewenste effecten kan dit geneesmiddel veroorzaken?

---

---

---

---

---

---

---

---

Welke andere informatie over het geneesmiddel is voor mij van belang?

---

---

---

---

---

---

---

---

# Naam geneesmiddel:

Waarop moet ik letten wanneer ik het geneesmiddel neem?

---

---

---

---

---

---

---

---

Welke ongewenste effecten kan dit geneesmiddel veroorzaken?

---

---

---

---

---

---

---

---

Welke andere informatie over het geneesmiddel is voor mij van belang?

---

---

---

---

---

---

---

---

# Naam geneesmiddel:

Waarop moet ik letten wanneer ik het geneesmiddel neem?

---

---

---

---

---

---

---

---

Welke ongewenste effecten kan dit geneesmiddel veroorzaken?

---

---

---

---

---

---

---

---

Welke andere informatie over het geneesmiddel is voor mij van belang?

---

---

---

---

---

---

---

---

**Belangrijk:** Er zijn geen goede of foute antwoorden. Probeer het dagboek zo eerlijk mogelijk in te vullen.

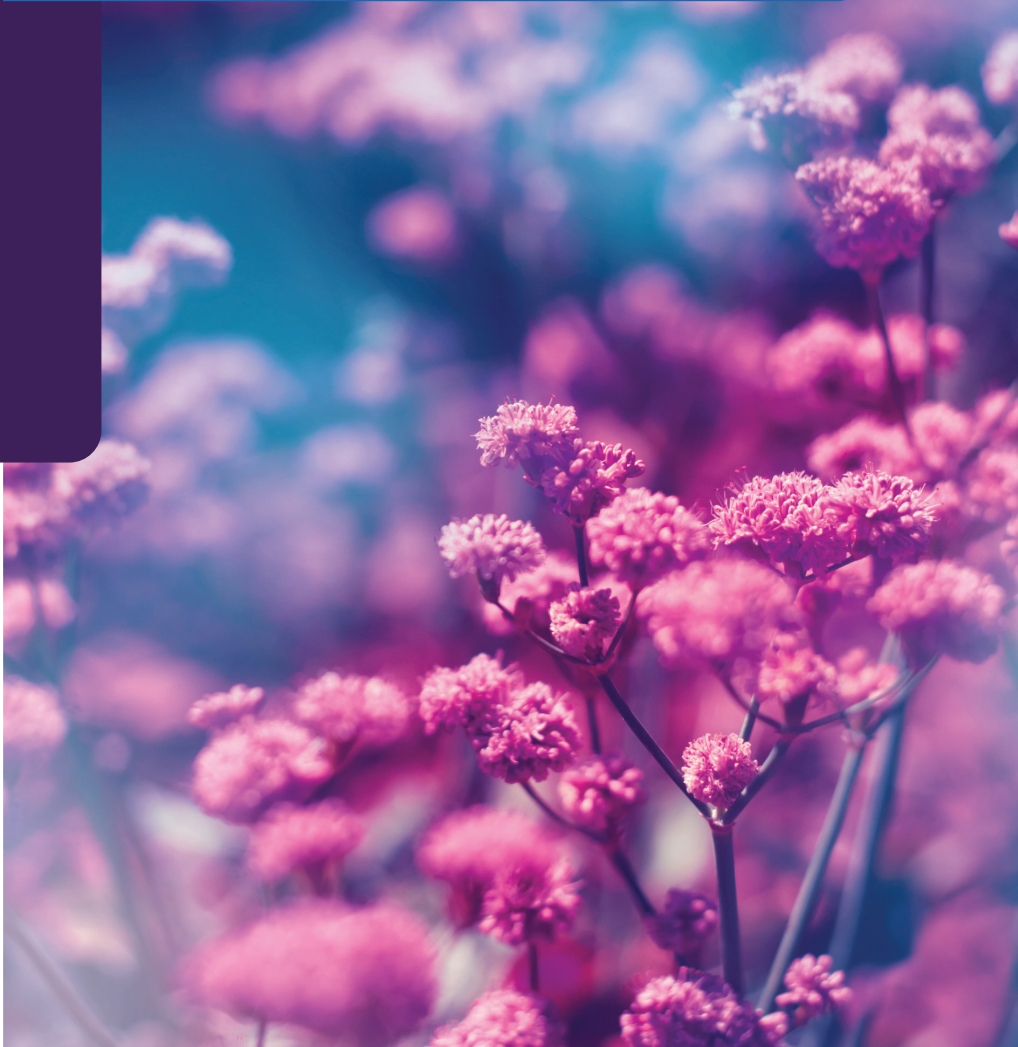

## Hoe vul ik mijn geneesmiddelendagboek in?

Het dagboek bestaat uit een maandoverzicht, probleemfiches en notities.

### Maandoverzicht

- Kruis in het maandoverzicht per dag aan of u al dan niet problemen met uw geneesmiddelen ondervond.
- Indien u uw geneesmiddelen gedurende een bepaalde periode niet zelf kon beheren, bijvoorbeeld omwille van opname in het ziekenhuis, dan kan u dit invullen onderaan het maandoverzicht.

### Probleemfiches

- U moet enkel en alleen een probleemfiche invullen indien u op een bepaalde dag of gedurende een bepaalde periode een probleem met uw geneesmiddelen ondervond. Indien u geen problemen ondervond, vult u geen probleemfiche in.
- Noteer bovenaan steeds de datum van de dag waarop u problemen ondervond (voorbeeld: 1/01/2021) of indien de problemen langere tijd aanhouden kan u ook een periode invullen (voorbeeld 1/01/2021 tot 14/01/2021).
- Kruis aan welke problemen u concreet ondervond en voor welke geneesmiddelen.
- Noteer of u bepaalde acties ondernam (voorbeeld: arts, thuisverpleegkundige, apotheker,... contacteren).

### Notities

Heeft u specifieke vragen voor de arts of een andere zorgverlener? Werden er nieuwe afspraken gemaakt over uw geneesmiddelen? Dan kan u ze noteren bij notities achteraan in het dagboek.

# Maandoverzicht januari

| Jaar: _____ | Ik ondervond<br><b>PROBLEMEN</b> | Ik ondervond<br><b>GEEN</b> problemen |
|-------------|----------------------------------|---------------------------------------|
| 1 jan       | <input type="checkbox"/>         | <input type="checkbox"/>              |
| 2 jan       | <input type="checkbox"/>         | <input type="checkbox"/>              |
| 3 jan       | <input type="checkbox"/>         | <input type="checkbox"/>              |
| 4 jan       | <input type="checkbox"/>         | <input type="checkbox"/>              |
| 5 jan       | <input type="checkbox"/>         | <input type="checkbox"/>              |
| 6 jan       | <input type="checkbox"/>         | <input type="checkbox"/>              |
| 7 jan       | <input type="checkbox"/>         | <input type="checkbox"/>              |
| 8 jan       | <input type="checkbox"/>         | <input type="checkbox"/>              |
| 9 jan       | <input type="checkbox"/>         | <input type="checkbox"/>              |
| 10 jan      | <input type="checkbox"/>         | <input type="checkbox"/>              |
| 11 jan      | <input type="checkbox"/>         | <input type="checkbox"/>              |
| 12 jan      | <input type="checkbox"/>         | <input type="checkbox"/>              |
| 13 jan      | <input type="checkbox"/>         | <input type="checkbox"/>              |
| 14 jan      | <input type="checkbox"/>         | <input type="checkbox"/>              |
| 15 jan      | <input type="checkbox"/>         | <input type="checkbox"/>              |
| 16 jan      | <input type="checkbox"/>         | <input type="checkbox"/>              |
| 17 jan      | <input type="checkbox"/>         | <input type="checkbox"/>              |
| 18 jan      | <input type="checkbox"/>         | <input type="checkbox"/>              |
| 19 jan      | <input type="checkbox"/>         | <input type="checkbox"/>              |
| 20 jan      | <input type="checkbox"/>         | <input type="checkbox"/>              |
| 21 jan      | <input type="checkbox"/>         | <input type="checkbox"/>              |
| 22 jan      | <input type="checkbox"/>         | <input type="checkbox"/>              |
| 23 jan      | <input type="checkbox"/>         | <input type="checkbox"/>              |
| 24 jan      | <input type="checkbox"/>         | <input type="checkbox"/>              |
| 25 jan      | <input type="checkbox"/>         | <input type="checkbox"/>              |
| 26 jan      | <input type="checkbox"/>         | <input type="checkbox"/>              |
| 27 jan      | <input type="checkbox"/>         | <input type="checkbox"/>              |
| 28 jan      | <input type="checkbox"/>         | <input type="checkbox"/>              |
| 29 jan      | <input type="checkbox"/>         | <input type="checkbox"/>              |
| 30 jan      | <input type="checkbox"/>         | <input type="checkbox"/>              |
| 31 jan      | <input type="checkbox"/>         | <input type="checkbox"/>              |

Ik beheerde mijn geneesmiddelen niet zelf van \_\_\_ / \_\_\_ / \_\_\_ tot \_\_\_ / \_\_\_ / \_\_\_

Reden: \_\_\_\_\_

# Maandoverzicht februari

| Jaar: _____ | Ik ondervond<br><b>PROBLEMEN</b> | Ik ondervond<br><b>GEEN</b> problemen |
|-------------|----------------------------------|---------------------------------------|
| 1 feb       | <input type="checkbox"/>         | <input type="checkbox"/>              |
| 2 feb       | <input type="checkbox"/>         | <input type="checkbox"/>              |
| 3 feb       | <input type="checkbox"/>         | <input type="checkbox"/>              |
| 4 feb       | <input type="checkbox"/>         | <input type="checkbox"/>              |
| 5 feb       | <input type="checkbox"/>         | <input type="checkbox"/>              |
| 6 feb       | <input type="checkbox"/>         | <input type="checkbox"/>              |
| 7 feb       | <input type="checkbox"/>         | <input type="checkbox"/>              |
| 8 feb       | <input type="checkbox"/>         | <input type="checkbox"/>              |
| 9 feb       | <input type="checkbox"/>         | <input type="checkbox"/>              |
| 10 feb      | <input type="checkbox"/>         | <input type="checkbox"/>              |
| 11 feb      | <input type="checkbox"/>         | <input type="checkbox"/>              |
| 12 feb      | <input type="checkbox"/>         | <input type="checkbox"/>              |
| 13 feb      | <input type="checkbox"/>         | <input type="checkbox"/>              |
| 14 feb      | <input type="checkbox"/>         | <input type="checkbox"/>              |
| 15 feb      | <input type="checkbox"/>         | <input type="checkbox"/>              |
| 16 feb      | <input type="checkbox"/>         | <input type="checkbox"/>              |
| 17 feb      | <input type="checkbox"/>         | <input type="checkbox"/>              |
| 18 feb      | <input type="checkbox"/>         | <input type="checkbox"/>              |
| 19 feb      | <input type="checkbox"/>         | <input type="checkbox"/>              |
| 20 feb      | <input type="checkbox"/>         | <input type="checkbox"/>              |
| 21 feb      | <input type="checkbox"/>         | <input type="checkbox"/>              |
| 22 feb      | <input type="checkbox"/>         | <input type="checkbox"/>              |
| 23 feb      | <input type="checkbox"/>         | <input type="checkbox"/>              |
| 24 feb      | <input type="checkbox"/>         | <input type="checkbox"/>              |
| 25 feb      | <input type="checkbox"/>         | <input type="checkbox"/>              |
| 26 feb      | <input type="checkbox"/>         | <input type="checkbox"/>              |
| 27 feb      | <input type="checkbox"/>         | <input type="checkbox"/>              |
| 28 feb      | <input type="checkbox"/>         | <input type="checkbox"/>              |
| [29 feb]    | <input type="checkbox"/>         | <input type="checkbox"/>              |

Ik beheerde mijn geneesmiddelen niet zelf van \_\_\_ / \_\_\_ / \_\_\_ tot \_\_\_ / \_\_\_ / \_\_\_

Reden: \_\_\_\_\_

# Maandoverzicht maart

| Jaar: _____ | Ik ondervond<br><b>PROBLEMEN</b> | Ik ondervond<br><b>GEEN</b> problemen |
|-------------|----------------------------------|---------------------------------------|
| 1 mrt       | <input type="checkbox"/>         | <input type="checkbox"/>              |
| 2 mrt       | <input type="checkbox"/>         | <input type="checkbox"/>              |
| 3 mrt       | <input type="checkbox"/>         | <input type="checkbox"/>              |
| 4 mrt       | <input type="checkbox"/>         | <input type="checkbox"/>              |
| 5 mrt       | <input type="checkbox"/>         | <input type="checkbox"/>              |
| 6 mrt       | <input type="checkbox"/>         | <input type="checkbox"/>              |
| 7 mrt       | <input type="checkbox"/>         | <input type="checkbox"/>              |
| 8 mrt       | <input type="checkbox"/>         | <input type="checkbox"/>              |
| 9 mrt       | <input type="checkbox"/>         | <input type="checkbox"/>              |
| 10 mrt      | <input type="checkbox"/>         | <input type="checkbox"/>              |
| 11 mrt      | <input type="checkbox"/>         | <input type="checkbox"/>              |
| 12 mrt      | <input type="checkbox"/>         | <input type="checkbox"/>              |
| 13 mrt      | <input type="checkbox"/>         | <input type="checkbox"/>              |
| 14 mrt      | <input type="checkbox"/>         | <input type="checkbox"/>              |
| 15 mrt      | <input type="checkbox"/>         | <input type="checkbox"/>              |
| 16 mrt      | <input type="checkbox"/>         | <input type="checkbox"/>              |
| 17 mrt      | <input type="checkbox"/>         | <input type="checkbox"/>              |
| 18 mrt      | <input type="checkbox"/>         | <input type="checkbox"/>              |
| 19 mrt      | <input type="checkbox"/>         | <input type="checkbox"/>              |
| 20 mrt      | <input type="checkbox"/>         | <input type="checkbox"/>              |
| 21 mrt      | <input type="checkbox"/>         | <input type="checkbox"/>              |
| 22 mrt      | <input type="checkbox"/>         | <input type="checkbox"/>              |
| 23 mrt      | <input type="checkbox"/>         | <input type="checkbox"/>              |
| 24 mrt      | <input type="checkbox"/>         | <input type="checkbox"/>              |
| 25 mrt      | <input type="checkbox"/>         | <input type="checkbox"/>              |
| 26 mrt      | <input type="checkbox"/>         | <input type="checkbox"/>              |
| 27 mrt      | <input type="checkbox"/>         | <input type="checkbox"/>              |
| 28 mrt      | <input type="checkbox"/>         | <input type="checkbox"/>              |
| 29 mrt      | <input type="checkbox"/>         | <input type="checkbox"/>              |
| 30 mrt      | <input type="checkbox"/>         | <input type="checkbox"/>              |
| 31 mrt      | <input type="checkbox"/>         | <input type="checkbox"/>              |

Ik beheerde mijn geneesmiddelen niet zelf van \_\_\_ / \_\_\_ / \_\_\_ tot \_\_\_ / \_\_\_ / \_\_\_

Reden: \_\_\_\_\_

\_\_\_\_\_

# Maandoverzicht april

| Jaar: _____ | Ik ondervond<br><b>PROBLEMEN</b> | Ik ondervond<br><b>GEEN</b> problemen |
|-------------|----------------------------------|---------------------------------------|
| 1 apr       | <input type="checkbox"/>         | <input type="checkbox"/>              |
| 2 apr       | <input type="checkbox"/>         | <input type="checkbox"/>              |
| 3 apr       | <input type="checkbox"/>         | <input type="checkbox"/>              |
| 4 apr       | <input type="checkbox"/>         | <input type="checkbox"/>              |
| 5 apr       | <input type="checkbox"/>         | <input type="checkbox"/>              |
| 6 apr       | <input type="checkbox"/>         | <input type="checkbox"/>              |
| 7 apr       | <input type="checkbox"/>         | <input type="checkbox"/>              |
| 8 apr       | <input type="checkbox"/>         | <input type="checkbox"/>              |
| 9 apr       | <input type="checkbox"/>         | <input type="checkbox"/>              |
| 10 apr      | <input type="checkbox"/>         | <input type="checkbox"/>              |
| 11 apr      | <input type="checkbox"/>         | <input type="checkbox"/>              |
| 12 apr      | <input type="checkbox"/>         | <input type="checkbox"/>              |
| 13 apr      | <input type="checkbox"/>         | <input type="checkbox"/>              |
| 14 apr      | <input type="checkbox"/>         | <input type="checkbox"/>              |
| 15 apr      | <input type="checkbox"/>         | <input type="checkbox"/>              |
| 16 apr      | <input type="checkbox"/>         | <input type="checkbox"/>              |
| 17 apr      | <input type="checkbox"/>         | <input type="checkbox"/>              |
| 18 apr      | <input type="checkbox"/>         | <input type="checkbox"/>              |
| 19 apr      | <input type="checkbox"/>         | <input type="checkbox"/>              |
| 20 apr      | <input type="checkbox"/>         | <input type="checkbox"/>              |
| 21 apr      | <input type="checkbox"/>         | <input type="checkbox"/>              |
| 22 apr      | <input type="checkbox"/>         | <input type="checkbox"/>              |
| 23 apr      | <input type="checkbox"/>         | <input type="checkbox"/>              |
| 24 apr      | <input type="checkbox"/>         | <input type="checkbox"/>              |
| 25 apr      | <input type="checkbox"/>         | <input type="checkbox"/>              |
| 26 apr      | <input type="checkbox"/>         | <input type="checkbox"/>              |
| 27 apr      | <input type="checkbox"/>         | <input type="checkbox"/>              |
| 28 apr      | <input type="checkbox"/>         | <input type="checkbox"/>              |
| 29 apr      | <input type="checkbox"/>         | <input type="checkbox"/>              |
| 30 apr      | <input type="checkbox"/>         | <input type="checkbox"/>              |

Ik beheerde mijn geneesmiddelen niet zelf van \_\_\_ / \_\_\_ / \_\_\_ tot \_\_\_ / \_\_\_ / \_\_\_

Reden: \_\_\_\_\_

\_\_\_\_\_



# Maandoverzicht mei

| Jaar: _____ | Ik ondervond<br><b>PROBLEMEN</b> | Ik ondervond<br><b>GEEN</b> problemen |
|-------------|----------------------------------|---------------------------------------|
| 1 mei       | <input type="checkbox"/>         | <input type="checkbox"/>              |
| 2 mei       | <input type="checkbox"/>         | <input type="checkbox"/>              |
| 3 mei       | <input type="checkbox"/>         | <input type="checkbox"/>              |
| 4 mei       | <input type="checkbox"/>         | <input type="checkbox"/>              |
| 5 mei       | <input type="checkbox"/>         | <input type="checkbox"/>              |
| 6 mei       | <input type="checkbox"/>         | <input type="checkbox"/>              |
| 7 mei       | <input type="checkbox"/>         | <input type="checkbox"/>              |
| 8 mei       | <input type="checkbox"/>         | <input type="checkbox"/>              |
| 9 mei       | <input type="checkbox"/>         | <input type="checkbox"/>              |
| 10 mei      | <input type="checkbox"/>         | <input type="checkbox"/>              |
| 11 mei      | <input type="checkbox"/>         | <input type="checkbox"/>              |
| 12 mei      | <input type="checkbox"/>         | <input type="checkbox"/>              |
| 13 mei      | <input type="checkbox"/>         | <input type="checkbox"/>              |
| 14 mei      | <input type="checkbox"/>         | <input type="checkbox"/>              |
| 15 mei      | <input type="checkbox"/>         | <input type="checkbox"/>              |
| 16 mei      | <input type="checkbox"/>         | <input type="checkbox"/>              |
| 17 mei      | <input type="checkbox"/>         | <input type="checkbox"/>              |
| 18 mei      | <input type="checkbox"/>         | <input type="checkbox"/>              |
| 19 mei      | <input type="checkbox"/>         | <input type="checkbox"/>              |
| 20 mei      | <input type="checkbox"/>         | <input type="checkbox"/>              |
| 21 mei      | <input type="checkbox"/>         | <input type="checkbox"/>              |
| 22 mei      | <input type="checkbox"/>         | <input type="checkbox"/>              |
| 23 mei      | <input type="checkbox"/>         | <input type="checkbox"/>              |
| 24 mei      | <input type="checkbox"/>         | <input type="checkbox"/>              |
| 25 mei      | <input type="checkbox"/>         | <input type="checkbox"/>              |
| 26 mei      | <input type="checkbox"/>         | <input type="checkbox"/>              |
| 27 mei      | <input type="checkbox"/>         | <input type="checkbox"/>              |
| 28 mei      | <input type="checkbox"/>         | <input type="checkbox"/>              |
| 29 mei      | <input type="checkbox"/>         | <input type="checkbox"/>              |
| 30 mei      | <input type="checkbox"/>         | <input type="checkbox"/>              |
| 31 mei      | <input type="checkbox"/>         | <input type="checkbox"/>              |

Ik beheerde mijn geneesmiddelen niet zelf van \_\_\_ / \_\_\_ / \_\_\_ tot \_\_\_ / \_\_\_ / \_\_\_

Reden: \_\_\_\_\_

# Maandoverzicht juni

| Jaar: _____ | Ik ondervond<br><b>PROBLEMEN</b> | Ik ondervond<br><b>GEEN</b> problemen |
|-------------|----------------------------------|---------------------------------------|
| 1 juni      | <input type="checkbox"/>         | <input type="checkbox"/>              |
| 2 juni      | <input type="checkbox"/>         | <input type="checkbox"/>              |
| 3 juni      | <input type="checkbox"/>         | <input type="checkbox"/>              |
| 4 juni      | <input type="checkbox"/>         | <input type="checkbox"/>              |
| 5 juni      | <input type="checkbox"/>         | <input type="checkbox"/>              |
| 6 juni      | <input type="checkbox"/>         | <input type="checkbox"/>              |
| 7 juni      | <input type="checkbox"/>         | <input type="checkbox"/>              |
| 8 juni      | <input type="checkbox"/>         | <input type="checkbox"/>              |
| 9 juni      | <input type="checkbox"/>         | <input type="checkbox"/>              |
| 10 juni     | <input type="checkbox"/>         | <input type="checkbox"/>              |
| 11 juni     | <input type="checkbox"/>         | <input type="checkbox"/>              |
| 12 juni     | <input type="checkbox"/>         | <input type="checkbox"/>              |
| 13 juni     | <input type="checkbox"/>         | <input type="checkbox"/>              |
| 14 juni     | <input type="checkbox"/>         | <input type="checkbox"/>              |
| 15 juni     | <input type="checkbox"/>         | <input type="checkbox"/>              |
| 16 juni     | <input type="checkbox"/>         | <input type="checkbox"/>              |
| 17 juni     | <input type="checkbox"/>         | <input type="checkbox"/>              |
| 18 juni     | <input type="checkbox"/>         | <input type="checkbox"/>              |
| 19 juni     | <input type="checkbox"/>         | <input type="checkbox"/>              |
| 20 juni     | <input type="checkbox"/>         | <input type="checkbox"/>              |
| 21 juni     | <input type="checkbox"/>         | <input type="checkbox"/>              |
| 22 juni     | <input type="checkbox"/>         | <input type="checkbox"/>              |
| 23 juni     | <input type="checkbox"/>         | <input type="checkbox"/>              |
| 24 juni     | <input type="checkbox"/>         | <input type="checkbox"/>              |
| 25 juni     | <input type="checkbox"/>         | <input type="checkbox"/>              |
| 26 juni     | <input type="checkbox"/>         | <input type="checkbox"/>              |
| 27 juni     | <input type="checkbox"/>         | <input type="checkbox"/>              |
| 28 juni     | <input type="checkbox"/>         | <input type="checkbox"/>              |
| 29 juni     | <input type="checkbox"/>         | <input type="checkbox"/>              |
| 30 juni     | <input type="checkbox"/>         | <input type="checkbox"/>              |

Ik beheerde mijn geneesmiddelen niet zelf van \_\_\_ / \_\_\_ / \_\_\_ tot \_\_\_ / \_\_\_ / \_\_\_

Reden: \_\_\_\_\_

# Maandoverzicht juli

| Jaar: _____ | Ik ondervond<br><b>PROBLEMEN</b> | Ik ondervond<br><b>GEEN</b> problemen |
|-------------|----------------------------------|---------------------------------------|
| 1 juli      | <input type="checkbox"/>         | <input type="checkbox"/>              |
| 2 juli      | <input type="checkbox"/>         | <input type="checkbox"/>              |
| 3 juli      | <input type="checkbox"/>         | <input type="checkbox"/>              |
| 4 juli      | <input type="checkbox"/>         | <input type="checkbox"/>              |
| 5 juli      | <input type="checkbox"/>         | <input type="checkbox"/>              |
| 6 juli      | <input type="checkbox"/>         | <input type="checkbox"/>              |
| 7 juli      | <input type="checkbox"/>         | <input type="checkbox"/>              |
| 8 juli      | <input type="checkbox"/>         | <input type="checkbox"/>              |
| 9 juli      | <input type="checkbox"/>         | <input type="checkbox"/>              |
| 10 juli     | <input type="checkbox"/>         | <input type="checkbox"/>              |
| 11 juli     | <input type="checkbox"/>         | <input type="checkbox"/>              |
| 12 juli     | <input type="checkbox"/>         | <input type="checkbox"/>              |
| 13 juli     | <input type="checkbox"/>         | <input type="checkbox"/>              |
| 14 juli     | <input type="checkbox"/>         | <input type="checkbox"/>              |
| 15 juli     | <input type="checkbox"/>         | <input type="checkbox"/>              |
| 16 juli     | <input type="checkbox"/>         | <input type="checkbox"/>              |
| 17 juli     | <input type="checkbox"/>         | <input type="checkbox"/>              |
| 18 juli     | <input type="checkbox"/>         | <input type="checkbox"/>              |
| 19 juli     | <input type="checkbox"/>         | <input type="checkbox"/>              |
| 20 juli     | <input type="checkbox"/>         | <input type="checkbox"/>              |
| 21 juli     | <input type="checkbox"/>         | <input type="checkbox"/>              |
| 22 juli     | <input type="checkbox"/>         | <input type="checkbox"/>              |
| 23 juli     | <input type="checkbox"/>         | <input type="checkbox"/>              |
| 24 juli     | <input type="checkbox"/>         | <input type="checkbox"/>              |
| 25 juli     | <input type="checkbox"/>         | <input type="checkbox"/>              |
| 26 juli     | <input type="checkbox"/>         | <input type="checkbox"/>              |
| 27 juli     | <input type="checkbox"/>         | <input type="checkbox"/>              |
| 28 juli     | <input type="checkbox"/>         | <input type="checkbox"/>              |
| 29 juli     | <input type="checkbox"/>         | <input type="checkbox"/>              |
| 30 juli     | <input type="checkbox"/>         | <input type="checkbox"/>              |
| 31 juli     | <input type="checkbox"/>         | <input type="checkbox"/>              |

Ik beheerde mijn geneesmiddelen niet zelf van \_\_\_ / \_\_\_ / \_\_\_ tot \_\_\_ / \_\_\_ / \_\_\_

Reden: \_\_\_\_\_

\_\_\_\_\_

# Maandoverzicht augustus

| Jaar: _____ | Ik ondervond<br><b>PROBLEMEN</b> | Ik ondervond<br><b>GEEN</b> problemen |
|-------------|----------------------------------|---------------------------------------|
| 1 aug       | <input type="checkbox"/>         | <input type="checkbox"/>              |
| 2 aug       | <input type="checkbox"/>         | <input type="checkbox"/>              |
| 3 aug       | <input type="checkbox"/>         | <input type="checkbox"/>              |
| 4 aug       | <input type="checkbox"/>         | <input type="checkbox"/>              |
| 5 aug       | <input type="checkbox"/>         | <input type="checkbox"/>              |
| 6 aug       | <input type="checkbox"/>         | <input type="checkbox"/>              |
| 7 aug       | <input type="checkbox"/>         | <input type="checkbox"/>              |
| 8 aug       | <input type="checkbox"/>         | <input type="checkbox"/>              |
| 9 aug       | <input type="checkbox"/>         | <input type="checkbox"/>              |
| 10 aug      | <input type="checkbox"/>         | <input type="checkbox"/>              |
| 11 aug      | <input type="checkbox"/>         | <input type="checkbox"/>              |
| 12 aug      | <input type="checkbox"/>         | <input type="checkbox"/>              |
| 13 aug      | <input type="checkbox"/>         | <input type="checkbox"/>              |
| 14 aug      | <input type="checkbox"/>         | <input type="checkbox"/>              |
| 15 aug      | <input type="checkbox"/>         | <input type="checkbox"/>              |
| 16 aug      | <input type="checkbox"/>         | <input type="checkbox"/>              |
| 17 aug      | <input type="checkbox"/>         | <input type="checkbox"/>              |
| 18 aug      | <input type="checkbox"/>         | <input type="checkbox"/>              |
| 19 aug      | <input type="checkbox"/>         | <input type="checkbox"/>              |
| 20 aug      | <input type="checkbox"/>         | <input type="checkbox"/>              |
| 21 aug      | <input type="checkbox"/>         | <input type="checkbox"/>              |
| 22 aug      | <input type="checkbox"/>         | <input type="checkbox"/>              |
| 23 aug      | <input type="checkbox"/>         | <input type="checkbox"/>              |
| 24 aug      | <input type="checkbox"/>         | <input type="checkbox"/>              |
| 25 aug      | <input type="checkbox"/>         | <input type="checkbox"/>              |
| 26 aug      | <input type="checkbox"/>         | <input type="checkbox"/>              |
| 27 aug      | <input type="checkbox"/>         | <input type="checkbox"/>              |
| 28 aug      | <input type="checkbox"/>         | <input type="checkbox"/>              |
| 29 aug      | <input type="checkbox"/>         | <input type="checkbox"/>              |
| 30 aug      | <input type="checkbox"/>         | <input type="checkbox"/>              |
| 31 aug      | <input type="checkbox"/>         | <input type="checkbox"/>              |

Ik beheerde mijn geneesmiddelen niet zelf van \_\_\_ / \_\_\_ / \_\_\_ tot \_\_\_ / \_\_\_ / \_\_\_

Reden: \_\_\_\_\_

\_\_\_\_\_

# Maandoverzicht september

| Jaar: _____ | Ik ondervond<br><b>PROBLEMEN</b> | Ik ondervond<br><b>GEEN</b> problemen |
|-------------|----------------------------------|---------------------------------------|
| 1 sep       | <input type="checkbox"/>         | <input type="checkbox"/>              |
| 2 sep       | <input type="checkbox"/>         | <input type="checkbox"/>              |
| 3 sep       | <input type="checkbox"/>         | <input type="checkbox"/>              |
| 4 sep       | <input type="checkbox"/>         | <input type="checkbox"/>              |
| 5 sep       | <input type="checkbox"/>         | <input type="checkbox"/>              |
| 6 sep       | <input type="checkbox"/>         | <input type="checkbox"/>              |
| 7 sep       | <input type="checkbox"/>         | <input type="checkbox"/>              |
| 8 sep       | <input type="checkbox"/>         | <input type="checkbox"/>              |
| 9 sep       | <input type="checkbox"/>         | <input type="checkbox"/>              |
| 10 sep      | <input type="checkbox"/>         | <input type="checkbox"/>              |
| 11 sep      | <input type="checkbox"/>         | <input type="checkbox"/>              |
| 12 sep      | <input type="checkbox"/>         | <input type="checkbox"/>              |
| 13 sep      | <input type="checkbox"/>         | <input type="checkbox"/>              |
| 14 sep      | <input type="checkbox"/>         | <input type="checkbox"/>              |
| 15 sep      | <input type="checkbox"/>         | <input type="checkbox"/>              |
| 16 sep      | <input type="checkbox"/>         | <input type="checkbox"/>              |
| 17 sep      | <input type="checkbox"/>         | <input type="checkbox"/>              |
| 18 sep      | <input type="checkbox"/>         | <input type="checkbox"/>              |
| 19 sep      | <input type="checkbox"/>         | <input type="checkbox"/>              |
| 20 sep      | <input type="checkbox"/>         | <input type="checkbox"/>              |
| 21 sep      | <input type="checkbox"/>         | <input type="checkbox"/>              |
| 22 sep      | <input type="checkbox"/>         | <input type="checkbox"/>              |
| 23 sep      | <input type="checkbox"/>         | <input type="checkbox"/>              |
| 24 sep      | <input type="checkbox"/>         | <input type="checkbox"/>              |
| 25 sep      | <input type="checkbox"/>         | <input type="checkbox"/>              |
| 26 sep      | <input type="checkbox"/>         | <input type="checkbox"/>              |
| 27 sep      | <input type="checkbox"/>         | <input type="checkbox"/>              |
| 28 sep      | <input type="checkbox"/>         | <input type="checkbox"/>              |
| 29 sep      | <input type="checkbox"/>         | <input type="checkbox"/>              |
| 30 sep      | <input type="checkbox"/>         | <input type="checkbox"/>              |

Ik beheerde mijn geneesmiddelen niet zelf van \_\_\_ / \_\_\_ / \_\_\_ tot \_\_\_ / \_\_\_ / \_\_\_

Reden: \_\_\_\_\_

# Maandoverzicht oktober

| Jaar: _____ | Ik ondervond<br><b>PROBLEMEN</b> | Ik ondervond<br><b>GEEN</b> problemen |
|-------------|----------------------------------|---------------------------------------|
| 1 okt       | <input type="checkbox"/>         | <input type="checkbox"/>              |
| 2 okt       | <input type="checkbox"/>         | <input type="checkbox"/>              |
| 3 okt       | <input type="checkbox"/>         | <input type="checkbox"/>              |
| 4 okt       | <input type="checkbox"/>         | <input type="checkbox"/>              |
| 5 okt       | <input type="checkbox"/>         | <input type="checkbox"/>              |
| 6 okt       | <input type="checkbox"/>         | <input type="checkbox"/>              |
| 7 okt       | <input type="checkbox"/>         | <input type="checkbox"/>              |
| 8 okt       | <input type="checkbox"/>         | <input type="checkbox"/>              |
| 9 okt       | <input type="checkbox"/>         | <input type="checkbox"/>              |
| 10 okt      | <input type="checkbox"/>         | <input type="checkbox"/>              |
| 11 okt      | <input type="checkbox"/>         | <input type="checkbox"/>              |
| 12 okt      | <input type="checkbox"/>         | <input type="checkbox"/>              |
| 13 okt      | <input type="checkbox"/>         | <input type="checkbox"/>              |
| 14 okt      | <input type="checkbox"/>         | <input type="checkbox"/>              |
| 15 okt      | <input type="checkbox"/>         | <input type="checkbox"/>              |
| 16 okt      | <input type="checkbox"/>         | <input type="checkbox"/>              |
| 17 okt      | <input type="checkbox"/>         | <input type="checkbox"/>              |
| 18 okt      | <input type="checkbox"/>         | <input type="checkbox"/>              |
| 19 okt      | <input type="checkbox"/>         | <input type="checkbox"/>              |
| 20 okt      | <input type="checkbox"/>         | <input type="checkbox"/>              |
| 21 okt      | <input type="checkbox"/>         | <input type="checkbox"/>              |
| 22 okt      | <input type="checkbox"/>         | <input type="checkbox"/>              |
| 23 okt      | <input type="checkbox"/>         | <input type="checkbox"/>              |
| 24 okt      | <input type="checkbox"/>         | <input type="checkbox"/>              |
| 25 okt      | <input type="checkbox"/>         | <input type="checkbox"/>              |
| 26 okt      | <input type="checkbox"/>         | <input type="checkbox"/>              |
| 27 okt      | <input type="checkbox"/>         | <input type="checkbox"/>              |
| 28 okt      | <input type="checkbox"/>         | <input type="checkbox"/>              |
| 29 okt      | <input type="checkbox"/>         | <input type="checkbox"/>              |
| 30 okt      | <input type="checkbox"/>         | <input type="checkbox"/>              |
| 31 okt      | <input type="checkbox"/>         | <input type="checkbox"/>              |

Ik beheerde mijn geneesmiddelen niet zelf van \_\_\_ / \_\_\_ / \_\_\_ tot \_\_\_ / \_\_\_ / \_\_\_

Reden: \_\_\_\_\_

# Maandoverzicht november

| Jaar: _____ | Ik ondervond<br><b>PROBLEMEN</b> | Ik ondervond<br><b>GEEN</b> problemen |
|-------------|----------------------------------|---------------------------------------|
| 1 nov       | <input type="checkbox"/>         | <input type="checkbox"/>              |
| 2 nov       | <input type="checkbox"/>         | <input type="checkbox"/>              |
| 3 nov       | <input type="checkbox"/>         | <input type="checkbox"/>              |
| 4 nov       | <input type="checkbox"/>         | <input type="checkbox"/>              |
| 5 nov       | <input type="checkbox"/>         | <input type="checkbox"/>              |
| 6 nov       | <input type="checkbox"/>         | <input type="checkbox"/>              |
| 7 nov       | <input type="checkbox"/>         | <input type="checkbox"/>              |
| 8 nov       | <input type="checkbox"/>         | <input type="checkbox"/>              |
| 9 nov       | <input type="checkbox"/>         | <input type="checkbox"/>              |
| 10 nov      | <input type="checkbox"/>         | <input type="checkbox"/>              |
| 11 nov      | <input type="checkbox"/>         | <input type="checkbox"/>              |
| 12 nov      | <input type="checkbox"/>         | <input type="checkbox"/>              |
| 13 nov      | <input type="checkbox"/>         | <input type="checkbox"/>              |
| 14 nov      | <input type="checkbox"/>         | <input type="checkbox"/>              |
| 15 nov      | <input type="checkbox"/>         | <input type="checkbox"/>              |
| 16 nov      | <input type="checkbox"/>         | <input type="checkbox"/>              |
| 17 nov      | <input type="checkbox"/>         | <input type="checkbox"/>              |
| 18 nov      | <input type="checkbox"/>         | <input type="checkbox"/>              |
| 19 nov      | <input type="checkbox"/>         | <input type="checkbox"/>              |
| 20 nov      | <input type="checkbox"/>         | <input type="checkbox"/>              |
| 21 nov      | <input type="checkbox"/>         | <input type="checkbox"/>              |
| 22 nov      | <input type="checkbox"/>         | <input type="checkbox"/>              |
| 23 nov      | <input type="checkbox"/>         | <input type="checkbox"/>              |
| 24 nov      | <input type="checkbox"/>         | <input type="checkbox"/>              |
| 25 nov      | <input type="checkbox"/>         | <input type="checkbox"/>              |
| 26 nov      | <input type="checkbox"/>         | <input type="checkbox"/>              |
| 27 nov      | <input type="checkbox"/>         | <input type="checkbox"/>              |
| 28 nov      | <input type="checkbox"/>         | <input type="checkbox"/>              |
| 29 nov      | <input type="checkbox"/>         | <input type="checkbox"/>              |
| 30 nov      | <input type="checkbox"/>         | <input type="checkbox"/>              |

Ik beheerde mijn geneesmiddelen niet zelf van \_\_\_ / \_\_\_ / \_\_\_ tot \_\_\_ / \_\_\_ / \_\_\_

Reden: \_\_\_\_\_

\_\_\_\_\_

# Maandoverzicht december

| Jaar: _____ | Ik ondervond<br><b>PROBLEMEN</b> | Ik ondervond<br><b>GEEN</b> problemen |
|-------------|----------------------------------|---------------------------------------|
| 1 dec       | <input type="checkbox"/>         | <input type="checkbox"/>              |
| 2 dec       | <input type="checkbox"/>         | <input type="checkbox"/>              |
| 3 dec       | <input type="checkbox"/>         | <input type="checkbox"/>              |
| 4 dec       | <input type="checkbox"/>         | <input type="checkbox"/>              |
| 5 dec       | <input type="checkbox"/>         | <input type="checkbox"/>              |
| 6 dec       | <input type="checkbox"/>         | <input type="checkbox"/>              |
| 7 dec       | <input type="checkbox"/>         | <input type="checkbox"/>              |
| 8 dec       | <input type="checkbox"/>         | <input type="checkbox"/>              |
| 9 dec       | <input type="checkbox"/>         | <input type="checkbox"/>              |
| 10 dec      | <input type="checkbox"/>         | <input type="checkbox"/>              |
| 11 dec      | <input type="checkbox"/>         | <input type="checkbox"/>              |
| 12 dec      | <input type="checkbox"/>         | <input type="checkbox"/>              |
| 13 dec      | <input type="checkbox"/>         | <input type="checkbox"/>              |
| 14 dec      | <input type="checkbox"/>         | <input type="checkbox"/>              |
| 15 dec      | <input type="checkbox"/>         | <input type="checkbox"/>              |
| 16 dec      | <input type="checkbox"/>         | <input type="checkbox"/>              |
| 17 dec      | <input type="checkbox"/>         | <input type="checkbox"/>              |
| 18 dec      | <input type="checkbox"/>         | <input type="checkbox"/>              |
| 19 dec      | <input type="checkbox"/>         | <input type="checkbox"/>              |
| 20 dec      | <input type="checkbox"/>         | <input type="checkbox"/>              |
| 21 dec      | <input type="checkbox"/>         | <input type="checkbox"/>              |
| 22 dec      | <input type="checkbox"/>         | <input type="checkbox"/>              |
| 23 dec      | <input type="checkbox"/>         | <input type="checkbox"/>              |
| 24 dec      | <input type="checkbox"/>         | <input type="checkbox"/>              |
| 25 dec      | <input type="checkbox"/>         | <input type="checkbox"/>              |
| 26 dec      | <input type="checkbox"/>         | <input type="checkbox"/>              |
| 27 dec      | <input type="checkbox"/>         | <input type="checkbox"/>              |
| 28 dec      | <input type="checkbox"/>         | <input type="checkbox"/>              |
| 29 dec      | <input type="checkbox"/>         | <input type="checkbox"/>              |
| 30 dec      | <input type="checkbox"/>         | <input type="checkbox"/>              |
| 31 dec      | <input type="checkbox"/>         | <input type="checkbox"/>              |

Ik beheerde mijn geneesmiddelen niet zelf van \_\_\_ / \_\_\_ / \_\_\_ tot \_\_\_ / \_\_\_ / \_\_\_

Reden: \_\_\_\_\_

\_\_\_\_\_

# Maandoverzicht januari

| Jaar: _____ | Ik ondervond<br><b>PROBLEMEN</b> | Ik ondervond<br><b>GEEN</b> problemen |
|-------------|----------------------------------|---------------------------------------|
| 1 jan       | <input type="checkbox"/>         | <input type="checkbox"/>              |
| 2 jan       | <input type="checkbox"/>         | <input type="checkbox"/>              |
| 3 jan       | <input type="checkbox"/>         | <input type="checkbox"/>              |
| 4 jan       | <input type="checkbox"/>         | <input type="checkbox"/>              |
| 5 jan       | <input type="checkbox"/>         | <input type="checkbox"/>              |
| 6 jan       | <input type="checkbox"/>         | <input type="checkbox"/>              |
| 7 jan       | <input type="checkbox"/>         | <input type="checkbox"/>              |
| 8 jan       | <input type="checkbox"/>         | <input type="checkbox"/>              |
| 9 jan       | <input type="checkbox"/>         | <input type="checkbox"/>              |
| 10 jan      | <input type="checkbox"/>         | <input type="checkbox"/>              |
| 11 jan      | <input type="checkbox"/>         | <input type="checkbox"/>              |
| 12 jan      | <input type="checkbox"/>         | <input type="checkbox"/>              |
| 13 jan      | <input type="checkbox"/>         | <input type="checkbox"/>              |
| 14 jan      | <input type="checkbox"/>         | <input type="checkbox"/>              |
| 15 jan      | <input type="checkbox"/>         | <input type="checkbox"/>              |
| 16 jan      | <input type="checkbox"/>         | <input type="checkbox"/>              |
| 17 jan      | <input type="checkbox"/>         | <input type="checkbox"/>              |
| 18 jan      | <input type="checkbox"/>         | <input type="checkbox"/>              |
| 19 jan      | <input type="checkbox"/>         | <input type="checkbox"/>              |
| 20 jan      | <input type="checkbox"/>         | <input type="checkbox"/>              |
| 21 jan      | <input type="checkbox"/>         | <input type="checkbox"/>              |
| 22 jan      | <input type="checkbox"/>         | <input type="checkbox"/>              |
| 23 jan      | <input type="checkbox"/>         | <input type="checkbox"/>              |
| 24 jan      | <input type="checkbox"/>         | <input type="checkbox"/>              |
| 25 jan      | <input type="checkbox"/>         | <input type="checkbox"/>              |
| 26 jan      | <input type="checkbox"/>         | <input type="checkbox"/>              |
| 27 jan      | <input type="checkbox"/>         | <input type="checkbox"/>              |
| 28 jan      | <input type="checkbox"/>         | <input type="checkbox"/>              |
| 29 jan      | <input type="checkbox"/>         | <input type="checkbox"/>              |
| 30 jan      | <input type="checkbox"/>         | <input type="checkbox"/>              |
| 31 jan      | <input type="checkbox"/>         | <input type="checkbox"/>              |

Ik beheerde mijn geneesmiddelen niet zelf van \_\_\_ / \_\_\_ / \_\_\_ tot \_\_\_ / \_\_\_ / \_\_\_

Reden: \_\_\_\_\_

# Maandoverzicht februari

| Jaar: _____ | Ik ondervond<br><b>PROBLEMEN</b> | Ik ondervond<br><b>GEEN</b> problemen |
|-------------|----------------------------------|---------------------------------------|
| 1 feb       | <input type="checkbox"/>         | <input type="checkbox"/>              |
| 2 feb       | <input type="checkbox"/>         | <input type="checkbox"/>              |
| 3 feb       | <input type="checkbox"/>         | <input type="checkbox"/>              |
| 4 feb       | <input type="checkbox"/>         | <input type="checkbox"/>              |
| 5 feb       | <input type="checkbox"/>         | <input type="checkbox"/>              |
| 6 feb       | <input type="checkbox"/>         | <input type="checkbox"/>              |
| 7 feb       | <input type="checkbox"/>         | <input type="checkbox"/>              |
| 8 feb       | <input type="checkbox"/>         | <input type="checkbox"/>              |
| 9 feb       | <input type="checkbox"/>         | <input type="checkbox"/>              |
| 10 feb      | <input type="checkbox"/>         | <input type="checkbox"/>              |
| 11 feb      | <input type="checkbox"/>         | <input type="checkbox"/>              |
| 12 feb      | <input type="checkbox"/>         | <input type="checkbox"/>              |
| 13 feb      | <input type="checkbox"/>         | <input type="checkbox"/>              |
| 14 feb      | <input type="checkbox"/>         | <input type="checkbox"/>              |
| 15 feb      | <input type="checkbox"/>         | <input type="checkbox"/>              |
| 16 feb      | <input type="checkbox"/>         | <input type="checkbox"/>              |
| 17 feb      | <input type="checkbox"/>         | <input type="checkbox"/>              |
| 18 feb      | <input type="checkbox"/>         | <input type="checkbox"/>              |
| 19 feb      | <input type="checkbox"/>         | <input type="checkbox"/>              |
| 20 feb      | <input type="checkbox"/>         | <input type="checkbox"/>              |
| 21 feb      | <input type="checkbox"/>         | <input type="checkbox"/>              |
| 22 feb      | <input type="checkbox"/>         | <input type="checkbox"/>              |
| 23 feb      | <input type="checkbox"/>         | <input type="checkbox"/>              |
| 24 feb      | <input type="checkbox"/>         | <input type="checkbox"/>              |
| 25 feb      | <input type="checkbox"/>         | <input type="checkbox"/>              |
| 26 feb      | <input type="checkbox"/>         | <input type="checkbox"/>              |
| 27 feb      | <input type="checkbox"/>         | <input type="checkbox"/>              |
| 28 feb      | <input type="checkbox"/>         | <input type="checkbox"/>              |
| [29 feb]    | <input type="checkbox"/>         | <input type="checkbox"/>              |

Ik beheerde mijn geneesmiddelen niet zelf van \_\_\_ / \_\_\_ / \_\_\_ tot \_\_\_ / \_\_\_ / \_\_\_

Reden: \_\_\_\_\_

# Maandoverzicht maart

| Jaar: _____ | Ik ondervond<br><b>PROBLEMEN</b> | Ik ondervond<br><b>GEEN</b> problemen |
|-------------|----------------------------------|---------------------------------------|
| 1 mrt       | <input type="checkbox"/>         | <input type="checkbox"/>              |
| 2 mrt       | <input type="checkbox"/>         | <input type="checkbox"/>              |
| 3 mrt       | <input type="checkbox"/>         | <input type="checkbox"/>              |
| 4 mrt       | <input type="checkbox"/>         | <input type="checkbox"/>              |
| 5 mrt       | <input type="checkbox"/>         | <input type="checkbox"/>              |
| 6 mrt       | <input type="checkbox"/>         | <input type="checkbox"/>              |
| 7 mrt       | <input type="checkbox"/>         | <input type="checkbox"/>              |
| 8 mrt       | <input type="checkbox"/>         | <input type="checkbox"/>              |
| 9 mrt       | <input type="checkbox"/>         | <input type="checkbox"/>              |
| 10 mrt      | <input type="checkbox"/>         | <input type="checkbox"/>              |
| 11 mrt      | <input type="checkbox"/>         | <input type="checkbox"/>              |
| 12 mrt      | <input type="checkbox"/>         | <input type="checkbox"/>              |
| 13 mrt      | <input type="checkbox"/>         | <input type="checkbox"/>              |
| 14 mrt      | <input type="checkbox"/>         | <input type="checkbox"/>              |
| 15 mrt      | <input type="checkbox"/>         | <input type="checkbox"/>              |
| 16 mrt      | <input type="checkbox"/>         | <input type="checkbox"/>              |
| 17 mrt      | <input type="checkbox"/>         | <input type="checkbox"/>              |
| 18 mrt      | <input type="checkbox"/>         | <input type="checkbox"/>              |
| 19 mrt      | <input type="checkbox"/>         | <input type="checkbox"/>              |
| 20 mrt      | <input type="checkbox"/>         | <input type="checkbox"/>              |
| 21 mrt      | <input type="checkbox"/>         | <input type="checkbox"/>              |
| 22 mrt      | <input type="checkbox"/>         | <input type="checkbox"/>              |
| 23 mrt      | <input type="checkbox"/>         | <input type="checkbox"/>              |
| 24 mrt      | <input type="checkbox"/>         | <input type="checkbox"/>              |
| 25 mrt      | <input type="checkbox"/>         | <input type="checkbox"/>              |
| 26 mrt      | <input type="checkbox"/>         | <input type="checkbox"/>              |
| 27 mrt      | <input type="checkbox"/>         | <input type="checkbox"/>              |
| 28 mrt      | <input type="checkbox"/>         | <input type="checkbox"/>              |
| 29 mrt      | <input type="checkbox"/>         | <input type="checkbox"/>              |
| 30 mrt      | <input type="checkbox"/>         | <input type="checkbox"/>              |
| 31 mrt      | <input type="checkbox"/>         | <input type="checkbox"/>              |

Ik beheerde mijn geneesmiddelen niet zelf van \_\_\_ / \_\_\_ / \_\_\_ tot \_\_\_ / \_\_\_ / \_\_\_

Reden: \_\_\_\_\_

\_\_\_\_\_

# Maandoverzicht april

| Jaar: _____ | Ik ondervond<br><b>PROBLEMEN</b> | Ik ondervond<br><b>GEEN</b> problemen |
|-------------|----------------------------------|---------------------------------------|
| 1 apr       | <input type="checkbox"/>         | <input type="checkbox"/>              |
| 2 apr       | <input type="checkbox"/>         | <input type="checkbox"/>              |
| 3 apr       | <input type="checkbox"/>         | <input type="checkbox"/>              |
| 4 apr       | <input type="checkbox"/>         | <input type="checkbox"/>              |
| 5 apr       | <input type="checkbox"/>         | <input type="checkbox"/>              |
| 6 apr       | <input type="checkbox"/>         | <input type="checkbox"/>              |
| 7 apr       | <input type="checkbox"/>         | <input type="checkbox"/>              |
| 8 apr       | <input type="checkbox"/>         | <input type="checkbox"/>              |
| 9 apr       | <input type="checkbox"/>         | <input type="checkbox"/>              |
| 10 apr      | <input type="checkbox"/>         | <input type="checkbox"/>              |
| 11 apr      | <input type="checkbox"/>         | <input type="checkbox"/>              |
| 12 apr      | <input type="checkbox"/>         | <input type="checkbox"/>              |
| 13 apr      | <input type="checkbox"/>         | <input type="checkbox"/>              |
| 14 apr      | <input type="checkbox"/>         | <input type="checkbox"/>              |
| 15 apr      | <input type="checkbox"/>         | <input type="checkbox"/>              |
| 16 apr      | <input type="checkbox"/>         | <input type="checkbox"/>              |
| 17 apr      | <input type="checkbox"/>         | <input type="checkbox"/>              |
| 18 apr      | <input type="checkbox"/>         | <input type="checkbox"/>              |
| 19 apr      | <input type="checkbox"/>         | <input type="checkbox"/>              |
| 20 apr      | <input type="checkbox"/>         | <input type="checkbox"/>              |
| 21 apr      | <input type="checkbox"/>         | <input type="checkbox"/>              |
| 22 apr      | <input type="checkbox"/>         | <input type="checkbox"/>              |
| 23 apr      | <input type="checkbox"/>         | <input type="checkbox"/>              |
| 24 apr      | <input type="checkbox"/>         | <input type="checkbox"/>              |
| 25 apr      | <input type="checkbox"/>         | <input type="checkbox"/>              |
| 26 apr      | <input type="checkbox"/>         | <input type="checkbox"/>              |
| 27 apr      | <input type="checkbox"/>         | <input type="checkbox"/>              |
| 28 apr      | <input type="checkbox"/>         | <input type="checkbox"/>              |
| 29 apr      | <input type="checkbox"/>         | <input type="checkbox"/>              |
| 30 apr      | <input type="checkbox"/>         | <input type="checkbox"/>              |

Ik beheerde mijn geneesmiddelen niet zelf van \_\_\_ / \_\_\_ / \_\_\_ tot \_\_\_ / \_\_\_ / \_\_\_

Reden: \_\_\_\_\_

\_\_\_\_\_

# Maandoverzicht mei

| Jaar: _____ | Ik ondervond<br><b>PROBLEMEN</b> | Ik ondervond<br><b>GEEN</b> problemen |
|-------------|----------------------------------|---------------------------------------|
| 1 mei       | <input type="checkbox"/>         | <input type="checkbox"/>              |
| 2 mei       | <input type="checkbox"/>         | <input type="checkbox"/>              |
| 3 mei       | <input type="checkbox"/>         | <input type="checkbox"/>              |
| 4 mei       | <input type="checkbox"/>         | <input type="checkbox"/>              |
| 5 mei       | <input type="checkbox"/>         | <input type="checkbox"/>              |
| 6 mei       | <input type="checkbox"/>         | <input type="checkbox"/>              |
| 7 mei       | <input type="checkbox"/>         | <input type="checkbox"/>              |
| 8 mei       | <input type="checkbox"/>         | <input type="checkbox"/>              |
| 9 mei       | <input type="checkbox"/>         | <input type="checkbox"/>              |
| 10 mei      | <input type="checkbox"/>         | <input type="checkbox"/>              |
| 11 mei      | <input type="checkbox"/>         | <input type="checkbox"/>              |
| 12 mei      | <input type="checkbox"/>         | <input type="checkbox"/>              |
| 13 mei      | <input type="checkbox"/>         | <input type="checkbox"/>              |
| 14 mei      | <input type="checkbox"/>         | <input type="checkbox"/>              |
| 15 mei      | <input type="checkbox"/>         | <input type="checkbox"/>              |
| 16 mei      | <input type="checkbox"/>         | <input type="checkbox"/>              |
| 17 mei      | <input type="checkbox"/>         | <input type="checkbox"/>              |
| 18 mei      | <input type="checkbox"/>         | <input type="checkbox"/>              |
| 19 mei      | <input type="checkbox"/>         | <input type="checkbox"/>              |
| 20 mei      | <input type="checkbox"/>         | <input type="checkbox"/>              |
| 21 mei      | <input type="checkbox"/>         | <input type="checkbox"/>              |
| 22 mei      | <input type="checkbox"/>         | <input type="checkbox"/>              |
| 23 mei      | <input type="checkbox"/>         | <input type="checkbox"/>              |
| 24 mei      | <input type="checkbox"/>         | <input type="checkbox"/>              |
| 25 mei      | <input type="checkbox"/>         | <input type="checkbox"/>              |
| 26 mei      | <input type="checkbox"/>         | <input type="checkbox"/>              |
| 27 mei      | <input type="checkbox"/>         | <input type="checkbox"/>              |
| 28 mei      | <input type="checkbox"/>         | <input type="checkbox"/>              |
| 29 mei      | <input type="checkbox"/>         | <input type="checkbox"/>              |
| 30 mei      | <input type="checkbox"/>         | <input type="checkbox"/>              |
| 31 mei      | <input type="checkbox"/>         | <input type="checkbox"/>              |

Ik beheerde mijn geneesmiddelen niet zelf van \_\_\_ / \_\_\_ / \_\_\_ tot \_\_\_ / \_\_\_ / \_\_\_

Reden: \_\_\_\_\_

\_\_\_\_\_

# Maandoverzicht juni

| Jaar: _____ | Ik ondervond<br><b>PROBLEMEN</b> | Ik ondervond<br><b>GEEN</b> problemen |
|-------------|----------------------------------|---------------------------------------|
| 1 juni      | <input type="checkbox"/>         | <input type="checkbox"/>              |
| 2 juni      | <input type="checkbox"/>         | <input type="checkbox"/>              |
| 3 juni      | <input type="checkbox"/>         | <input type="checkbox"/>              |
| 4 juni      | <input type="checkbox"/>         | <input type="checkbox"/>              |
| 5 juni      | <input type="checkbox"/>         | <input type="checkbox"/>              |
| 6 juni      | <input type="checkbox"/>         | <input type="checkbox"/>              |
| 7 juni      | <input type="checkbox"/>         | <input type="checkbox"/>              |
| 8 juni      | <input type="checkbox"/>         | <input type="checkbox"/>              |
| 9 juni      | <input type="checkbox"/>         | <input type="checkbox"/>              |
| 10 juni     | <input type="checkbox"/>         | <input type="checkbox"/>              |
| 11 juni     | <input type="checkbox"/>         | <input type="checkbox"/>              |
| 12 juni     | <input type="checkbox"/>         | <input type="checkbox"/>              |
| 13 juni     | <input type="checkbox"/>         | <input type="checkbox"/>              |
| 14 juni     | <input type="checkbox"/>         | <input type="checkbox"/>              |
| 15 juni     | <input type="checkbox"/>         | <input type="checkbox"/>              |
| 16 juni     | <input type="checkbox"/>         | <input type="checkbox"/>              |
| 17 juni     | <input type="checkbox"/>         | <input type="checkbox"/>              |
| 18 juni     | <input type="checkbox"/>         | <input type="checkbox"/>              |
| 19 juni     | <input type="checkbox"/>         | <input type="checkbox"/>              |
| 20 juni     | <input type="checkbox"/>         | <input type="checkbox"/>              |
| 21 juni     | <input type="checkbox"/>         | <input type="checkbox"/>              |
| 22 juni     | <input type="checkbox"/>         | <input type="checkbox"/>              |
| 23 juni     | <input type="checkbox"/>         | <input type="checkbox"/>              |
| 24 juni     | <input type="checkbox"/>         | <input type="checkbox"/>              |
| 25 juni     | <input type="checkbox"/>         | <input type="checkbox"/>              |
| 26 juni     | <input type="checkbox"/>         | <input type="checkbox"/>              |
| 27 juni     | <input type="checkbox"/>         | <input type="checkbox"/>              |
| 28 juni     | <input type="checkbox"/>         | <input type="checkbox"/>              |
| 29 juni     | <input type="checkbox"/>         | <input type="checkbox"/>              |
| 30 juni     | <input type="checkbox"/>         | <input type="checkbox"/>              |

Ik beheerde mijn geneesmiddelen niet zelf van \_\_\_ / \_\_\_ / \_\_\_ tot \_\_\_ / \_\_\_ / \_\_\_

Reden: \_\_\_\_\_

\_\_\_\_\_

# Maandoverzicht juli

| Jaar: _____ | Ik ondervond<br><b>PROBLEMEN</b> | Ik ondervond<br><b>GEEN</b> problemen |
|-------------|----------------------------------|---------------------------------------|
| 1 juli      | <input type="checkbox"/>         | <input type="checkbox"/>              |
| 2 juli      | <input type="checkbox"/>         | <input type="checkbox"/>              |
| 3 juli      | <input type="checkbox"/>         | <input type="checkbox"/>              |
| 4 juli      | <input type="checkbox"/>         | <input type="checkbox"/>              |
| 5 juli      | <input type="checkbox"/>         | <input type="checkbox"/>              |
| 6 juli      | <input type="checkbox"/>         | <input type="checkbox"/>              |
| 7 juli      | <input type="checkbox"/>         | <input type="checkbox"/>              |
| 8 juli      | <input type="checkbox"/>         | <input type="checkbox"/>              |
| 9 juli      | <input type="checkbox"/>         | <input type="checkbox"/>              |
| 10 juli     | <input type="checkbox"/>         | <input type="checkbox"/>              |
| 11 juli     | <input type="checkbox"/>         | <input type="checkbox"/>              |
| 12 juli     | <input type="checkbox"/>         | <input type="checkbox"/>              |
| 13 juli     | <input type="checkbox"/>         | <input type="checkbox"/>              |
| 14 juli     | <input type="checkbox"/>         | <input type="checkbox"/>              |
| 15 juli     | <input type="checkbox"/>         | <input type="checkbox"/>              |
| 16 juli     | <input type="checkbox"/>         | <input type="checkbox"/>              |
| 17 juli     | <input type="checkbox"/>         | <input type="checkbox"/>              |
| 18 juli     | <input type="checkbox"/>         | <input type="checkbox"/>              |
| 19 juli     | <input type="checkbox"/>         | <input type="checkbox"/>              |
| 20 juli     | <input type="checkbox"/>         | <input type="checkbox"/>              |
| 21 juli     | <input type="checkbox"/>         | <input type="checkbox"/>              |
| 22 juli     | <input type="checkbox"/>         | <input type="checkbox"/>              |
| 23 juli     | <input type="checkbox"/>         | <input type="checkbox"/>              |
| 24 juli     | <input type="checkbox"/>         | <input type="checkbox"/>              |
| 25 juli     | <input type="checkbox"/>         | <input type="checkbox"/>              |
| 26 juli     | <input type="checkbox"/>         | <input type="checkbox"/>              |
| 27 juli     | <input type="checkbox"/>         | <input type="checkbox"/>              |
| 28 juli     | <input type="checkbox"/>         | <input type="checkbox"/>              |
| 29 juli     | <input type="checkbox"/>         | <input type="checkbox"/>              |
| 30 juli     | <input type="checkbox"/>         | <input type="checkbox"/>              |
| 31 juli     | <input type="checkbox"/>         | <input type="checkbox"/>              |

Ik beheerde mijn geneesmiddelen niet zelf van \_\_\_ / \_\_\_ / \_\_\_ tot \_\_\_ / \_\_\_ / \_\_\_

Reden: \_\_\_\_\_

\_\_\_\_\_

# Maandoverzicht augustus

| Jaar: _____ | Ik ondervond<br><b>PROBLEMEN</b> | Ik ondervond<br><b>GEEN</b> problemen |
|-------------|----------------------------------|---------------------------------------|
| 1 aug       | <input type="checkbox"/>         | <input type="checkbox"/>              |
| 2 aug       | <input type="checkbox"/>         | <input type="checkbox"/>              |
| 3 aug       | <input type="checkbox"/>         | <input type="checkbox"/>              |
| 4 aug       | <input type="checkbox"/>         | <input type="checkbox"/>              |
| 5 aug       | <input type="checkbox"/>         | <input type="checkbox"/>              |
| 6 aug       | <input type="checkbox"/>         | <input type="checkbox"/>              |
| 7 aug       | <input type="checkbox"/>         | <input type="checkbox"/>              |
| 8 aug       | <input type="checkbox"/>         | <input type="checkbox"/>              |
| 9 aug       | <input type="checkbox"/>         | <input type="checkbox"/>              |
| 10 aug      | <input type="checkbox"/>         | <input type="checkbox"/>              |
| 11 aug      | <input type="checkbox"/>         | <input type="checkbox"/>              |
| 12 aug      | <input type="checkbox"/>         | <input type="checkbox"/>              |
| 13 aug      | <input type="checkbox"/>         | <input type="checkbox"/>              |
| 14 aug      | <input type="checkbox"/>         | <input type="checkbox"/>              |
| 15 aug      | <input type="checkbox"/>         | <input type="checkbox"/>              |
| 16 aug      | <input type="checkbox"/>         | <input type="checkbox"/>              |
| 17 aug      | <input type="checkbox"/>         | <input type="checkbox"/>              |
| 18 aug      | <input type="checkbox"/>         | <input type="checkbox"/>              |
| 19 aug      | <input type="checkbox"/>         | <input type="checkbox"/>              |
| 20 aug      | <input type="checkbox"/>         | <input type="checkbox"/>              |
| 21 aug      | <input type="checkbox"/>         | <input type="checkbox"/>              |
| 22 aug      | <input type="checkbox"/>         | <input type="checkbox"/>              |
| 23 aug      | <input type="checkbox"/>         | <input type="checkbox"/>              |
| 24 aug      | <input type="checkbox"/>         | <input type="checkbox"/>              |
| 25 aug      | <input type="checkbox"/>         | <input type="checkbox"/>              |
| 26 aug      | <input type="checkbox"/>         | <input type="checkbox"/>              |
| 27 aug      | <input type="checkbox"/>         | <input type="checkbox"/>              |
| 28 aug      | <input type="checkbox"/>         | <input type="checkbox"/>              |
| 29 aug      | <input type="checkbox"/>         | <input type="checkbox"/>              |
| 30 aug      | <input type="checkbox"/>         | <input type="checkbox"/>              |
| 31 aug      | <input type="checkbox"/>         | <input type="checkbox"/>              |

Ik beheerde mijn geneesmiddelen niet zelf van \_\_\_ / \_\_\_ / \_\_\_ tot \_\_\_ / \_\_\_ / \_\_\_

Reden: \_\_\_\_\_

\_\_\_\_\_



# Maandoverzicht september

| Jaar: _____ | Ik ondervond<br><b>PROBLEMEN</b> | Ik ondervond<br><b>GEEN</b> problemen |
|-------------|----------------------------------|---------------------------------------|
| 1 sep       | <input type="checkbox"/>         | <input type="checkbox"/>              |
| 2 sep       | <input type="checkbox"/>         | <input type="checkbox"/>              |
| 3 sep       | <input type="checkbox"/>         | <input type="checkbox"/>              |
| 4 sep       | <input type="checkbox"/>         | <input type="checkbox"/>              |
| 5 sep       | <input type="checkbox"/>         | <input type="checkbox"/>              |
| 6 sep       | <input type="checkbox"/>         | <input type="checkbox"/>              |
| 7 sep       | <input type="checkbox"/>         | <input type="checkbox"/>              |
| 8 sep       | <input type="checkbox"/>         | <input type="checkbox"/>              |
| 9 sep       | <input type="checkbox"/>         | <input type="checkbox"/>              |
| 10 sep      | <input type="checkbox"/>         | <input type="checkbox"/>              |
| 11 sep      | <input type="checkbox"/>         | <input type="checkbox"/>              |
| 12 sep      | <input type="checkbox"/>         | <input type="checkbox"/>              |
| 13 sep      | <input type="checkbox"/>         | <input type="checkbox"/>              |
| 14 sep      | <input type="checkbox"/>         | <input type="checkbox"/>              |
| 15 sep      | <input type="checkbox"/>         | <input type="checkbox"/>              |
| 16 sep      | <input type="checkbox"/>         | <input type="checkbox"/>              |
| 17 sep      | <input type="checkbox"/>         | <input type="checkbox"/>              |
| 18 sep      | <input type="checkbox"/>         | <input type="checkbox"/>              |
| 19 sep      | <input type="checkbox"/>         | <input type="checkbox"/>              |
| 20 sep      | <input type="checkbox"/>         | <input type="checkbox"/>              |
| 21 sep      | <input type="checkbox"/>         | <input type="checkbox"/>              |
| 22 sep      | <input type="checkbox"/>         | <input type="checkbox"/>              |
| 23 sep      | <input type="checkbox"/>         | <input type="checkbox"/>              |
| 24 sep      | <input type="checkbox"/>         | <input type="checkbox"/>              |
| 25 sep      | <input type="checkbox"/>         | <input type="checkbox"/>              |
| 26 sep      | <input type="checkbox"/>         | <input type="checkbox"/>              |
| 27 sep      | <input type="checkbox"/>         | <input type="checkbox"/>              |
| 28 sep      | <input type="checkbox"/>         | <input type="checkbox"/>              |
| 29 sep      | <input type="checkbox"/>         | <input type="checkbox"/>              |
| 30 sep      | <input type="checkbox"/>         | <input type="checkbox"/>              |

Ik beheerde mijn geneesmiddelen niet zelf van \_\_\_ / \_\_\_ / \_\_\_ tot \_\_\_ / \_\_\_ / \_\_\_

Reden: \_\_\_\_\_

\_\_\_\_\_

# Maandoverzicht oktober

| Jaar: _____ | Ik ondervond<br><b>PROBLEMEN</b> | Ik ondervond<br><b>GEEN</b> problemen |
|-------------|----------------------------------|---------------------------------------|
| 1 okt       | <input type="checkbox"/>         | <input type="checkbox"/>              |
| 2 okt       | <input type="checkbox"/>         | <input type="checkbox"/>              |
| 3 okt       | <input type="checkbox"/>         | <input type="checkbox"/>              |
| 4 okt       | <input type="checkbox"/>         | <input type="checkbox"/>              |
| 5 okt       | <input type="checkbox"/>         | <input type="checkbox"/>              |
| 6 okt       | <input type="checkbox"/>         | <input type="checkbox"/>              |
| 7 okt       | <input type="checkbox"/>         | <input type="checkbox"/>              |
| 8 okt       | <input type="checkbox"/>         | <input type="checkbox"/>              |
| 9 okt       | <input type="checkbox"/>         | <input type="checkbox"/>              |
| 10 okt      | <input type="checkbox"/>         | <input type="checkbox"/>              |
| 11 okt      | <input type="checkbox"/>         | <input type="checkbox"/>              |
| 12 okt      | <input type="checkbox"/>         | <input type="checkbox"/>              |
| 13 okt      | <input type="checkbox"/>         | <input type="checkbox"/>              |
| 14 okt      | <input type="checkbox"/>         | <input type="checkbox"/>              |
| 15 okt      | <input type="checkbox"/>         | <input type="checkbox"/>              |
| 16 okt      | <input type="checkbox"/>         | <input type="checkbox"/>              |
| 17 okt      | <input type="checkbox"/>         | <input type="checkbox"/>              |
| 18 okt      | <input type="checkbox"/>         | <input type="checkbox"/>              |
| 19 okt      | <input type="checkbox"/>         | <input type="checkbox"/>              |
| 20 okt      | <input type="checkbox"/>         | <input type="checkbox"/>              |
| 21 okt      | <input type="checkbox"/>         | <input type="checkbox"/>              |
| 22 okt      | <input type="checkbox"/>         | <input type="checkbox"/>              |
| 23 okt      | <input type="checkbox"/>         | <input type="checkbox"/>              |
| 24 okt      | <input type="checkbox"/>         | <input type="checkbox"/>              |
| 25 okt      | <input type="checkbox"/>         | <input type="checkbox"/>              |
| 26 okt      | <input type="checkbox"/>         | <input type="checkbox"/>              |
| 27 okt      | <input type="checkbox"/>         | <input type="checkbox"/>              |
| 28 okt      | <input type="checkbox"/>         | <input type="checkbox"/>              |
| 29 okt      | <input type="checkbox"/>         | <input type="checkbox"/>              |
| 30 okt      | <input type="checkbox"/>         | <input type="checkbox"/>              |
| 31 okt      | <input type="checkbox"/>         | <input type="checkbox"/>              |

Ik beheerde mijn geneesmiddelen niet zelf van \_\_\_ / \_\_\_ / \_\_\_ tot \_\_\_ / \_\_\_ / \_\_\_

Reden: \_\_\_\_\_

\_\_\_\_\_

# Maandoverzicht november

| Jaar: _____ | Ik ondervond<br><b>PROBLEMEN</b> | Ik ondervond<br><b>GEEN</b> problemen |
|-------------|----------------------------------|---------------------------------------|
| 1 nov       | <input type="checkbox"/>         | <input type="checkbox"/>              |
| 2 nov       | <input type="checkbox"/>         | <input type="checkbox"/>              |
| 3 nov       | <input type="checkbox"/>         | <input type="checkbox"/>              |
| 4 nov       | <input type="checkbox"/>         | <input type="checkbox"/>              |
| 5 nov       | <input type="checkbox"/>         | <input type="checkbox"/>              |
| 6 nov       | <input type="checkbox"/>         | <input type="checkbox"/>              |
| 7 nov       | <input type="checkbox"/>         | <input type="checkbox"/>              |
| 8 nov       | <input type="checkbox"/>         | <input type="checkbox"/>              |
| 9 nov       | <input type="checkbox"/>         | <input type="checkbox"/>              |
| 10 nov      | <input type="checkbox"/>         | <input type="checkbox"/>              |
| 11 nov      | <input type="checkbox"/>         | <input type="checkbox"/>              |
| 12 nov      | <input type="checkbox"/>         | <input type="checkbox"/>              |
| 13 nov      | <input type="checkbox"/>         | <input type="checkbox"/>              |
| 14 nov      | <input type="checkbox"/>         | <input type="checkbox"/>              |
| 15 nov      | <input type="checkbox"/>         | <input type="checkbox"/>              |
| 16 nov      | <input type="checkbox"/>         | <input type="checkbox"/>              |
| 17 nov      | <input type="checkbox"/>         | <input type="checkbox"/>              |
| 18 nov      | <input type="checkbox"/>         | <input type="checkbox"/>              |
| 19 nov      | <input type="checkbox"/>         | <input type="checkbox"/>              |
| 20 nov      | <input type="checkbox"/>         | <input type="checkbox"/>              |
| 21 nov      | <input type="checkbox"/>         | <input type="checkbox"/>              |
| 22 nov      | <input type="checkbox"/>         | <input type="checkbox"/>              |
| 23 nov      | <input type="checkbox"/>         | <input type="checkbox"/>              |
| 24 nov      | <input type="checkbox"/>         | <input type="checkbox"/>              |
| 25 nov      | <input type="checkbox"/>         | <input type="checkbox"/>              |
| 26 nov      | <input type="checkbox"/>         | <input type="checkbox"/>              |
| 27 nov      | <input type="checkbox"/>         | <input type="checkbox"/>              |
| 28 nov      | <input type="checkbox"/>         | <input type="checkbox"/>              |
| 29 nov      | <input type="checkbox"/>         | <input type="checkbox"/>              |
| 30 nov      | <input type="checkbox"/>         | <input type="checkbox"/>              |

Ik beheerde mijn geneesmiddelen niet zelf van \_\_\_ / \_\_\_ / \_\_\_ tot \_\_\_ / \_\_\_ / \_\_\_

Reden: \_\_\_\_\_

\_\_\_\_\_

# Maandoverzicht december

| Jaar: _____ | Ik ondervond<br><b>PROBLEMEN</b> | Ik ondervond<br><b>GEEN</b> problemen |
|-------------|----------------------------------|---------------------------------------|
| 1 dec       | <input type="checkbox"/>         | <input type="checkbox"/>              |
| 2 dec       | <input type="checkbox"/>         | <input type="checkbox"/>              |
| 3 dec       | <input type="checkbox"/>         | <input type="checkbox"/>              |
| 4 dec       | <input type="checkbox"/>         | <input type="checkbox"/>              |
| 5 dec       | <input type="checkbox"/>         | <input type="checkbox"/>              |
| 6 dec       | <input type="checkbox"/>         | <input type="checkbox"/>              |
| 7 dec       | <input type="checkbox"/>         | <input type="checkbox"/>              |
| 8 dec       | <input type="checkbox"/>         | <input type="checkbox"/>              |
| 9 dec       | <input type="checkbox"/>         | <input type="checkbox"/>              |
| 10 dec      | <input type="checkbox"/>         | <input type="checkbox"/>              |
| 11 dec      | <input type="checkbox"/>         | <input type="checkbox"/>              |
| 12 dec      | <input type="checkbox"/>         | <input type="checkbox"/>              |
| 13 dec      | <input type="checkbox"/>         | <input type="checkbox"/>              |
| 14 dec      | <input type="checkbox"/>         | <input type="checkbox"/>              |
| 15 dec      | <input type="checkbox"/>         | <input type="checkbox"/>              |
| 16 dec      | <input type="checkbox"/>         | <input type="checkbox"/>              |
| 17 dec      | <input type="checkbox"/>         | <input type="checkbox"/>              |
| 18 dec      | <input type="checkbox"/>         | <input type="checkbox"/>              |
| 19 dec      | <input type="checkbox"/>         | <input type="checkbox"/>              |
| 20 dec      | <input type="checkbox"/>         | <input type="checkbox"/>              |
| 21 dec      | <input type="checkbox"/>         | <input type="checkbox"/>              |
| 22 dec      | <input type="checkbox"/>         | <input type="checkbox"/>              |
| 23 dec      | <input type="checkbox"/>         | <input type="checkbox"/>              |
| 24 dec      | <input type="checkbox"/>         | <input type="checkbox"/>              |
| 25 dec      | <input type="checkbox"/>         | <input type="checkbox"/>              |
| 26 dec      | <input type="checkbox"/>         | <input type="checkbox"/>              |
| 27 dec      | <input type="checkbox"/>         | <input type="checkbox"/>              |
| 28 dec      | <input type="checkbox"/>         | <input type="checkbox"/>              |
| 29 dec      | <input type="checkbox"/>         | <input type="checkbox"/>              |
| 30 dec      | <input type="checkbox"/>         | <input type="checkbox"/>              |
| 31 dec      | <input type="checkbox"/>         | <input type="checkbox"/>              |

Ik beheerde mijn geneesmiddelen niet zelf van \_\_\_ / \_\_\_ / \_\_\_ tot \_\_\_ / \_\_\_ / \_\_\_

Reden: \_\_\_\_\_

\_\_\_\_\_

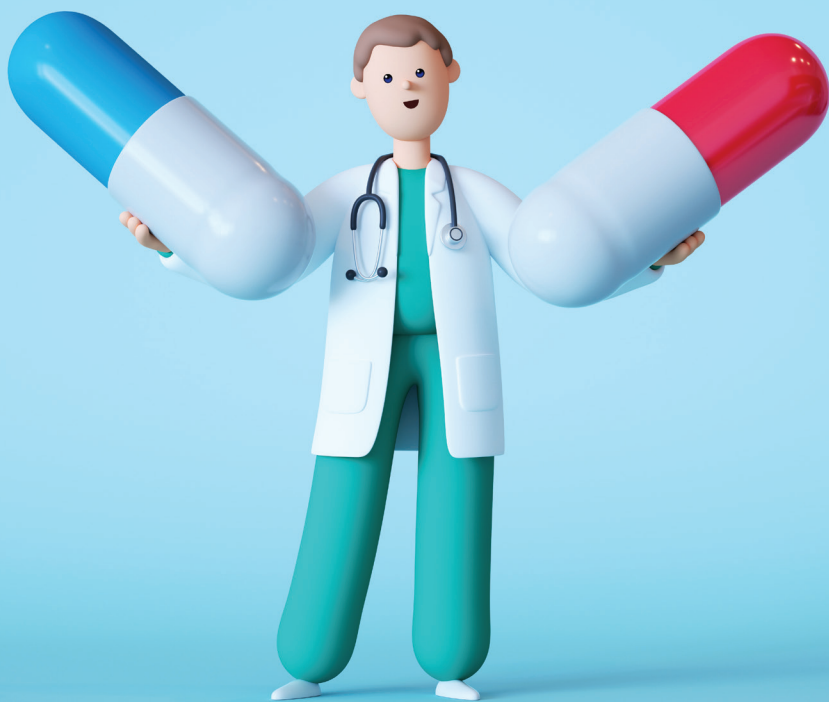

## Probleemfiches

- U moet enkel en alleen een probleemfiche invullen indien u op een bepaalde dag of gedurende een bepaalde periode een probleem met uw geneesmiddelen ondervond. Indien u geen problemen ondervond, vult u geen probleemfiche in.
- Noteer bovenaan steeds de datum van de dag waarop u problemen ondervond (voorbeeld: 1/01/2021) of indien de problemen langere tijd aanhouden kan u ook een periode invullen (voorbeeld 1/01/2021 tot 14/01/2021).
- Kruis aan welke problemen u concreet ondervond en voor welke geneesmiddelen.
- Noteer of u bepaalde acties ondernam (voorbeeld: arts, thuisverpleegkundige, apotheker,... contacteren).

# Probleemfiche

Datum van invullen: \_\_\_\_/\_\_\_\_/\_\_\_\_

| Datum: ____/____/____ of periode vanaf ____/____/____ tot ____/____/____                                                        |                                                         |                                       |
|---------------------------------------------------------------------------------------------------------------------------------|---------------------------------------------------------|---------------------------------------|
| Welk probleem ondervond u?                                                                                                      | Bij welk geneesmiddel?                                  | Heeft u actie ondernomen?             |
| <b>a. Problemen met aankoop</b>                                                                                                 |                                                         |                                       |
| <input type="checkbox"/> Geneesmiddelen niet in voorraad                                                                        | <input type="checkbox"/> Bij alle geneesmiddelen        | <input type="checkbox"/> Neen         |
| <input type="checkbox"/> Vergeten te halen bij de apotheek                                                                      | <input type="checkbox"/> Bij specifieke geneesmiddelen: | <input type="checkbox"/> Ja, namelijk |
| <input type="checkbox"/> Ik kan mijn geneesmiddelen niet verkrijgen (niet mogelijk om zelf te halen, geen hulp van anderen,...) | _____                                                   | _____                                 |
| <input type="checkbox"/> Ik kan de geneesmiddelen niet betalen                                                                  | <input type="checkbox"/> Ik weet het niet               | _____                                 |
| <input type="checkbox"/> Ik had geen (vervolg)voorschrift                                                                       | _____                                                   | _____                                 |
| <b>b. Nevenwerkingen</b>                                                                                                        |                                                         |                                       |
|                                                                                                                                 | <input type="checkbox"/> Bij alle geneesmiddelen        | <input type="checkbox"/> Neen         |
|                                                                                                                                 | <input type="checkbox"/> Bij specifieke geneesmiddelen: | <input type="checkbox"/> Ja, namelijk |
|                                                                                                                                 | _____                                                   | _____                                 |
|                                                                                                                                 | <input type="checkbox"/> Ik weet het niet               | _____                                 |
|                                                                                                                                 | _____                                                   | _____                                 |

| Welk probleem ondervond u?                              | Bij welk geneesmiddel?                                  | Heeft u actie ondernomen?             |
|---------------------------------------------------------|---------------------------------------------------------|---------------------------------------|
| <b>c. Problemen met geneesmiddelengebruik</b>           |                                                         |                                       |
| <input type="checkbox"/> Ik nam een verkeerde dosis     | <input type="checkbox"/> Bij alle geneesmiddelen        | <input type="checkbox"/> Neen         |
| <input type="checkbox"/> Meer dan voorgeschreven        | <input type="checkbox"/> Bij specifieke geneesmiddelen: | <input type="checkbox"/> Ja, namelijk |
| <input type="checkbox"/> Minder dan voorgeschreven      | _____                                                   | _____                                 |
| <input type="checkbox"/> Andere: _____                  | _____                                                   | _____                                 |
|                                                         | <input type="checkbox"/> Ik weet het niet               | _____                                 |
| <input type="checkbox"/> Op verkeerd tijdstip ingenomen | <input type="checkbox"/> Bij alle geneesmiddelen        | <input type="checkbox"/> Neen         |
| <input type="checkbox"/> Te vroeg/te snel               | <input type="checkbox"/> Bij specifieke geneesmiddelen: | <input type="checkbox"/> Ja, namelijk |
| <input type="checkbox"/> Te laat                        | _____                                                   | _____                                 |
| <input type="checkbox"/> Andere: _____                  | _____                                                   | _____                                 |
|                                                         | <input type="checkbox"/> Ik weet het niet               | _____                                 |
| <input type="checkbox"/> Op de foute manier ingenomen   | <input type="checkbox"/> Bij alle geneesmiddelen        | <input type="checkbox"/> Neen         |
|                                                         | <input type="checkbox"/> Bij specifieke geneesmiddelen: | <input type="checkbox"/> Ja, namelijk |
|                                                         | _____                                                   | _____                                 |
|                                                         | <input type="checkbox"/> Ik weet het niet               | _____                                 |
|                                                         | _____                                                   | _____                                 |

| Welk probleem ondervond u?                                                                                              | Bij welk geneesmiddel?                                                                                                                                       | Heeft u actie ondernomen?                                                              |
|-------------------------------------------------------------------------------------------------------------------------|--------------------------------------------------------------------------------------------------------------------------------------------------------------|----------------------------------------------------------------------------------------|
| <input type="checkbox"/> Vergeten in te nemen                                                                           | <input type="checkbox"/> Bij alle geneesmiddelen<br><input type="checkbox"/> Bij specifieke geneesmiddelen:<br><br><input type="checkbox"/> Ik weet het niet | <input type="checkbox"/> Neen<br><input type="checkbox"/> Ja, namelijk<br><br><br><br> |
| <input type="checkbox"/> Problemen met toedienen van geneesmiddelen (slikproblemen, inhaleren, insmeren, inspuiten,...) | <input type="checkbox"/> Bij alle geneesmiddelen<br><input type="checkbox"/> Bij specifieke geneesmiddelen:<br><br><input type="checkbox"/> Ik weet het niet | <input type="checkbox"/> Neen<br><input type="checkbox"/> Ja, namelijk<br><br><br><br> |
| <b>d. Problemen met verpakkingen</b>                                                                                    |                                                                                                                                                              |                                                                                        |
| <input type="checkbox"/> Moeilijkheden met openen van de verpakking.                                                    | <input type="checkbox"/> Bij alle geneesmiddelen<br><input type="checkbox"/> Bij specifieke geneesmiddelen:<br><br><input type="checkbox"/> Ik weet het niet | <input type="checkbox"/> Neen<br><input type="checkbox"/> Ja, namelijk<br><br><br><br> |

| Welk probleem ondervond u?                                                                       | Bij welk geneesmiddel?                                                                                                                                       | Heeft u actie ondernomen?                                                              |
|--------------------------------------------------------------------------------------------------|--------------------------------------------------------------------------------------------------------------------------------------------------------------|----------------------------------------------------------------------------------------|
| <input type="checkbox"/> Moeilijkheden met bewaren (vb. verpakking weggegooid)                   | <input type="checkbox"/> Bij alle geneesmiddelen<br><input type="checkbox"/> Bij specifieke geneesmiddelen:<br><br><input type="checkbox"/> Ik weet het niet | <input type="checkbox"/> Neen<br><input type="checkbox"/> Ja, namelijk<br><br><br><br> |
| <input type="checkbox"/> Ik kan niet alle informatie over mijn geneesmiddelen lezen of begrijpen | <input type="checkbox"/> Bij alle geneesmiddelen<br><input type="checkbox"/> Bij specifieke geneesmiddelen:<br><br><input type="checkbox"/> Ik weet het niet | <input type="checkbox"/> Neen<br><input type="checkbox"/> Ja, namelijk<br><br><br><br> |
| <b>e. Andere problemen</b>                                                                       |                                                                                                                                                              |                                                                                        |
| <br><br><br><br>                                                                                 | <input type="checkbox"/> Bij alle geneesmiddelen<br><input type="checkbox"/> Bij specifieke geneesmiddelen:<br><br><input type="checkbox"/> Ik weet het niet | <input type="checkbox"/> Neen<br><input type="checkbox"/> Ja, namelijk<br><br><br><br> |

# Probleemfiche

Datum van invullen: \_\_\_\_/\_\_\_\_/\_\_\_\_

| Datum: ____/____/____ of periode vanaf ____/____/____ tot ____/____/____                                                        |                                                         |                                       |
|---------------------------------------------------------------------------------------------------------------------------------|---------------------------------------------------------|---------------------------------------|
| Welk probleem ondervond u?                                                                                                      | Bij welk geneesmiddel?                                  | Heeft u actie ondernomen?             |
| <b>a. Problemen met aankoop</b>                                                                                                 |                                                         |                                       |
| <input type="checkbox"/> Geneesmiddelen niet in voorraad                                                                        | <input type="checkbox"/> Bij alle geneesmiddelen        | <input type="checkbox"/> Neen         |
| <input type="checkbox"/> Vergeten te halen bij de apotheek                                                                      | <input type="checkbox"/> Bij specifieke geneesmiddelen: | <input type="checkbox"/> Ja, namelijk |
| <input type="checkbox"/> Ik kan mijn geneesmiddelen niet verkrijgen (niet mogelijk om zelf te halen, geen hulp van anderen,...) | _____                                                   | _____                                 |
| <input type="checkbox"/> Ik kan de geneesmiddelen niet betalen                                                                  | <input type="checkbox"/> Ik weet het niet               | _____                                 |
| <input type="checkbox"/> Ik had geen (vervolg)voorschrift                                                                       | _____                                                   | _____                                 |
| <b>b. Nevenwerkingen</b>                                                                                                        |                                                         |                                       |
|                                                                                                                                 | <input type="checkbox"/> Bij alle geneesmiddelen        | <input type="checkbox"/> Neen         |
|                                                                                                                                 | <input type="checkbox"/> Bij specifieke geneesmiddelen: | <input type="checkbox"/> Ja, namelijk |
|                                                                                                                                 | _____                                                   | _____                                 |
|                                                                                                                                 | <input type="checkbox"/> Ik weet het niet               | _____                                 |
|                                                                                                                                 | _____                                                   | _____                                 |

| Welk probleem ondervond u?                              | Bij welk geneesmiddel?                                  | Heeft u actie ondernomen?             |
|---------------------------------------------------------|---------------------------------------------------------|---------------------------------------|
| <b>c. Problemen met geneesmiddelengebruik</b>           |                                                         |                                       |
| <input type="checkbox"/> Ik nam een verkeerde dosis     | <input type="checkbox"/> Bij alle geneesmiddelen        | <input type="checkbox"/> Neen         |
| <input type="checkbox"/> Meer dan voorgeschreven        | <input type="checkbox"/> Bij specifieke geneesmiddelen: | <input type="checkbox"/> Ja, namelijk |
| <input type="checkbox"/> Minder dan voorgeschreven      | _____                                                   | _____                                 |
| <input type="checkbox"/> Andere: _____                  | _____                                                   | _____                                 |
|                                                         | <input type="checkbox"/> Ik weet het niet               | _____                                 |
| <input type="checkbox"/> Op verkeerd tijdstip ingenomen | <input type="checkbox"/> Bij alle geneesmiddelen        | <input type="checkbox"/> Neen         |
| <input type="checkbox"/> Te vroeg/te snel               | <input type="checkbox"/> Bij specifieke geneesmiddelen: | <input type="checkbox"/> Ja, namelijk |
| <input type="checkbox"/> Te laat                        | _____                                                   | _____                                 |
| <input type="checkbox"/> Andere: _____                  | _____                                                   | _____                                 |
|                                                         | <input type="checkbox"/> Ik weet het niet               | _____                                 |
| <input type="checkbox"/> Op de foute manier ingenomen   | <input type="checkbox"/> Bij alle geneesmiddelen        | <input type="checkbox"/> Neen         |
|                                                         | <input type="checkbox"/> Bij specifieke geneesmiddelen: | <input type="checkbox"/> Ja, namelijk |
|                                                         | _____                                                   | _____                                 |
|                                                         | <input type="checkbox"/> Ik weet het niet               | _____                                 |
|                                                         | _____                                                   | _____                                 |

| Welk probleem ondervond u?                                                                                              | Bij welk geneesmiddel?                                                                                                                                       | Heeft u actie ondernomen?                                                              |
|-------------------------------------------------------------------------------------------------------------------------|--------------------------------------------------------------------------------------------------------------------------------------------------------------|----------------------------------------------------------------------------------------|
| <input type="checkbox"/> Vergeten in te nemen                                                                           | <input type="checkbox"/> Bij alle geneesmiddelen<br><input type="checkbox"/> Bij specifieke geneesmiddelen:<br><br><input type="checkbox"/> Ik weet het niet | <input type="checkbox"/> Neen<br><input type="checkbox"/> Ja, namelijk<br><br><br><br> |
| <input type="checkbox"/> Problemen met toedienen van geneesmiddelen (slikproblemen, inhaleren, insmeren, inspuiten,...) | <input type="checkbox"/> Bij alle geneesmiddelen<br><input type="checkbox"/> Bij specifieke geneesmiddelen:<br><br><input type="checkbox"/> Ik weet het niet | <input type="checkbox"/> Neen<br><input type="checkbox"/> Ja, namelijk<br><br><br><br> |
| <b>d. Problemen met verpakkingen</b>                                                                                    |                                                                                                                                                              |                                                                                        |
| <input type="checkbox"/> Moeilijkheden met openen van de verpakking.                                                    | <input type="checkbox"/> Bij alle geneesmiddelen<br><input type="checkbox"/> Bij specifieke geneesmiddelen:<br><br><input type="checkbox"/> Ik weet het niet | <input type="checkbox"/> Neen<br><input type="checkbox"/> Ja, namelijk<br><br><br><br> |

| Welk probleem ondervond u?                                                                       | Bij welk geneesmiddel?                                                                                                                                       | Heeft u actie ondernomen?                                                              |
|--------------------------------------------------------------------------------------------------|--------------------------------------------------------------------------------------------------------------------------------------------------------------|----------------------------------------------------------------------------------------|
| <input type="checkbox"/> Moeilijkheden met bewaren (vb. verpakking weggegooid)                   | <input type="checkbox"/> Bij alle geneesmiddelen<br><input type="checkbox"/> Bij specifieke geneesmiddelen:<br><br><input type="checkbox"/> Ik weet het niet | <input type="checkbox"/> Neen<br><input type="checkbox"/> Ja, namelijk<br><br><br><br> |
| <input type="checkbox"/> Ik kan niet alle informatie over mijn geneesmiddelen lezen of begrijpen | <input type="checkbox"/> Bij alle geneesmiddelen<br><input type="checkbox"/> Bij specifieke geneesmiddelen:<br><br><input type="checkbox"/> Ik weet het niet | <input type="checkbox"/> Neen<br><input type="checkbox"/> Ja, namelijk<br><br><br><br> |
| <b>e. Andere problemen</b>                                                                       |                                                                                                                                                              |                                                                                        |
| <br><br><br><br>                                                                                 | <input type="checkbox"/> Bij alle geneesmiddelen<br><input type="checkbox"/> Bij specifieke geneesmiddelen:<br><br><input type="checkbox"/> Ik weet het niet | <input type="checkbox"/> Neen<br><input type="checkbox"/> Ja, namelijk<br><br><br><br> |

# Probleemfiche

Datum van invullen: \_\_\_\_/\_\_\_\_/\_\_\_\_

| Datum: ____/____/____ of periode vanaf ____/____/____ tot ____/____/____                                                        |                                                         |                                       |
|---------------------------------------------------------------------------------------------------------------------------------|---------------------------------------------------------|---------------------------------------|
| Welk probleem ondervond u?                                                                                                      | Bij welk geneesmiddel?                                  | Heeft u actie ondernomen?             |
| <b>a. Problemen met aankoop</b>                                                                                                 |                                                         |                                       |
| <input type="checkbox"/> Geneesmiddelen niet in voorraad                                                                        | <input type="checkbox"/> Bij alle geneesmiddelen        | <input type="checkbox"/> Neen         |
| <input type="checkbox"/> Vergeten te halen bij de apotheek                                                                      | <input type="checkbox"/> Bij specifieke geneesmiddelen: | <input type="checkbox"/> Ja, namelijk |
| <input type="checkbox"/> Ik kan mijn geneesmiddelen niet verkrijgen (niet mogelijk om zelf te halen, geen hulp van anderen,...) | _____                                                   | _____                                 |
| <input type="checkbox"/> Ik kan de geneesmiddelen niet betalen                                                                  | <input type="checkbox"/> Ik weet het niet               | _____                                 |
| <input type="checkbox"/> Ik had geen (vervolg)voorschrift                                                                       | _____                                                   | _____                                 |
| <b>b. Nevenwerkingen</b>                                                                                                        |                                                         |                                       |
| <input type="checkbox"/> Bij alle geneesmiddelen                                                                                | <input type="checkbox"/> Neen                           |                                       |
| <input type="checkbox"/> Bij specifieke geneesmiddelen:                                                                         | <input type="checkbox"/> Ja, namelijk                   |                                       |
| _____                                                                                                                           | _____                                                   | _____                                 |
| <input type="checkbox"/> Ik weet het niet                                                                                       | _____                                                   | _____                                 |

| Welk probleem ondervond u?                              | Bij welk geneesmiddel?                                  | Heeft u actie ondernomen?             |
|---------------------------------------------------------|---------------------------------------------------------|---------------------------------------|
| <b>c. Problemen met geneesmiddelengebruik</b>           |                                                         |                                       |
| <input type="checkbox"/> Ik nam een verkeerde dosis     | <input type="checkbox"/> Bij alle geneesmiddelen        | <input type="checkbox"/> Neen         |
| <input type="checkbox"/> Meer dan voorgeschreven        | <input type="checkbox"/> Bij specifieke geneesmiddelen: | <input type="checkbox"/> Ja, namelijk |
| <input type="checkbox"/> Minder dan voorgeschreven      | _____                                                   | _____                                 |
| <input type="checkbox"/> Andere: _____                  | _____                                                   | _____                                 |
| _____                                                   | <input type="checkbox"/> Ik weet het niet               | _____                                 |
| <input type="checkbox"/> Op verkeerd tijdstip ingenomen | <input type="checkbox"/> Bij alle geneesmiddelen        | <input type="checkbox"/> Neen         |
| <input type="checkbox"/> Te vroeg/te snel               | <input type="checkbox"/> Bij specifieke geneesmiddelen: | <input type="checkbox"/> Ja, namelijk |
| <input type="checkbox"/> Te laat                        | _____                                                   | _____                                 |
| <input type="checkbox"/> Andere: _____                  | _____                                                   | _____                                 |
| _____                                                   | <input type="checkbox"/> Ik weet het niet               | _____                                 |
| <input type="checkbox"/> Op de foute manier ingenomen   | <input type="checkbox"/> Bij alle geneesmiddelen        | <input type="checkbox"/> Neen         |
| _____                                                   | <input type="checkbox"/> Bij specifieke geneesmiddelen: | <input type="checkbox"/> Ja, namelijk |
| _____                                                   | _____                                                   | _____                                 |
| <input type="checkbox"/> Ik weet het niet               | _____                                                   | _____                                 |



| Welk probleem ondervond u?                                                                                              | Bij welk geneesmiddel?                                                                                                                                       | Heeft u actie ondernomen?                                                              |
|-------------------------------------------------------------------------------------------------------------------------|--------------------------------------------------------------------------------------------------------------------------------------------------------------|----------------------------------------------------------------------------------------|
| <input type="checkbox"/> Vergeten in te nemen                                                                           | <input type="checkbox"/> Bij alle geneesmiddelen<br><input type="checkbox"/> Bij specifieke geneesmiddelen:<br><br><input type="checkbox"/> Ik weet het niet | <input type="checkbox"/> Neen<br><input type="checkbox"/> Ja, namelijk<br><br><br><br> |
| <input type="checkbox"/> Problemen met toedienen van geneesmiddelen (slikproblemen, inhaleren, insmeren, inspuiten,...) | <input type="checkbox"/> Bij alle geneesmiddelen<br><input type="checkbox"/> Bij specifieke geneesmiddelen:<br><br><input type="checkbox"/> Ik weet het niet | <input type="checkbox"/> Neen<br><input type="checkbox"/> Ja, namelijk<br><br><br><br> |
| <b>d. Problemen met verpakkingen</b>                                                                                    |                                                                                                                                                              |                                                                                        |
| <input type="checkbox"/> Moeilijkheden met openen van de verpakking.                                                    | <input type="checkbox"/> Bij alle geneesmiddelen<br><input type="checkbox"/> Bij specifieke geneesmiddelen:<br><br><input type="checkbox"/> Ik weet het niet | <input type="checkbox"/> Neen<br><input type="checkbox"/> Ja, namelijk<br><br><br><br> |

| Welk probleem ondervond u?                                                                       | Bij welk geneesmiddel?                                                                                                                                       | Heeft u actie ondernomen?                                                              |
|--------------------------------------------------------------------------------------------------|--------------------------------------------------------------------------------------------------------------------------------------------------------------|----------------------------------------------------------------------------------------|
| <input type="checkbox"/> Moeilijkheden met bewaren (vb. verpakking weggegooid)                   | <input type="checkbox"/> Bij alle geneesmiddelen<br><input type="checkbox"/> Bij specifieke geneesmiddelen:<br><br><input type="checkbox"/> Ik weet het niet | <input type="checkbox"/> Neen<br><input type="checkbox"/> Ja, namelijk<br><br><br><br> |
| <input type="checkbox"/> Ik kan niet alle informatie over mijn geneesmiddelen lezen of begrijpen | <input type="checkbox"/> Bij alle geneesmiddelen<br><input type="checkbox"/> Bij specifieke geneesmiddelen:<br><br><input type="checkbox"/> Ik weet het niet | <input type="checkbox"/> Neen<br><input type="checkbox"/> Ja, namelijk<br><br><br><br> |
| <b>e. Andere problemen</b>                                                                       |                                                                                                                                                              |                                                                                        |
| <br><br><br><br>                                                                                 | <input type="checkbox"/> Bij alle geneesmiddelen<br><input type="checkbox"/> Bij specifieke geneesmiddelen:<br><br><input type="checkbox"/> Ik weet het niet | <input type="checkbox"/> Neen<br><input type="checkbox"/> Ja, namelijk<br><br><br><br> |

# Probleemfiche

Datum van invullen: \_\_\_\_/\_\_\_\_/\_\_\_\_

| Datum: ____/____/____ of periode vanaf ____/____/____ tot ____/____/____                                                        |                                                         |                                       |
|---------------------------------------------------------------------------------------------------------------------------------|---------------------------------------------------------|---------------------------------------|
| Welk probleem ondervond u?                                                                                                      | Bij welk geneesmiddel?                                  | Heeft u actie ondernomen?             |
| <b>a. Problemen met aankoop</b>                                                                                                 |                                                         |                                       |
| <input type="checkbox"/> Geneesmiddelen niet in voorraad                                                                        | <input type="checkbox"/> Bij alle geneesmiddelen        | <input type="checkbox"/> Neen         |
| <input type="checkbox"/> Vergeten te halen bij de apotheek                                                                      | <input type="checkbox"/> Bij specifieke geneesmiddelen: | <input type="checkbox"/> Ja, namelijk |
| <input type="checkbox"/> Ik kan mijn geneesmiddelen niet verkrijgen (niet mogelijk om zelf te halen, geen hulp van anderen,...) | _____                                                   | _____                                 |
| <input type="checkbox"/> Ik kan de geneesmiddelen niet betalen                                                                  | <input type="checkbox"/> Ik weet het niet               | _____                                 |
| <input type="checkbox"/> Ik had geen (vervolg)voorschrift                                                                       | _____                                                   | _____                                 |
| <b>b. Nevenwerkingen</b>                                                                                                        |                                                         |                                       |
| <input type="checkbox"/> Bij alle geneesmiddelen                                                                                | <input type="checkbox"/> Neen                           |                                       |
| <input type="checkbox"/> Bij specifieke geneesmiddelen:                                                                         | <input type="checkbox"/> Ja, namelijk                   |                                       |
| _____                                                                                                                           | _____                                                   | _____                                 |
| <input type="checkbox"/> Ik weet het niet                                                                                       | _____                                                   | _____                                 |

| Welk probleem ondervond u?                              | Bij welk geneesmiddel?                                  | Heeft u actie ondernomen?             |
|---------------------------------------------------------|---------------------------------------------------------|---------------------------------------|
| <b>c. Problemen met geneesmiddelengebruik</b>           |                                                         |                                       |
| <input type="checkbox"/> Ik nam een verkeerde dosis     | <input type="checkbox"/> Bij alle geneesmiddelen        | <input type="checkbox"/> Neen         |
| <input type="checkbox"/> Meer dan voorgeschreven        | <input type="checkbox"/> Bij specifieke geneesmiddelen: | <input type="checkbox"/> Ja, namelijk |
| <input type="checkbox"/> Minder dan voorgeschreven      | _____                                                   | _____                                 |
| <input type="checkbox"/> Andere: _____                  | _____                                                   | _____                                 |
| _____                                                   | <input type="checkbox"/> Ik weet het niet               | _____                                 |
| <input type="checkbox"/> Op verkeerd tijdstip ingenomen | <input type="checkbox"/> Bij alle geneesmiddelen        | <input type="checkbox"/> Neen         |
| <input type="checkbox"/> Te vroeg/te snel               | <input type="checkbox"/> Bij specifieke geneesmiddelen: | <input type="checkbox"/> Ja, namelijk |
| <input type="checkbox"/> Te laat                        | _____                                                   | _____                                 |
| <input type="checkbox"/> Andere: _____                  | _____                                                   | _____                                 |
| _____                                                   | <input type="checkbox"/> Ik weet het niet               | _____                                 |
| <input type="checkbox"/> Op de foute manier ingenomen   | <input type="checkbox"/> Bij alle geneesmiddelen        | <input type="checkbox"/> Neen         |
| _____                                                   | <input type="checkbox"/> Bij specifieke geneesmiddelen: | <input type="checkbox"/> Ja, namelijk |
| _____                                                   | _____                                                   | _____                                 |
| <input type="checkbox"/> Ik weet het niet               | _____                                                   | _____                                 |

| Welk probleem ondervond u?                                                                                              | Bij welk geneesmiddel?                                                                                                                                                     | Heeft u actie ondernomen?                                                                         |
|-------------------------------------------------------------------------------------------------------------------------|----------------------------------------------------------------------------------------------------------------------------------------------------------------------------|---------------------------------------------------------------------------------------------------|
| <input type="checkbox"/> Vergeten in te nemen                                                                           | <input type="checkbox"/> Bij alle geneesmiddelen<br><input type="checkbox"/> Bij specifieke geneesmiddelen:<br>_____<br>_____<br><input type="checkbox"/> Ik weet het niet | <input type="checkbox"/> Neen<br><input type="checkbox"/> Ja, namelijk<br>_____<br>_____<br>_____ |
| <input type="checkbox"/> Problemen met toedienen van geneesmiddelen (slikproblemen, inhaleren, insmeren, inspuiten,...) | <input type="checkbox"/> Bij alle geneesmiddelen<br><input type="checkbox"/> Bij specifieke geneesmiddelen:<br>_____<br>_____<br><input type="checkbox"/> Ik weet het niet | <input type="checkbox"/> Neen<br><input type="checkbox"/> Ja, namelijk<br>_____<br>_____<br>_____ |
| <b>d. Problemen met verpakkingen</b>                                                                                    |                                                                                                                                                                            |                                                                                                   |
| <input type="checkbox"/> Moeilijkheden met openen van de verpakking.                                                    | <input type="checkbox"/> Bij alle geneesmiddelen<br><input type="checkbox"/> Bij specifieke geneesmiddelen:<br>_____<br>_____<br><input type="checkbox"/> Ik weet het niet | <input type="checkbox"/> Neen<br><input type="checkbox"/> Ja, namelijk<br>_____<br>_____<br>_____ |

| Welk probleem ondervond u?                                                                       | Bij welk geneesmiddel?                                                                                                                                                     | Heeft u actie ondernomen?                                                                         |
|--------------------------------------------------------------------------------------------------|----------------------------------------------------------------------------------------------------------------------------------------------------------------------------|---------------------------------------------------------------------------------------------------|
| <input type="checkbox"/> Moeilijkheden met bewaren (vb. verpakking weggegooid)                   | <input type="checkbox"/> Bij alle geneesmiddelen<br><input type="checkbox"/> Bij specifieke geneesmiddelen:<br>_____<br>_____<br><input type="checkbox"/> Ik weet het niet | <input type="checkbox"/> Neen<br><input type="checkbox"/> Ja, namelijk<br>_____<br>_____<br>_____ |
| <input type="checkbox"/> Ik kan niet alle informatie over mijn geneesmiddelen lezen of begrijpen | <input type="checkbox"/> Bij alle geneesmiddelen<br><input type="checkbox"/> Bij specifieke geneesmiddelen:<br>_____<br>_____<br><input type="checkbox"/> Ik weet het niet | <input type="checkbox"/> Neen<br><input type="checkbox"/> Ja, namelijk<br>_____<br>_____<br>_____ |
| <b>e. Andere problemen</b>                                                                       |                                                                                                                                                                            |                                                                                                   |
| _____<br>_____<br>_____<br>_____<br><input type="checkbox"/> Ik weet het niet                    | <input type="checkbox"/> Bij alle geneesmiddelen<br><input type="checkbox"/> Bij specifieke geneesmiddelen:<br>_____<br>_____<br><input type="checkbox"/> Ik weet het niet | <input type="checkbox"/> Neen<br><input type="checkbox"/> Ja, namelijk<br>_____<br>_____<br>_____ |

# Probleemfiche

Datum van invullen: \_\_\_\_/\_\_\_\_/\_\_\_\_

| Datum: ____/____/____ of periode vanaf ____/____/____ tot ____/____/____                                                        |                                                         |                                       |
|---------------------------------------------------------------------------------------------------------------------------------|---------------------------------------------------------|---------------------------------------|
| Welk probleem ondervond u?                                                                                                      | Bij welk geneesmiddel?                                  | Heeft u actie ondernomen?             |
| <b>a. Problemen met aankoop</b>                                                                                                 |                                                         |                                       |
| <input type="checkbox"/> Geneesmiddelen niet in voorraad                                                                        | <input type="checkbox"/> Bij alle geneesmiddelen        | <input type="checkbox"/> Neen         |
| <input type="checkbox"/> Vergeten te halen bij de apotheek                                                                      | <input type="checkbox"/> Bij specifieke geneesmiddelen: | <input type="checkbox"/> Ja, namelijk |
| <input type="checkbox"/> Ik kan mijn geneesmiddelen niet verkrijgen (niet mogelijk om zelf te halen, geen hulp van anderen,...) | _____                                                   | _____                                 |
| <input type="checkbox"/> Ik kan de geneesmiddelen niet betalen                                                                  | <input type="checkbox"/> Ik weet het niet               | _____                                 |
| <input type="checkbox"/> Ik had geen (vervolg)voorschrift                                                                       | _____                                                   | _____                                 |
| <b>b. Nevenwerkingen</b>                                                                                                        |                                                         |                                       |
|                                                                                                                                 | <input type="checkbox"/> Bij alle geneesmiddelen        | <input type="checkbox"/> Neen         |
|                                                                                                                                 | <input type="checkbox"/> Bij specifieke geneesmiddelen: | <input type="checkbox"/> Ja, namelijk |
|                                                                                                                                 | _____                                                   | _____                                 |
|                                                                                                                                 | <input type="checkbox"/> Ik weet het niet               | _____                                 |
|                                                                                                                                 | _____                                                   | _____                                 |

| Welk probleem ondervond u?                              | Bij welk geneesmiddel?                                  | Heeft u actie ondernomen?             |
|---------------------------------------------------------|---------------------------------------------------------|---------------------------------------|
| <b>c. Problemen met geneesmiddelengebruik</b>           |                                                         |                                       |
| <input type="checkbox"/> Ik nam een verkeerde dosis     | <input type="checkbox"/> Bij alle geneesmiddelen        | <input type="checkbox"/> Neen         |
| <input type="checkbox"/> Meer dan voorgeschreven        | <input type="checkbox"/> Bij specifieke geneesmiddelen: | <input type="checkbox"/> Ja, namelijk |
| <input type="checkbox"/> Minder dan voorgeschreven      | _____                                                   | _____                                 |
| <input type="checkbox"/> Andere: _____                  | _____                                                   | _____                                 |
|                                                         | <input type="checkbox"/> Ik weet het niet               | _____                                 |
| <input type="checkbox"/> Op verkeerd tijdstip ingenomen | <input type="checkbox"/> Bij alle geneesmiddelen        | <input type="checkbox"/> Neen         |
| <input type="checkbox"/> Te vroeg/te snel               | <input type="checkbox"/> Bij specifieke geneesmiddelen: | <input type="checkbox"/> Ja, namelijk |
| <input type="checkbox"/> Te laat                        | _____                                                   | _____                                 |
| <input type="checkbox"/> Andere: _____                  | _____                                                   | _____                                 |
|                                                         | <input type="checkbox"/> Ik weet het niet               | _____                                 |
| <input type="checkbox"/> Op de foute manier ingenomen   | <input type="checkbox"/> Bij alle geneesmiddelen        | <input type="checkbox"/> Neen         |
|                                                         | <input type="checkbox"/> Bij specifieke geneesmiddelen: | <input type="checkbox"/> Ja, namelijk |
|                                                         | _____                                                   | _____                                 |
|                                                         | <input type="checkbox"/> Ik weet het niet               | _____                                 |
|                                                         | _____                                                   | _____                                 |

| Welk probleem ondervond u?                                                                                              | Bij welk geneesmiddel?                                                                                                                                       | Heeft u actie ondernomen?                                                              |
|-------------------------------------------------------------------------------------------------------------------------|--------------------------------------------------------------------------------------------------------------------------------------------------------------|----------------------------------------------------------------------------------------|
| <input type="checkbox"/> Vergeten in te nemen                                                                           | <input type="checkbox"/> Bij alle geneesmiddelen<br><input type="checkbox"/> Bij specifieke geneesmiddelen:<br><br><input type="checkbox"/> Ik weet het niet | <input type="checkbox"/> Neen<br><input type="checkbox"/> Ja, namelijk<br><br><br><br> |
| <input type="checkbox"/> Problemen met toedienen van geneesmiddelen (slikproblemen, inhaleren, insmeren, inspuiten,...) | <input type="checkbox"/> Bij alle geneesmiddelen<br><input type="checkbox"/> Bij specifieke geneesmiddelen:<br><br><input type="checkbox"/> Ik weet het niet | <input type="checkbox"/> Neen<br><input type="checkbox"/> Ja, namelijk<br><br><br><br> |
| <b>d. Problemen met verpakkingen</b>                                                                                    |                                                                                                                                                              |                                                                                        |
| <input type="checkbox"/> Moeilijkheden met openen van de verpakking.                                                    | <input type="checkbox"/> Bij alle geneesmiddelen<br><input type="checkbox"/> Bij specifieke geneesmiddelen:<br><br><input type="checkbox"/> Ik weet het niet | <input type="checkbox"/> Neen<br><input type="checkbox"/> Ja, namelijk<br><br><br><br> |

| Welk probleem ondervond u?                                                                       | Bij welk geneesmiddel?                                                                                                                                       | Heeft u actie ondernomen?                                                              |
|--------------------------------------------------------------------------------------------------|--------------------------------------------------------------------------------------------------------------------------------------------------------------|----------------------------------------------------------------------------------------|
| <input type="checkbox"/> Moeilijkheden met bewaren (vb. verpakking weggegooid)                   | <input type="checkbox"/> Bij alle geneesmiddelen<br><input type="checkbox"/> Bij specifieke geneesmiddelen:<br><br><input type="checkbox"/> Ik weet het niet | <input type="checkbox"/> Neen<br><input type="checkbox"/> Ja, namelijk<br><br><br><br> |
| <input type="checkbox"/> Ik kan niet alle informatie over mijn geneesmiddelen lezen of begrijpen | <input type="checkbox"/> Bij alle geneesmiddelen<br><input type="checkbox"/> Bij specifieke geneesmiddelen:<br><br><input type="checkbox"/> Ik weet het niet | <input type="checkbox"/> Neen<br><input type="checkbox"/> Ja, namelijk<br><br><br><br> |
| <b>e. Andere problemen</b>                                                                       |                                                                                                                                                              |                                                                                        |
| <br><br><br><br>                                                                                 | <input type="checkbox"/> Bij alle geneesmiddelen<br><input type="checkbox"/> Bij specifieke geneesmiddelen:<br><br><input type="checkbox"/> Ik weet het niet | <input type="checkbox"/> Neen<br><input type="checkbox"/> Ja, namelijk<br><br><br><br> |

# Probleemfiche

Datum van invullen: \_\_\_\_/\_\_\_\_/\_\_\_\_

| Datum: ____/____/____ of periode vanaf ____/____/____ tot ____/____/____                                                        |                                                         |                                       |
|---------------------------------------------------------------------------------------------------------------------------------|---------------------------------------------------------|---------------------------------------|
| Welk probleem ondervond u?                                                                                                      | Bij welk geneesmiddel?                                  | Heeft u actie ondernomen?             |
| <b>a. Problemen met aankoop</b>                                                                                                 |                                                         |                                       |
| <input type="checkbox"/> Geneesmiddelen niet in voorraad                                                                        | <input type="checkbox"/> Bij alle geneesmiddelen        | <input type="checkbox"/> Neen         |
| <input type="checkbox"/> Vergeten te halen bij de apotheek                                                                      | <input type="checkbox"/> Bij specifieke geneesmiddelen: | <input type="checkbox"/> Ja, namelijk |
| <input type="checkbox"/> Ik kan mijn geneesmiddelen niet verkrijgen (niet mogelijk om zelf te halen, geen hulp van anderen,...) | _____                                                   | _____                                 |
| <input type="checkbox"/> Ik kan de geneesmiddelen niet betalen                                                                  | <input type="checkbox"/> Ik weet het niet               | _____                                 |
| <input type="checkbox"/> Ik had geen (vervolg)voorschrift                                                                       | _____                                                   | _____                                 |
| <b>b. Nevenwerkingen</b>                                                                                                        |                                                         |                                       |
| <input type="checkbox"/> Bij alle geneesmiddelen                                                                                | <input type="checkbox"/> Neen                           |                                       |
| <input type="checkbox"/> Bij specifieke geneesmiddelen:                                                                         | <input type="checkbox"/> Ja, namelijk                   |                                       |
| _____                                                                                                                           | _____                                                   | _____                                 |
| <input type="checkbox"/> Ik weet het niet                                                                                       | _____                                                   | _____                                 |

| Welk probleem ondervond u?                              | Bij welk geneesmiddel?                                  | Heeft u actie ondernomen?             |
|---------------------------------------------------------|---------------------------------------------------------|---------------------------------------|
| <b>c. Problemen met geneesmiddelengebruik</b>           |                                                         |                                       |
| <input type="checkbox"/> Ik nam een verkeerde dosis     | <input type="checkbox"/> Bij alle geneesmiddelen        | <input type="checkbox"/> Neen         |
| <input type="checkbox"/> Meer dan voorgeschreven        | <input type="checkbox"/> Bij specifieke geneesmiddelen: | <input type="checkbox"/> Ja, namelijk |
| <input type="checkbox"/> Minder dan voorgeschreven      | _____                                                   | _____                                 |
| <input type="checkbox"/> Andere: _____                  | _____                                                   | _____                                 |
| _____                                                   | <input type="checkbox"/> Ik weet het niet               | _____                                 |
| <input type="checkbox"/> Op verkeerd tijdstip ingenomen | <input type="checkbox"/> Bij alle geneesmiddelen        | <input type="checkbox"/> Neen         |
| <input type="checkbox"/> Te vroeg/te snel               | <input type="checkbox"/> Bij specifieke geneesmiddelen: | <input type="checkbox"/> Ja, namelijk |
| <input type="checkbox"/> Te laat                        | _____                                                   | _____                                 |
| <input type="checkbox"/> Andere: _____                  | _____                                                   | _____                                 |
| _____                                                   | <input type="checkbox"/> Ik weet het niet               | _____                                 |
| <input type="checkbox"/> Op de foute manier ingenomen   | <input type="checkbox"/> Bij alle geneesmiddelen        | <input type="checkbox"/> Neen         |
| _____                                                   | <input type="checkbox"/> Bij specifieke geneesmiddelen: | <input type="checkbox"/> Ja, namelijk |
| _____                                                   | _____                                                   | _____                                 |
| <input type="checkbox"/> Ik weet het niet               | _____                                                   | _____                                 |

| Welk probleem ondervond u?                                                                                              | Bij welk geneesmiddel?                                                                                                                                                     | Heeft u actie ondernomen?                                                                         |
|-------------------------------------------------------------------------------------------------------------------------|----------------------------------------------------------------------------------------------------------------------------------------------------------------------------|---------------------------------------------------------------------------------------------------|
| <input type="checkbox"/> Vergeten in te nemen                                                                           | <input type="checkbox"/> Bij alle geneesmiddelen<br><input type="checkbox"/> Bij specifieke geneesmiddelen:<br>_____<br>_____<br><input type="checkbox"/> Ik weet het niet | <input type="checkbox"/> Neen<br><input type="checkbox"/> Ja, namelijk<br>_____<br>_____<br>_____ |
| <input type="checkbox"/> Problemen met toedienen van geneesmiddelen (slikproblemen, inhaleren, insmeren, inspuiten,...) | <input type="checkbox"/> Bij alle geneesmiddelen<br><input type="checkbox"/> Bij specifieke geneesmiddelen:<br>_____<br>_____<br><input type="checkbox"/> Ik weet het niet | <input type="checkbox"/> Neen<br><input type="checkbox"/> Ja, namelijk<br>_____<br>_____<br>_____ |
| <b>d. Problemen met verpakkingen</b>                                                                                    |                                                                                                                                                                            |                                                                                                   |
| <input type="checkbox"/> Moeilijkheden met openen van de verpakking.                                                    | <input type="checkbox"/> Bij alle geneesmiddelen<br><input type="checkbox"/> Bij specifieke geneesmiddelen:<br>_____<br>_____<br><input type="checkbox"/> Ik weet het niet | <input type="checkbox"/> Neen<br><input type="checkbox"/> Ja, namelijk<br>_____<br>_____<br>_____ |

| Welk probleem ondervond u?                                                                       | Bij welk geneesmiddel?                                                                                                                                                     | Heeft u actie ondernomen?                                                                         |
|--------------------------------------------------------------------------------------------------|----------------------------------------------------------------------------------------------------------------------------------------------------------------------------|---------------------------------------------------------------------------------------------------|
| <input type="checkbox"/> Moeilijkheden met bewaren (vb. verpakking weggegooid)                   | <input type="checkbox"/> Bij alle geneesmiddelen<br><input type="checkbox"/> Bij specifieke geneesmiddelen:<br>_____<br>_____<br><input type="checkbox"/> Ik weet het niet | <input type="checkbox"/> Neen<br><input type="checkbox"/> Ja, namelijk<br>_____<br>_____<br>_____ |
| <input type="checkbox"/> Ik kan niet alle informatie over mijn geneesmiddelen lezen of begrijpen | <input type="checkbox"/> Bij alle geneesmiddelen<br><input type="checkbox"/> Bij specifieke geneesmiddelen:<br>_____<br>_____<br><input type="checkbox"/> Ik weet het niet | <input type="checkbox"/> Neen<br><input type="checkbox"/> Ja, namelijk<br>_____<br>_____<br>_____ |
| <b>e. Andere problemen</b>                                                                       |                                                                                                                                                                            |                                                                                                   |
| _____<br>_____<br>_____<br>_____<br><input type="checkbox"/> Ik weet het niet                    | <input type="checkbox"/> Bij alle geneesmiddelen<br><input type="checkbox"/> Bij specifieke geneesmiddelen:<br>_____<br>_____<br><input type="checkbox"/> Ik weet het niet | <input type="checkbox"/> Neen<br><input type="checkbox"/> Ja, namelijk<br>_____<br>_____<br>_____ |

# Probleemfiche

Datum van invullen: \_\_\_\_/\_\_\_\_/\_\_\_\_

| Datum: ____/____/____ of periode vanaf ____/____/____ tot ____/____/____                                                        |                                                         |                                       |
|---------------------------------------------------------------------------------------------------------------------------------|---------------------------------------------------------|---------------------------------------|
| Welk probleem ondervond u?                                                                                                      | Bij welk geneesmiddel?                                  | Heeft u actie ondernomen?             |
| <b>a. Problemen met aankoop</b>                                                                                                 |                                                         |                                       |
| <input type="checkbox"/> Geneesmiddelen niet in voorraad                                                                        | <input type="checkbox"/> Bij alle geneesmiddelen        | <input type="checkbox"/> Neen         |
| <input type="checkbox"/> Vergeten te halen bij de apotheek                                                                      | <input type="checkbox"/> Bij specifieke geneesmiddelen: | <input type="checkbox"/> Ja, namelijk |
| <input type="checkbox"/> Ik kan mijn geneesmiddelen niet verkrijgen (niet mogelijk om zelf te halen, geen hulp van anderen,...) | _____                                                   | _____                                 |
| <input type="checkbox"/> Ik kan de geneesmiddelen niet betalen                                                                  | <input type="checkbox"/> Ik weet het niet               | _____                                 |
| <input type="checkbox"/> Ik had geen (vervolg)voorschrift                                                                       | _____                                                   | _____                                 |
| <b>b. Nevenwerkingen</b>                                                                                                        |                                                         |                                       |
|                                                                                                                                 | <input type="checkbox"/> Bij alle geneesmiddelen        | <input type="checkbox"/> Neen         |
|                                                                                                                                 | <input type="checkbox"/> Bij specifieke geneesmiddelen: | <input type="checkbox"/> Ja, namelijk |
|                                                                                                                                 | _____                                                   | _____                                 |
|                                                                                                                                 | <input type="checkbox"/> Ik weet het niet               | _____                                 |

| Welk probleem ondervond u?                              | Bij welk geneesmiddel?                                  | Heeft u actie ondernomen?             |
|---------------------------------------------------------|---------------------------------------------------------|---------------------------------------|
| <b>c. Problemen met geneesmiddelengebruik</b>           |                                                         |                                       |
| <input type="checkbox"/> Ik nam een verkeerde dosis     | <input type="checkbox"/> Bij alle geneesmiddelen        | <input type="checkbox"/> Neen         |
| <input type="checkbox"/> Meer dan voorgeschreven        | <input type="checkbox"/> Bij specifieke geneesmiddelen: | <input type="checkbox"/> Ja, namelijk |
| <input type="checkbox"/> Minder dan voorgeschreven      | _____                                                   | _____                                 |
| <input type="checkbox"/> Andere: _____                  | _____                                                   | _____                                 |
|                                                         | <input type="checkbox"/> Ik weet het niet               | _____                                 |
| <input type="checkbox"/> Op verkeerd tijdstip ingenomen | <input type="checkbox"/> Bij alle geneesmiddelen        | <input type="checkbox"/> Neen         |
| <input type="checkbox"/> Te vroeg/te snel               | <input type="checkbox"/> Bij specifieke geneesmiddelen: | <input type="checkbox"/> Ja, namelijk |
| <input type="checkbox"/> Te laat                        | _____                                                   | _____                                 |
| <input type="checkbox"/> Andere: _____                  | _____                                                   | _____                                 |
|                                                         | <input type="checkbox"/> Ik weet het niet               | _____                                 |
| <input type="checkbox"/> Op de foute manier ingenomen   | <input type="checkbox"/> Bij alle geneesmiddelen        | <input type="checkbox"/> Neen         |
|                                                         | <input type="checkbox"/> Bij specifieke geneesmiddelen: | <input type="checkbox"/> Ja, namelijk |
|                                                         | _____                                                   | _____                                 |
|                                                         | <input type="checkbox"/> Ik weet het niet               | _____                                 |



| Welk probleem ondervond u?                                                                                              | Bij welk geneesmiddel?                                                                                                                                       | Heeft u actie ondernomen?                                                              |
|-------------------------------------------------------------------------------------------------------------------------|--------------------------------------------------------------------------------------------------------------------------------------------------------------|----------------------------------------------------------------------------------------|
| <input type="checkbox"/> Vergeten in te nemen                                                                           | <input type="checkbox"/> Bij alle geneesmiddelen<br><input type="checkbox"/> Bij specifieke geneesmiddelen:<br><br><input type="checkbox"/> Ik weet het niet | <input type="checkbox"/> Neen<br><input type="checkbox"/> Ja, namelijk<br><br><br><br> |
| <input type="checkbox"/> Problemen met toedienen van geneesmiddelen (slikproblemen, inhaleren, insmeren, inspuiten,...) | <input type="checkbox"/> Bij alle geneesmiddelen<br><input type="checkbox"/> Bij specifieke geneesmiddelen:<br><br><input type="checkbox"/> Ik weet het niet | <input type="checkbox"/> Neen<br><input type="checkbox"/> Ja, namelijk<br><br><br><br> |
| <b>d. Problemen met verpakkingen</b>                                                                                    |                                                                                                                                                              |                                                                                        |
| <input type="checkbox"/> Moeilijkheden met openen van de verpakking.                                                    | <input type="checkbox"/> Bij alle geneesmiddelen<br><input type="checkbox"/> Bij specifieke geneesmiddelen:<br><br><input type="checkbox"/> Ik weet het niet | <input type="checkbox"/> Neen<br><input type="checkbox"/> Ja, namelijk<br><br><br><br> |

| Welk probleem ondervond u?                                                                       | Bij welk geneesmiddel?                                                                                                                                       | Heeft u actie ondernomen?                                                              |
|--------------------------------------------------------------------------------------------------|--------------------------------------------------------------------------------------------------------------------------------------------------------------|----------------------------------------------------------------------------------------|
| <input type="checkbox"/> Moeilijkheden met bewaren (vb. verpakking weggegooid)                   | <input type="checkbox"/> Bij alle geneesmiddelen<br><input type="checkbox"/> Bij specifieke geneesmiddelen:<br><br><input type="checkbox"/> Ik weet het niet | <input type="checkbox"/> Neen<br><input type="checkbox"/> Ja, namelijk<br><br><br><br> |
| <input type="checkbox"/> Ik kan niet alle informatie over mijn geneesmiddelen lezen of begrijpen | <input type="checkbox"/> Bij alle geneesmiddelen<br><input type="checkbox"/> Bij specifieke geneesmiddelen:<br><br><input type="checkbox"/> Ik weet het niet | <input type="checkbox"/> Neen<br><input type="checkbox"/> Ja, namelijk<br><br><br><br> |
| <b>e. Andere problemen</b>                                                                       |                                                                                                                                                              |                                                                                        |
| <br><br><br><br>                                                                                 | <input type="checkbox"/> Bij alle geneesmiddelen<br><input type="checkbox"/> Bij specifieke geneesmiddelen:<br><br><input type="checkbox"/> Ik weet het niet | <input type="checkbox"/> Neen<br><input type="checkbox"/> Ja, namelijk<br><br><br><br> |

# Probleemfiche

Datum: \_\_\_ / \_\_\_ / \_\_\_ of periode vanaf \_\_\_ / \_\_\_ / \_\_\_ tot \_\_\_ / \_\_\_ / \_\_\_

| Welk probleem ondervond u?                                                                                                      | Bij welk geneesmiddel?                                  | Heeft u actie ondernomen?             |
|---------------------------------------------------------------------------------------------------------------------------------|---------------------------------------------------------|---------------------------------------|
| <b>a. Problemen met aankoop</b>                                                                                                 |                                                         |                                       |
| <input type="checkbox"/> Geneesmiddelen niet in voorraad                                                                        | <input type="checkbox"/> Bij alle geneesmiddelen        | <input type="checkbox"/> Neen         |
| <input type="checkbox"/> Vergeten te halen bij de apotheek                                                                      | <input type="checkbox"/> Bij specifieke geneesmiddelen: | <input type="checkbox"/> Ja, namelijk |
| <input type="checkbox"/> Ik kan mijn geneesmiddelen niet verkrijgen (niet mogelijk om zelf te halen, geen hulp van anderen,...) | _____                                                   | _____                                 |
| <input type="checkbox"/> Ik kan de geneesmiddelen niet betalen                                                                  | <input type="checkbox"/> Ik weet het niet               | _____                                 |
| <input type="checkbox"/> Ik had geen (vervolg)voorschrift                                                                       | _____                                                   | _____                                 |
| <b>b. Nevenwerkingen</b>                                                                                                        |                                                         |                                       |
|                                                                                                                                 | <input type="checkbox"/> Bij alle geneesmiddelen        | <input type="checkbox"/> Neen         |
|                                                                                                                                 | <input type="checkbox"/> Bij specifieke geneesmiddelen: | <input type="checkbox"/> Ja, namelijk |
|                                                                                                                                 | _____                                                   | _____                                 |
|                                                                                                                                 | <input type="checkbox"/> Ik weet het niet               | _____                                 |

| Welk probleem ondervond u?                              | Bij welk geneesmiddel?                                  | Heeft u actie ondernomen?             |
|---------------------------------------------------------|---------------------------------------------------------|---------------------------------------|
| <b>c. Problemen met geneesmiddelengebruik</b>           |                                                         |                                       |
| <input type="checkbox"/> Ik nam een verkeerde dosis     | <input type="checkbox"/> Bij alle geneesmiddelen        | <input type="checkbox"/> Neen         |
| <input type="checkbox"/> Meer dan voorgeschreven        | <input type="checkbox"/> Bij specifieke geneesmiddelen: | <input type="checkbox"/> Ja, namelijk |
| <input type="checkbox"/> Minder dan voorgeschreven      | _____                                                   | _____                                 |
| <input type="checkbox"/> Andere: _____                  | _____                                                   | _____                                 |
|                                                         | <input type="checkbox"/> Ik weet het niet               | _____                                 |
| <input type="checkbox"/> Op verkeerd tijdstip ingenomen | <input type="checkbox"/> Bij alle geneesmiddelen        | <input type="checkbox"/> Neen         |
| <input type="checkbox"/> Te vroeg/te snel               | <input type="checkbox"/> Bij specifieke geneesmiddelen: | <input type="checkbox"/> Ja, namelijk |
| <input type="checkbox"/> Te laat                        | _____                                                   | _____                                 |
| <input type="checkbox"/> Andere: _____                  | _____                                                   | _____                                 |
|                                                         | <input type="checkbox"/> Ik weet het niet               | _____                                 |
| <input type="checkbox"/> Op de foute manier ingenomen   | <input type="checkbox"/> Bij alle geneesmiddelen        | <input type="checkbox"/> Neen         |
|                                                         | <input type="checkbox"/> Bij specifieke geneesmiddelen: | <input type="checkbox"/> Ja, namelijk |
|                                                         | _____                                                   | _____                                 |
|                                                         | <input type="checkbox"/> Ik weet het niet               | _____                                 |

| Welk probleem ondervond u?                                                                                              | Bij welk geneesmiddel?                                                                                                                                       | Heeft u actie ondernomen?                                                              |
|-------------------------------------------------------------------------------------------------------------------------|--------------------------------------------------------------------------------------------------------------------------------------------------------------|----------------------------------------------------------------------------------------|
| <input type="checkbox"/> Vergeten in te nemen                                                                           | <input type="checkbox"/> Bij alle geneesmiddelen<br><input type="checkbox"/> Bij specifieke geneesmiddelen:<br><br><input type="checkbox"/> Ik weet het niet | <input type="checkbox"/> Neen<br><input type="checkbox"/> Ja, namelijk<br><br><br><br> |
| <input type="checkbox"/> Problemen met toedienen van geneesmiddelen (slikproblemen, inhaleren, insmeren, inspuiten,...) | <input type="checkbox"/> Bij alle geneesmiddelen<br><input type="checkbox"/> Bij specifieke geneesmiddelen:<br><br><input type="checkbox"/> Ik weet het niet | <input type="checkbox"/> Neen<br><input type="checkbox"/> Ja, namelijk<br><br><br><br> |
| <b>d. Problemen met verpakkingen</b>                                                                                    |                                                                                                                                                              |                                                                                        |
| <input type="checkbox"/> Moeilijkheden met openen van de verpakking.                                                    | <input type="checkbox"/> Bij alle geneesmiddelen<br><input type="checkbox"/> Bij specifieke geneesmiddelen:<br><br><input type="checkbox"/> Ik weet het niet | <input type="checkbox"/> Neen<br><input type="checkbox"/> Ja, namelijk<br><br><br><br> |

| Welk probleem ondervond u?                                                                       | Bij welk geneesmiddel?                                                                                                                                       | Heeft u actie ondernomen?                                                              |
|--------------------------------------------------------------------------------------------------|--------------------------------------------------------------------------------------------------------------------------------------------------------------|----------------------------------------------------------------------------------------|
| <input type="checkbox"/> Moeilijkheden met bewaren (vb. verpakking weggegooid)                   | <input type="checkbox"/> Bij alle geneesmiddelen<br><input type="checkbox"/> Bij specifieke geneesmiddelen:<br><br><input type="checkbox"/> Ik weet het niet | <input type="checkbox"/> Neen<br><input type="checkbox"/> Ja, namelijk<br><br><br><br> |
| <input type="checkbox"/> Ik kan niet alle informatie over mijn geneesmiddelen lezen of begrijpen | <input type="checkbox"/> Bij alle geneesmiddelen<br><input type="checkbox"/> Bij specifieke geneesmiddelen:<br><br><input type="checkbox"/> Ik weet het niet | <input type="checkbox"/> Neen<br><input type="checkbox"/> Ja, namelijk<br><br><br><br> |
| <b>e. Andere problemen</b>                                                                       |                                                                                                                                                              |                                                                                        |
| <br><br><br><br>                                                                                 | <input type="checkbox"/> Bij alle geneesmiddelen<br><input type="checkbox"/> Bij specifieke geneesmiddelen:<br><br><input type="checkbox"/> Ik weet het niet | <input type="checkbox"/> Neen<br><input type="checkbox"/> Ja, namelijk<br><br><br><br> |

# Probleemfiche

Datum van invullen: \_\_\_\_/\_\_\_\_/\_\_\_\_

| Datum: ____/____/____ of periode vanaf ____/____/____ tot ____/____/____                                                        |                                                                                                             |                                                                        |
|---------------------------------------------------------------------------------------------------------------------------------|-------------------------------------------------------------------------------------------------------------|------------------------------------------------------------------------|
| Welk probleem ondervond u?                                                                                                      | Bij welk geneesmiddel?                                                                                      | Heeft u actie ondernomen?                                              |
| <b>a. Problemen met aankoop</b>                                                                                                 |                                                                                                             |                                                                        |
| <input type="checkbox"/> Geneesmiddelen niet in voorraad                                                                        | <input type="checkbox"/> Bij alle geneesmiddelen<br><input type="checkbox"/> Bij specifieke geneesmiddelen: | <input type="checkbox"/> Neen<br><input type="checkbox"/> Ja, namelijk |
| <input type="checkbox"/> Vergeten te halen bij de apotheek                                                                      |                                                                                                             |                                                                        |
| <input type="checkbox"/> Ik kan mijn geneesmiddelen niet verkrijgen (niet mogelijk om zelf te halen, geen hulp van anderen,...) |                                                                                                             |                                                                        |
| <input type="checkbox"/> Ik kan de geneesmiddelen niet betalen                                                                  | <input type="checkbox"/> Ik weet het niet                                                                   |                                                                        |
| <input type="checkbox"/> Ik had geen (vervolg)voorschrift                                                                       |                                                                                                             |                                                                        |
| <b>b. Nevenwerkingen</b>                                                                                                        |                                                                                                             |                                                                        |
|                                                                                                                                 | <input type="checkbox"/> Bij alle geneesmiddelen<br><input type="checkbox"/> Bij specifieke geneesmiddelen: | <input type="checkbox"/> Neen<br><input type="checkbox"/> Ja, namelijk |
|                                                                                                                                 |                                                                                                             |                                                                        |
|                                                                                                                                 | <input type="checkbox"/> Ik weet het niet                                                                   |                                                                        |

| Welk probleem ondervond u?                              | Bij welk geneesmiddel?                                                                                      | Heeft u actie ondernomen?                                              |
|---------------------------------------------------------|-------------------------------------------------------------------------------------------------------------|------------------------------------------------------------------------|
| <b>c. Problemen met geneesmiddelengebruik</b>           |                                                                                                             |                                                                        |
| <input type="checkbox"/> Ik nam een verkeerde dosis     | <input type="checkbox"/> Bij alle geneesmiddelen<br><input type="checkbox"/> Bij specifieke geneesmiddelen: | <input type="checkbox"/> Neen<br><input type="checkbox"/> Ja, namelijk |
| <input type="checkbox"/> Meer dan voorgeschreven        |                                                                                                             |                                                                        |
| <input type="checkbox"/> Minder dan voorgeschreven      |                                                                                                             |                                                                        |
| <input type="checkbox"/> Andere: _____                  |                                                                                                             |                                                                        |
|                                                         | <input type="checkbox"/> Ik weet het niet                                                                   |                                                                        |
| <input type="checkbox"/> Op verkeerd tijdstip ingenomen | <input type="checkbox"/> Bij alle geneesmiddelen<br><input type="checkbox"/> Bij specifieke geneesmiddelen: | <input type="checkbox"/> Neen<br><input type="checkbox"/> Ja, namelijk |
| <input type="checkbox"/> Te vroeg/te snel               |                                                                                                             |                                                                        |
| <input type="checkbox"/> Te laat                        |                                                                                                             |                                                                        |
| <input type="checkbox"/> Andere: _____                  |                                                                                                             |                                                                        |
|                                                         | <input type="checkbox"/> Ik weet het niet                                                                   |                                                                        |
| <input type="checkbox"/> Op de foute manier ingenomen   | <input type="checkbox"/> Bij alle geneesmiddelen<br><input type="checkbox"/> Bij specifieke geneesmiddelen: | <input type="checkbox"/> Neen<br><input type="checkbox"/> Ja, namelijk |
|                                                         |                                                                                                             |                                                                        |
|                                                         | <input type="checkbox"/> Ik weet het niet                                                                   |                                                                        |

| Welk probleem ondervond u?                                                                                              | Bij welk geneesmiddel?                                                                                                                                       | Heeft u actie ondernomen?                                                              |
|-------------------------------------------------------------------------------------------------------------------------|--------------------------------------------------------------------------------------------------------------------------------------------------------------|----------------------------------------------------------------------------------------|
| <input type="checkbox"/> Vergeten in te nemen                                                                           | <input type="checkbox"/> Bij alle geneesmiddelen<br><input type="checkbox"/> Bij specifieke geneesmiddelen:<br><br><input type="checkbox"/> Ik weet het niet | <input type="checkbox"/> Neen<br><input type="checkbox"/> Ja, namelijk<br><br><br><br> |
| <input type="checkbox"/> Problemen met toedienen van geneesmiddelen (slikproblemen, inhaleren, insmeren, inspuiten,...) | <input type="checkbox"/> Bij alle geneesmiddelen<br><input type="checkbox"/> Bij specifieke geneesmiddelen:<br><br><input type="checkbox"/> Ik weet het niet | <input type="checkbox"/> Neen<br><input type="checkbox"/> Ja, namelijk<br><br><br><br> |
| <b>d. Problemen met verpakkingen</b>                                                                                    |                                                                                                                                                              |                                                                                        |
| <input type="checkbox"/> Moeilijkheden met openen van de verpakking.                                                    | <input type="checkbox"/> Bij alle geneesmiddelen<br><input type="checkbox"/> Bij specifieke geneesmiddelen:<br><br><input type="checkbox"/> Ik weet het niet | <input type="checkbox"/> Neen<br><input type="checkbox"/> Ja, namelijk<br><br><br><br> |

| Welk probleem ondervond u?                                                                       | Bij welk geneesmiddel?                                                                                                                                       | Heeft u actie ondernomen?                                                              |
|--------------------------------------------------------------------------------------------------|--------------------------------------------------------------------------------------------------------------------------------------------------------------|----------------------------------------------------------------------------------------|
| <input type="checkbox"/> Moeilijkheden met bewaren (vb. verpakking weggegooid)                   | <input type="checkbox"/> Bij alle geneesmiddelen<br><input type="checkbox"/> Bij specifieke geneesmiddelen:<br><br><input type="checkbox"/> Ik weet het niet | <input type="checkbox"/> Neen<br><input type="checkbox"/> Ja, namelijk<br><br><br><br> |
| <input type="checkbox"/> Ik kan niet alle informatie over mijn geneesmiddelen lezen of begrijpen | <input type="checkbox"/> Bij alle geneesmiddelen<br><input type="checkbox"/> Bij specifieke geneesmiddelen:<br><br><input type="checkbox"/> Ik weet het niet | <input type="checkbox"/> Neen<br><input type="checkbox"/> Ja, namelijk<br><br><br><br> |
| <b>e. Andere problemen</b>                                                                       |                                                                                                                                                              |                                                                                        |
| <br><br><br><br>                                                                                 | <input type="checkbox"/> Bij alle geneesmiddelen<br><input type="checkbox"/> Bij specifieke geneesmiddelen:<br><br><input type="checkbox"/> Ik weet het niet | <input type="checkbox"/> Neen<br><input type="checkbox"/> Ja, namelijk<br><br><br><br> |

# Probleemfiche

Datum van invullen: \_\_\_\_/\_\_\_\_/\_\_\_\_

| Datum: ____/____/____ of periode vanaf ____/____/____ tot ____/____/____                                                        |                                                         |                                       |
|---------------------------------------------------------------------------------------------------------------------------------|---------------------------------------------------------|---------------------------------------|
| Welk probleem ondervond u?                                                                                                      | Bij welk geneesmiddel?                                  | Heeft u actie ondernomen?             |
| <b>a. Problemen met aankoop</b>                                                                                                 |                                                         |                                       |
| <input type="checkbox"/> Geneesmiddelen niet in voorraad                                                                        | <input type="checkbox"/> Bij alle geneesmiddelen        | <input type="checkbox"/> Neen         |
| <input type="checkbox"/> Vergeten te halen bij de apotheek                                                                      | <input type="checkbox"/> Bij specifieke geneesmiddelen: | <input type="checkbox"/> Ja, namelijk |
| <input type="checkbox"/> Ik kan mijn geneesmiddelen niet verkrijgen (niet mogelijk om zelf te halen, geen hulp van anderen,...) | _____                                                   | _____                                 |
| <input type="checkbox"/> Ik kan de geneesmiddelen niet betalen                                                                  | <input type="checkbox"/> Ik weet het niet               | _____                                 |
| <input type="checkbox"/> Ik had geen (vervolg)voorschrift                                                                       | _____                                                   | _____                                 |
| <b>b. Nevenwerkingen</b>                                                                                                        |                                                         |                                       |
|                                                                                                                                 | <input type="checkbox"/> Bij alle geneesmiddelen        | <input type="checkbox"/> Neen         |
|                                                                                                                                 | <input type="checkbox"/> Bij specifieke geneesmiddelen: | <input type="checkbox"/> Ja, namelijk |
|                                                                                                                                 | _____                                                   | _____                                 |
|                                                                                                                                 | <input type="checkbox"/> Ik weet het niet               | _____                                 |
|                                                                                                                                 | _____                                                   | _____                                 |

| Welk probleem ondervond u?                              | Bij welk geneesmiddel?                                  | Heeft u actie ondernomen?             |
|---------------------------------------------------------|---------------------------------------------------------|---------------------------------------|
| <b>c. Problemen met geneesmiddelengebruik</b>           |                                                         |                                       |
| <input type="checkbox"/> Ik nam een verkeerde dosis     | <input type="checkbox"/> Bij alle geneesmiddelen        | <input type="checkbox"/> Neen         |
| <input type="checkbox"/> Meer dan voorgeschreven        | <input type="checkbox"/> Bij specifieke geneesmiddelen: | <input type="checkbox"/> Ja, namelijk |
| <input type="checkbox"/> Minder dan voorgeschreven      | _____                                                   | _____                                 |
| <input type="checkbox"/> Andere: _____                  | _____                                                   | _____                                 |
|                                                         | <input type="checkbox"/> Ik weet het niet               | _____                                 |
| <input type="checkbox"/> Op verkeerd tijdstip ingenomen | <input type="checkbox"/> Bij alle geneesmiddelen        | <input type="checkbox"/> Neen         |
| <input type="checkbox"/> Te vroeg/te snel               | <input type="checkbox"/> Bij specifieke geneesmiddelen: | <input type="checkbox"/> Ja, namelijk |
| <input type="checkbox"/> Te laat                        | _____                                                   | _____                                 |
| <input type="checkbox"/> Andere: _____                  | _____                                                   | _____                                 |
|                                                         | <input type="checkbox"/> Ik weet het niet               | _____                                 |
| <input type="checkbox"/> Op de foute manier ingenomen   | <input type="checkbox"/> Bij alle geneesmiddelen        | <input type="checkbox"/> Neen         |
|                                                         | <input type="checkbox"/> Bij specifieke geneesmiddelen: | <input type="checkbox"/> Ja, namelijk |
|                                                         | _____                                                   | _____                                 |
|                                                         | <input type="checkbox"/> Ik weet het niet               | _____                                 |
|                                                         | _____                                                   | _____                                 |

| Welk probleem ondervond u?                                                                                              | Bij welk geneesmiddel?                                                                                                                                                     | Heeft u actie ondernomen?                                                                         |
|-------------------------------------------------------------------------------------------------------------------------|----------------------------------------------------------------------------------------------------------------------------------------------------------------------------|---------------------------------------------------------------------------------------------------|
| <input type="checkbox"/> Vergeten in te nemen                                                                           | <input type="checkbox"/> Bij alle geneesmiddelen<br><input type="checkbox"/> Bij specifieke geneesmiddelen:<br>_____<br>_____<br><input type="checkbox"/> Ik weet het niet | <input type="checkbox"/> Neen<br><input type="checkbox"/> Ja, namelijk<br>_____<br>_____<br>_____ |
| <input type="checkbox"/> Problemen met toedienen van geneesmiddelen (slikproblemen, inhaleren, insmeren, inspuiten,...) | <input type="checkbox"/> Bij alle geneesmiddelen<br><input type="checkbox"/> Bij specifieke geneesmiddelen:<br>_____<br>_____<br><input type="checkbox"/> Ik weet het niet | <input type="checkbox"/> Neen<br><input type="checkbox"/> Ja, namelijk<br>_____<br>_____<br>_____ |
| <b>d. Problemen met verpakkingen</b>                                                                                    |                                                                                                                                                                            |                                                                                                   |
| <input type="checkbox"/> Moeilijkheden met openen van de verpakking.                                                    | <input type="checkbox"/> Bij alle geneesmiddelen<br><input type="checkbox"/> Bij specifieke geneesmiddelen:<br>_____<br>_____<br><input type="checkbox"/> Ik weet het niet | <input type="checkbox"/> Neen<br><input type="checkbox"/> Ja, namelijk<br>_____<br>_____<br>_____ |

| Welk probleem ondervond u?                                                                       | Bij welk geneesmiddel?                                                                                                                                                     | Heeft u actie ondernomen?                                                                         |
|--------------------------------------------------------------------------------------------------|----------------------------------------------------------------------------------------------------------------------------------------------------------------------------|---------------------------------------------------------------------------------------------------|
| <input type="checkbox"/> Moeilijkheden met bewaren (vb. verpakking weggegooid)                   | <input type="checkbox"/> Bij alle geneesmiddelen<br><input type="checkbox"/> Bij specifieke geneesmiddelen:<br>_____<br>_____<br><input type="checkbox"/> Ik weet het niet | <input type="checkbox"/> Neen<br><input type="checkbox"/> Ja, namelijk<br>_____<br>_____<br>_____ |
| <input type="checkbox"/> Ik kan niet alle informatie over mijn geneesmiddelen lezen of begrijpen | <input type="checkbox"/> Bij alle geneesmiddelen<br><input type="checkbox"/> Bij specifieke geneesmiddelen:<br>_____<br>_____<br><input type="checkbox"/> Ik weet het niet | <input type="checkbox"/> Neen<br><input type="checkbox"/> Ja, namelijk<br>_____<br>_____<br>_____ |
| <b>e. Andere problemen</b>                                                                       |                                                                                                                                                                            |                                                                                                   |
| _____<br>_____<br>_____<br>_____<br><input type="checkbox"/> Ik weet het niet                    | <input type="checkbox"/> Bij alle geneesmiddelen<br><input type="checkbox"/> Bij specifieke geneesmiddelen:<br>_____<br>_____<br><input type="checkbox"/> Ik weet het niet | <input type="checkbox"/> Neen<br><input type="checkbox"/> Ja, namelijk<br>_____<br>_____<br>_____ |





Lined writing area for page 94

Lined writing area for page 95

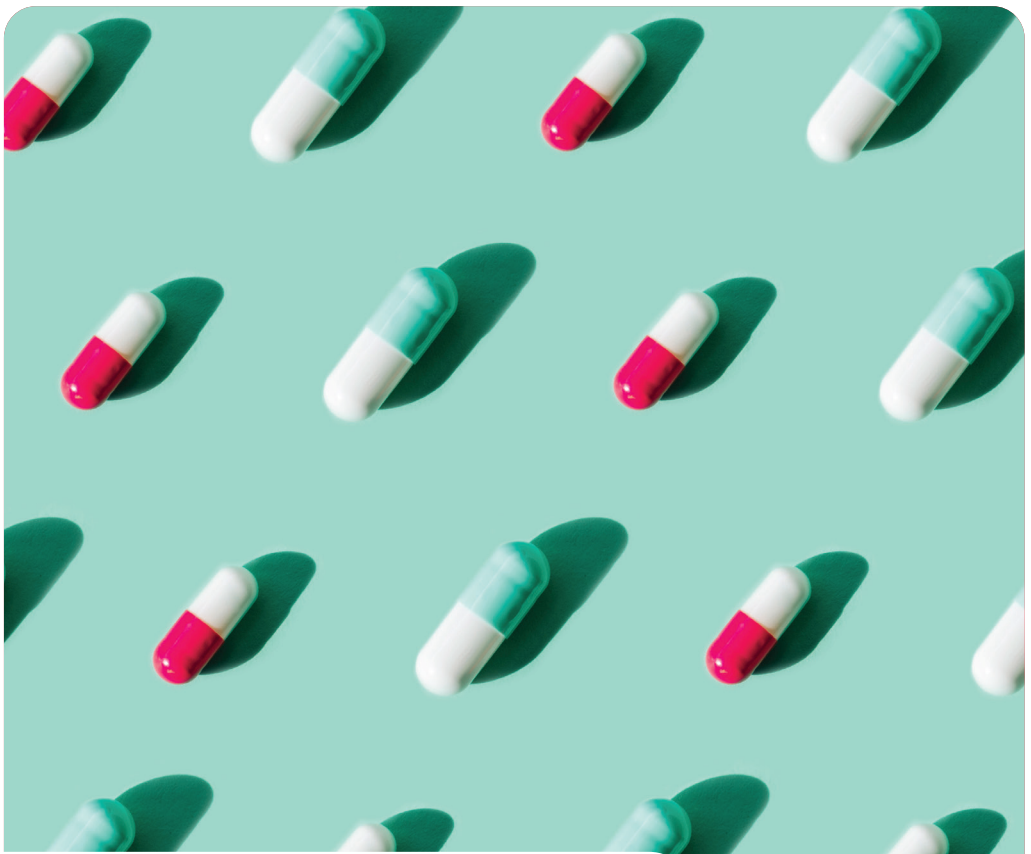

Een goede communicatie tussen patiënten en zorgverleners is erg belangrijk om een behandeling met geneesmiddelen goed te laten werken. Enerzijds is het belangrijk dat de behandeling kan afgestemd worden op de noden, ervaringen en doelstellingen van de patiënt. Anderzijds is het voor zorgverleners belangrijk te weten hoe het geneesmiddelengebruik verloopt bij de patiënt.

Dit dagboek biedt de mogelijkheid om problemen met uw geneesmiddelen te registreren. Dit maakt het op zijn beurt makkelijker om problemen bespreekbaar te maken bij de huisarts, apotheker, verpleegkundige of andere zorgverleners. Op deze manier kunnen zij u helpen bij het afstemmen van de geneesmiddelenzorg op uw noden.

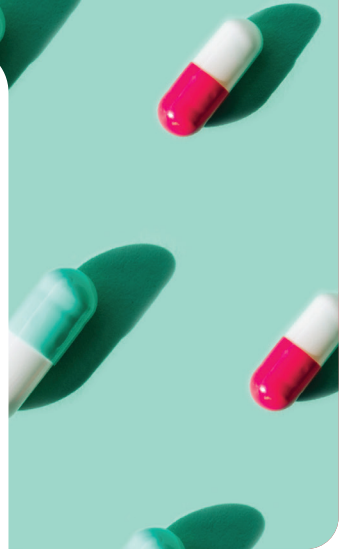

Supplement: mmc3.pdf [file mmc3.pdf]
