# Supplementary material for: The development and evaluation of a medication diary to report problems with medication use
Source: PubMed Central journal article supplement — Heliyon. 2024 Feb 9;10(4):e26127. doi: 10.1016/j.heliyon.2024.e26127 (PMC10875575; doi:10.1016/j.heliyon.2024.e26127), 2024-02-09
Supplement: mmc4.pdf [file mmc4.pdf]

**Questions regarding the medication diary**

*The medication diary was pilot tested by patients as part of a larger prospective descriptive study on the feasibility and validity of different methods measuring medication adherence. In this supplementary file, only questions regarding the evaluation of the format, content and user-friendliness of the medication diary are displayed.*

1. How went the completion of the self-reported medication diary? Please indicate the extent to which you agree with the statements below.

|                                                                                                                      | Strongly disagree | Disagree | Agree | Strongly agree |
|----------------------------------------------------------------------------------------------------------------------|-------------------|----------|-------|----------------|
| I reported every problem I encountered with my medication in the diary.                                              |                   |          |       |                |
| Filling out the diary was easy.                                                                                      |                   |          |       |                |
| Filling out the diary was no effort at all.                                                                          |                   |          |       |                |
| I would prefer to keep a digital diary.                                                                              |                   |          |       |                |
| The diary can help me discuss medication-related problems with the home care nurse, GP or other healthcare provider. |                   |          |       |                |

2. In your opinion, should anything be changed in the diary to make the diary more user-friendly?

No

Yes, namely:

Smaller size

Larger size

Smaller font

Larger font

More structure

Less structure

More space for free text notes

Other: .....

3. In your opinion, should anything be added to the medication diary?

No

Yes, namely: .....

.....

4. In your opinion, should anything be removed from the medication diary?

No

Yes, namely: .....

.....
